# Supplementary material for: Study protocol for a single-centre, prospective, non-blinded, randomised, 12-month, parallel-group superiority study to compare the efficacy of pharmacist intervention versus usual care for elderly patients hospitalised in orthopaedic wards
Source: PubMed Central journal article supplement — BMJ Open. 2018 Jul 30;8(7):e021924. doi: 10.1136/bmjopen-2018-021924 (PMC6067359; doi:10.1136/bmjopen-2018-021924), 2018-07-30
Supplement: bmjopen-2018-021924.draft_revisions.pdf [file bmjopen-2018-021924.draft_revisions.pdf]

# BMJ Open

BMJ Open is committed to open peer review. As part of this commitment we make the peer review history of every article we publish publicly available.

When an article is published we post the peer reviewers' comments and the authors' responses online. We also post the versions of the paper that were used during peer review. These are the versions that the peer review comments apply to.

The versions of the paper that follow are the versions that were submitted during the peer review process. They are not the versions of record or the final published versions. They should not be cited or distributed as the published version of this manuscript.

BMJ Open is an open access journal and the full, final, typeset and author-corrected version of record of the manuscript is available on our site with no access controls, subscription charges or pay-per-view fees (<http://bmjopen.bmj.com>).

If you have any questions on BMJ Open's open peer review process please email [info.bmjopen@bmj.com](mailto:info.bmjopen@bmj.com)

# BMJ Open

**A study protocol for a single-centre, prospective, non-blinded, randomised, 12-month, parallel-group superiority study to compare the efficacy of pharmacist intervention versus usual care for elderly patients hospitalised in orthopaedic wards**

|                               |                                                                                                                                                                                                                                                                                                                                                            |
|-------------------------------|------------------------------------------------------------------------------------------------------------------------------------------------------------------------------------------------------------------------------------------------------------------------------------------------------------------------------------------------------------|
| Journal:                      | <i>BMJ Open</i>                                                                                                                                                                                                                                                                                                                                            |
| Manuscript ID                 | bmjopen-2018-021924                                                                                                                                                                                                                                                                                                                                        |
| Article Type:                 | Protocol                                                                                                                                                                                                                                                                                                                                                   |
| Date Submitted by the Author: | 25-Jan-2018                                                                                                                                                                                                                                                                                                                                                |
| Complete List of Authors:     | Komagamine, Junpei; National Hospital Organization Tochigi Medical Center, Internal Medicine<br>Sugawara, Kenichi; National Hospital Organization Tochigi Medical Center, Pharmacy<br>Kaminaga, Miho; National Hospital Organization Tochigi Medical Center, Pharmacy<br>Tatsumi, Shinpei; National Hospital Organization Tochigi Medical Center, Pharmacy |
| Keywords:                     | CLINICAL PHARMACOLOGY, ORTHOPAEDIC & TRAUMA SURGERY, GERIATRIC MEDICINE                                                                                                                                                                                                                                                                                    |
|                               |                                                                                                                                                                                                                                                                                                                                                            |

SCHOLARONE™  
Manuscripts

1 **A study protocol for a single-centre, prospective, non-blinded, randomised,**  
2 **12-month, parallel-group superiority study to compare the efficacy of pharmacist**  
3 **intervention versus usual care for elderly patients hospitalised in orthopaedic**  
4 **wards**

5  
6 Junpei Komagamine, MD<sup>1</sup>; Kenichi Sugawara<sup>2</sup>; Miho Kaminaga<sup>2</sup>; Shinpei Tatsumi<sup>2</sup>

7  
8 <sup>1</sup>Department of Internal Medicine, National Hospital Organization Tochigi Medical  
9 Center, 1-10-37, Nakatomatsuri, Utsunomiya, Tochigi 3208580, Japan.

10 <sup>2</sup>Department of Pharmacy, National Hospital Organization Tochigi Medical Center,  
11 1-10-37, Nakatomatsuri, Utsunomiya, Tochigi 3208580, Japan.

12  
13 **Running title:** Pharmacist interventions

14 **Word count:** 278 (abstract) and 3391 (main text)

15 **Source of support:** None

16

- 1  
2  
3  
4  
5  
6 17 **Corresponding author:** Junpei Komagamine, MD, Department of Internal Medicine,  
7  
8  
9 18 National Hospital Organization Tochigi Medical Center, 1-10-37, Nakatomatsuri,  
10  
11 19 Utsunomiya, Tochigi 3208580, Japan.  
12  
13  
14 20 **Tel.:** +81-28-622-5241, **E-mail:** junpei0919@yahoo.co.jp  
15  
16  
17  
18  
19  
20  
21  
22  
23  
24  
25  
26  
27  
28  
29  
30  
31  
32  
33  
34  
35  
36  
37  
38  
39  
40  
41  
42  
43  
44  
45  
46  
47  
48  
49  
50  
51  
52  
53  
54  
55  
56  
57  
58  
59  
60

1  
2  
3  
4  
5  
6 21 **ABSTRACT**  
7

8 22 **Introduction:** Given that polypharmacy and potentially inappropriate prescribing are  
9  
10  
11 23 common in elderly orthopaedic patients, pharmacist interventions to improve  
12  
13  
14 24 medication practices among this population are important. However, past studies have  
15  
16  
17 25 reported mixed results regarding the effectiveness of pharmacist-led interventions in  
18  
19  
20 26 inpatient elderly care. Furthermore, few randomised controlled trials have evaluated  
21  
22  
23 27 patient-relevant outcomes as a primary endpoint. Therefore, we will evaluate whether a  
24  
25  
26 28 pharmacist-led intervention could reduce readmission of hospitalised elderly  
27  
28  
29 29 orthopaedic patients with polypharmacy or potentially inappropriate prescribing.  
30

31 30 **Methods and analysis:** This is an ongoing single-centre, prospective, non-blinded,  
32  
33  
34 31 randomised controlled trial designed to evaluate the superiority of a pharmacist-led  
35  
36  
37 32 intervention for hospitalised elderly patients compared with usual care. The trial will  
38  
39  
40 33 include newly admitted orthopaedic patients 70 years of age and older with  
41  
42  
43 34 polypharmacy or at least one potentially inappropriate prescription. Usual care includes  
44  
45  
46 35 medication reconciliation, patient education, and monitoring, as well as providing  
47  
48  
49 36 information about discharge medications. Pharmacist interventions, in addition to usual  
50  
51  
52 37 care, include advising the patient's physician to stop unnecessary or inappropriate  
53  
54  
55 38 medications and start necessary medications. The primary outcome is the one-year  
56  
57  
58  
59  
60

1  
2  
3  
4  
5  
6 39 readmission rate. Secondary outcomes are the proportion of patients who undergo  
7  
8  
9 40 emergency department visits and the occurrences of all-cause death, a new fracture,  
10  
11 41 myocardial infarction, and ischaemic stroke. The study started in November 2017, and  
12  
13  
14 42 up to approximately 220 patients will be enrolled.  
15

16  
17 43 **Ethics and dissemination:** The protocol was approved by the Medical Ethics  
18  
19  
20 44 Committee of the National Hospital Organization Tochigi Medical Center (No. 29-22).  
21  
22  
23 45 The trial was registered at the UMIN clinical registry. The results of the primary trials  
24  
25  
26 46 and each of the secondary outcomes will be submitted for publication in a  
27  
28  
29 47 peer-reviewed journal.

30  
31 48 **Trial registration number:** UMIN000029404 (registered October 3, 2017).  
32  
33

34 49  
35  
36  
37 50 **Key words:** Emergency, Orthopaedic ward, Pharmacist intervention, Polypharmacy,  
38  
39  
40 51 Potentially inappropriate prescribing  
41

#### 42 52 43 44 45 53 **Strengths and limitations of this study**

- 46  
47  
48 54 ● This randomised controlled trial will evaluate the effectiveness of pharmacist  
49  
50  
51 55 interventions for hospitalised orthopaedic elderly patients, using  
52  
53  
54 56 patient-relevant outcomes as the primary outcomes.  
55  
56  
57  
58  
59  
60

- 1  
2  
3  
4  
5  
6 57 ● This is a single-centre study with a small sample size and short-term  
7  
8  
9 58 follow-up.  
10  
11 59 ● Orthopaedic patients who are admitted electively or discharged within less  
12  
13  
14 60 than seven days after admission will be excluded.  
15  
16  
17 61 ● Orthopaedic patients who are prescribed fewer than five medications and are  
18  
19  
20 62 taking no potentially inappropriate medications at admission will be excluded.  
21  
22  
23  
24  
25  
26  
27  
28  
29  
30  
31  
32  
33  
34  
35  
36  
37  
38  
39  
40  
41  
42  
43  
44  
45  
46  
47  
48  
49  
50  
51  
52  
53  
54  
55  
56  
57  
58  
59  
60

## 63 INTRODUCTION

64 In recent decades, as the population has aged, polypharmacy and multi-morbidities have  
65 become more complicated problems among elderly patients.[1-3] Polypharmacy in  
66 elderly patients is associated with inappropriate prescribing[4] and adverse events, such  
67 as adverse drug events and death.[5] Because adverse drug events are a primary cause  
68 of preventable hospital admissions among elderly patients,[6] strategies to prevent  
69 drug-related events has been proposed in recent decades.[7-9] These strategies include  
70 deprescribing for polypharmacy[9] and reducing potentially inappropriate prescribing  
71 and potential prescription omissions.[7,8]

72 Polypharmacy and potentially inappropriate prescribing among elderly patients  
73 are particularly common in acute care settings compared with primary care  
74 settings.[10-12] Therefore, it is important to improve the appropriateness of medications  
75 used during hospitalisation. In fact, the American College of Emergency Physicians  
76 Geriatric Emergency Department Guidelines recommend a multidisciplinary team  
77 intervention for all elderly patients who present to the emergency department and are  
78 prescribed more than five medications or at least one potentially inappropriate  
79 medication, regardless of the presenting complaint.[13] Given that physicians are often  
80 unaware of adverse drug events,[14,15] the role of hospital pharmacists in improving



1  
2  
3  
4  
5  
6 81 polypharmacy and potentially inappropriate prescribing in hospitalised elderly patients  
7  
8  
9 82 is important. Nonetheless, past studies have reported mixed results regarding the  
10  
11 83 effectiveness of a pharmacist-led intervention in improving the appropriateness of  
12  
13  
14 84 medications in inpatient elderly care. Although pharmacist intervention can improve the  
15  
16  
17 85 appropriateness of medications in hospitalised elderly patients,[16] the conclusions of  
18  
19  
20 86 past systematic reviews and meta-analyses have been inconsistent regarding whether  
21  
22  
23 87 patient-relevant outcomes, such as mortality and readmission, were improved by these  
24  
25  
26 88 interventions.[17-20] One recent meta-analysis that included seven randomised  
27  
28  
29 89 controlled trials that evaluated the effectiveness of a pharmacist-led intervention in  
30  
31  
32 90 inpatient elderly care also reported little impact of pharmacist interventions on  
33  
34  
35 91 readmission rates.[21] However, most trials included in this meta-analysis were  
36  
37  
38 92 considered to have a high risk of bias. Furthermore, only two of the seven randomised  
39  
40  
41 93 controlled trials included in the meta-analysis evaluated patient-relevant outcomes as  
42  
43  
44 94 primary endpoints.[22,23] In one of those two trials, a comprehensive pharmacist  
45  
46  
47 95 intervention for hospitalised elderly patients with polypharmacy led to a significant  
48  
49  
50 96 reduction in hospital visits.[23] Therefore, it is still too early to conclude that  
51  
52  
53 97 pharmacist-led interventions for hospitalised elderly patients do not improve  
54  
55  
56 98 patient-relevant outcomes. Furthermore, most studies have targeted internal medicine  
57  
58  
59  
60

1  
2  
3  
4  
5  
6 99 patients, while few studies have ever investigated the effectiveness of pharmacist  
7  
8  
9 100 interventions for elderly patients hospitalised in an orthopaedic ward.[21] The  
10  
11 101 prevalence of polypharmacy and potentially inappropriate prescribing are particularly  
12  
13  
14 102 high in elderly orthopaedic patients, and these practices often continue after recovery  
15  
16  
17 103 from a fracture.[24,25] Furthermore, polypharmacy is associated with an increased risk  
18  
19  
20 104 of fall and fracture.[5,26] Therefore, pharmacist interventions for improving the  
21  
22  
23 105 appropriateness of medications in hospitalised elderly orthopaedic patients may be  
24  
25  
26 106 associated with better patient outcomes compared with other settings. Thus, we will  
27  
28  
29 107 conduct a randomised controlled trial to evaluate whether a pharmacist-led intervention  
30  
31  
32 108 reduces readmission in hospitalised elderly orthopaedic patients with polypharmacy or  
33  
34  
35 109 potentially inappropriate prescribing.  
36  
37  
38 110

## 111 **Objectives**

### 112 *Primary objective*

113 Our primary objective is to determine whether pharmacist intervention for elderly  
114 orthopaedic patients with polypharmacy or potentially inappropriate prescribing at  
115 admission reduces one-year readmission rates compared with usual care.

1  
2  
3  
4  
5  
6 116  
7  
8

9 117 *Secondary objectives*  
10  
11

12  
13 118 The key secondary objectives are to determine whether pharmacist intervention for  
14  
15  
16 119 elderly orthopaedic patients with polypharmacy or potentially inappropriate prescribing  
17  
18  
19 120 at admission reduces patient-relevant outcomes, such as all-cause death, myocardial  
20  
21  
22 121 infarction, ischaemic stroke, and any fractures, compared with usual care. Other  
23  
24  
25 122 secondary objectives are to determine whether pharmacist intervention for elderly  
26  
27  
28 123 orthopaedic patients with polypharmacy or potentially inappropriate prescribing at  
29  
30  
31 124 admission reduces the total number of medications, potentially inappropriate  
32  
33 125 prescribing, and potential prescription omissions.  
34  
35

36 126  
37  
38  
39

40 127 **Literature search and review**  
41  
42

43 128 We performed a literature search and review of pharmacist interventions in elderly  
44  
45  
46 129 hospitalised orthopaedic patients. We used the terms “pharmacist”, “polypharmacy”,  
47  
48  
49 130 “medication review”, and “inappropriate prescribing” alone and in combination to  
50  
51  
52 131 search the PubMed and Google Scholar databases through 5 August 2017. We restricted  
53  
54  
55 132 our review to full-text articles published in English or Japanese. We also identified  
56  
57  
58  
59  
60

1  
2  
3  
4  
5  
6 133 references from the relevant articles. We primarily selected randomised controlled trials,  
7  
8  
9 134 systematic reviews, and meta-analyses. We found a recent systematic review regarding  
10  
11 135 the effectiveness of pharmacist-led intervention on patient outcomes in elderly  
12  
13  
14 136 hospitalised patients.[21] Based on this systematic review, we designed this trial.  
15  
16  
17  
18 137

## 19 20 138 **METHODS AND ANALYSIS**

### 21 22 139 **Trial design**

23  
24  
25  
26 140 This study is a single-centre, prospective, non-blinded, randomised, controlled,  
27  
28  
29 141 superiority trial with two parallel groups. All participants who provide consent for  
30  
31  
32 142 participation and fulfil the inclusion criteria will be randomly assigned to the pharmacist  
33  
34  
35 143 intervention group or the usual care group with a 1:1 allocation. The study was  
36  
37  
38 144 approved by the Medical Ethics Committee of the National Hospital Organization  
39  
40  
41 145 Tochigi Medical Center (No. 29-22) and will be conducted in accordance with the  
42  
43  
44 146 Declaration of Helsinki. Standard Protocol Items: The Recommendations for  
45  
46  
47 147 Interventional Trials (SPIRIT checklist)[27] was followed in designing the study  
48  
49 148 protocol (supplementary appendix). Figure 1 summarises the design of the trial, and  
50  
51  
52 149 each of the trial aspects is described in detail below.  
53  
54  
55 150

1  
2  
3  
4  
5  
6 151 **Study setting**  
7

8  
9 152 This study will be conducted in the orthopaedic ward at the National Hospital  
10  
11  
12 153 Organization Tochigi Medical Center. Our hospital is a 350-bed acute care community  
13  
14  
15 154 hospital and is one of five main hospitals that serve approximately 0.5 million  
16  
17  
18 155 individuals in Utsunomiya in the Tochigi prefecture in Japan.  
19  
20

21  
22 156

23  
24 157 **Eligibility criteria**  
25

26  
27 158 Eligible patients are those who meet all of the following inclusion criteria and who do  
28  
29  
30 159 not have any listed exclusion criteria. Based on the American College of Emergency  
31  
32  
33 160 Physicians Geriatric Emergency Department Guidelines[11], the number of medications  
34  
35  
36 161 taken or the presence of potentially inappropriate prescribing at admission will be used  
37  
38  
39 162 as the inclusion criteria. However, the minimum number of medications for inclusion  
40  
41  
42 163 will be five, based on a past study showing that taking five or more medications was a  
43  
44  
45 164 useful parameter for estimating medication-related adverse effects related to frailty,  
46  
47  
48 165 disability, and mortality among men aged 70 years and older.[28]  
49

50 166

51  
52 167 *Inclusion criteria*  
53

54  
55 168 1. Age 70 years and older  
56  
57  
58  
59  
60

1  
2  
3  
4  
5  
6 169 2. Polypharmacy (defined as 5 or more medications) or at least one potentially  
7  
8  
9 170 inappropriate prescription (as defined by the 2015 STOPP criteria[8]) upon  
10  
11 171 admission  
12  
13  
14  
15  
16

172

173 *Exclusion criteria*

174 1. Elective admission

175 2. Inability to contact patient within 72 hours after their admission

176 3. Expected hospital stay duration of < one week

177

178 **Study duration, enrolment and number of sites**

179 The study will be conducted at a single hospital in Japan. The planned sample size is  
180 approximately 220 patients. This study began after November 2017. The planned  
181 follow-up duration for each patient will be two years after the randomisation. Our  
182 investigation period is projected to be three years. However, unless we can recruit the  
183 planned number of patients within three years after beginning this study, we will extend  
184 the investigation duration to achieve the planned number of patients.

185

186 **Screening and registration**

1  
2  
3  
4  
5  
6 187 All elderly patients who are hospitalised in an orthopaedic ward in our hospital will be  
7  
8  
9 188 screened for eligibility for the trial by one of three pharmacists (KS, ST, MK) every  
10  
11 189 weekday morning. Patients who are hospitalised on weekends will be screened on the  
12  
13  
14 190 following Monday morning. If the screened patients are not eligible, we will document  
15  
16  
17 191 the reason for ineligibility for the trial and the number of ineligible patients. All patients  
18  
19  
20 192 who fulfil the inclusion criteria and have no exclusion criteria will be registered by one  
21  
22  
23 193 of three pharmacists (KS, ST, MK) in the central data centre at the National Hospital  
24  
25  
26 194 Organization Tochigi Medical Center. Unless written informed consent is provided by  
27  
28  
29 195 the patients, we will document the reasons why the patients did not provide consent to  
30  
31 196 participate in the trial and document the number of patients who declined to participate  
32  
33  
34 197 in the trial.  
35  
36  
37  
38  
39  
40

#### 41 **Randomisation and allocation concealment**

42  
43  
44  
45 200 All patients who provide consent for participation and who fulfil the inclusion criteria  
46  
47  
48 201 will be randomised. Randomisation will be requested by one of three pharmacists (KS,  
49  
50  
51 202 ST, MK) to the independent randomisation centre at the National Hospital Organization  
52  
53  
54 203 Tochigi Medical Center via webmail. Participants will be randomly assigned to either  
55  
56  
57  
58  
59  
60

1  
2  
3  
4  
5  
6 204 the pharmacist intervention group or the usual care group. Randomisation will be  
7  
8  
9 205 performed as block randomisation with a 1:1 allocation. The computer-generated  
10  
11 206 random allocation sequence will be provided by an independent staff pharmacist who is  
12  
13  
14 207 not involved in the treatment of patients or with the assessment of patient outcomes.  
15  
16  
17 208 The randomisation will not be stratified. The block sizes will be concealed until the  
18  
19  
20 209 primary outcome is analysed. Throughout the study, the randomisation list will also be  
21  
22  
23 210 concealed until the end of the study.  
24  
25  
26  
27  
28  
29

## 30 212 **Blinding**

31  
32  
33 213 Due to the nature of the intervention, neither the participants nor the clinical  
34  
35  
36 214 pharmacists can be blinded to the allocation. Patients will be informed of the group to  
37  
38  
39 215 which they have been randomly allocated. Assessments regarding the outcomes will be  
40  
41  
42 216 conducted by an assessor who knows the treatment allocation. The analysis regarding  
43  
44  
45 217 the primary outcome will be conducted by independent investigators who are blinded to  
46  
47  
48 218 the treatment allocation and are not involved in the assessment of patient outcomes.  
49  
50

51 219

## 52 53 54 55 220 **Pharmacist intervention group**



1  
2  
3  
4  
5  
6 221 Before starting the study, three study pharmacists (KS, ST, MK) were trained during a  
7  
8  
9 222 three-month period from May 2017 to July 2017. Approximately 16 sessions (one hour  
10  
11 223 per session) on medication use in elderly patients based on the 2015 STOPP/START  
12  
13  
14 224 criteria[8] were provided by one internal medicine physician (JK). Therefore, these  
15  
16  
17 225 pharmacists are aware of the 2015 STOPP/START criteria, however, the use of these  
18  
19  
20 226 criteria for the pharmacist intervention will not be mandatory. One of these trained  
21  
22  
23 227 pharmacists (KS, ST, MK) will treat the participants from admission to discharge at the  
24  
25  
26 228 following three stages.

27  
28  
29 229  
30  
31

32 230 *Intervention at admission*

33  
34  
35  
36 231 A comprehensive list of current medications will be compiled within 72 hours after  
37  
38  
39 232 admission. A drug review will be performed, and advice about the following factors will  
40  
41  
42 233 be given to the patient's physician: (1) deprescribing inappropriate or unnecessary  
43  
44  
45 234 medications, (2) starting effective or necessary medications, and (3) modifying  
46  
47  
48 235 medication dosages. However, the final decision to adhere to the advice provided by  
49  
50  
51 236 pharmacists will be made by the physician in charge. Pharmacists will document  
52  
53  
54 237 whether the physicians follow their advice.

1  
2  
3  
4  
5  
6 238  
7  
8

9 239 *Intervention during hospitalisation*  
10  
11

12  
13 240 During the hospital stay, patients will be educated about the harms and benefits of their  
14

15  
16 241 medications. Pharmacists will also provide information about the rationale for  
17

18  
19 242 medication use and therapeutic goals. Patients will be monitored after starting or  
20

21  
22 243 stopping medications.  
23  
24

25 244  
26  
27

28  
29 245 *Intervention at discharge*  
30

31  
32 246 Information about discharge medications (e.g., rationale for changes and monitoring  
33

34  
35 247 needs for newly started or stopped medications) will be summarised in a written  
36

37  
38 248 document by the pharmacists. Patients will receive discharge counselling with this  
39

40  
41 249 summary. The summary will also be sent to the primary care physicians and community  
42

43  
44 250 pharmacists.  
45  
46

47 251  
48  
49

50  
51 252 **Usual care group**  
52  
53  
54  
55  
56  
57  
58  
59  
60

1  
2  
3  
4  
5  
6 253 Usual care typically includes the same elements as those received by the intervention  
7  
8  
9 254 group but is less extensive. In the usual care group, a comprehensive list of current  
10  
11 255 medications will be compiled by the pharmacists (KS, ST, MK) within 72 hours after  
12  
13  
14 256 admission. Patients will be monitored and educated about newly started medications by  
15  
16  
17 257 their physician and will receive discharge counselling. However, unlike in the  
18  
19  
20 258 intervention group, advice from pharmacists about deprescribing and starting  
21  
22  
23 259 medications will not be provided to the patient's physician, except for in cases of  
24  
25  
26 260 apparent harmful effects of medications. Furthermore, pharmacists will neither prepare  
27  
28  
29 261 the summary about discharge medications nor send it to the primary care physicians and  
30  
31  
32 262 community pharmacists. However, at the discretion of the pharmacist providing advice  
33  
34  
35 263 about medications for the physicians, the summary about discharge medications will be  
36  
37  
38 264 prepared. These procedures are the standard practice for pharmacists in most Japanese  
39  
40 265 hospitals.[29]

41  
42  
43 266

#### 46 47 267 **Data collection**

48  
49  
50 268 One of the pharmacists (ST, KS, MK) will collect the demographic and baseline  
51  
52  
53 269 medical information from the patients and/or their caregivers at admission and  
54  
55  
56  
57  
58  
59  
60

1  
2  
3  
4  
5  
6 270 summarise this information on a patient registration form. Participants will be followed  
7  
8  
9 271 and assessed for two years after study entry (Table 1). One of the pharmacists (ST, KS,  
10  
11 272 MK) will assess outcomes at discharge. We will survey the participants or their  
12  
13  
14 273 caregivers regarding information about primary and secondary outcomes by sending  
15  
16  
17 274 letters at 6 months, 12 months, and 24 months after randomisation. If the participants do  
18  
19  
20 275 not respond to the survey, we will try to contact them or their caregivers by telephone to  
21  
22  
23 276 minimise the effect of missing data on study outcomes.  
24  
25

26 277

## 278 **Outcomes**

### 279 *Primary outcome*

280 The primary outcome is the readmission rate within one year after randomisation.  
281 Readmission includes both planned and unplanned admissions. We will evaluate the  
282 difference between the two treatment groups in the proportion of participants who are  
283 readmitted within one year after randomisation. We will also evaluate the differences in  
284 readmission rates between the groups at 6 and 24 months.  
285

52 285

1  
2  
3  
4  
5  
6 286 *Secondary outcomes*  
7

8  
9 287 The secondary outcomes are provided below. These outcomes will be evaluated at  
10  
11  
12 288 discharge and at 6 months, 12 months and 24 months after randomisation. We will  
13  
14  
15 289 evaluate the differences between the two treatment groups regarding these outcomes at  
16  
17  
18 290 discharge, 6 months, 12 months and 24 months.

19  
20  
21 291 • Any-cause death  
22

23  
24  
25 292 • Total number of medications  
26

27  
28  
29 293 • Potentially inappropriate prescribing based on the 2015 STOPP criteria[8]  
30

31  
32 294 • Potential prescribing omission based on the 2015 START criteria[8]  
33  
34

35  
36 295 • Any fractures  
37

38  
39 296 • Ischaemic stroke  
40  
41

42  
43 297 • Myocardial infarction  
44  
45

46  
47 298 • Emergency department visits  
48  
49

50  
51 299

52  
53 300 **Statistical analysis**  
54  
55  
56  
57  
58  
59  
60

1  
2  
3  
4  
5  
6 301 *Sample size calculation*

7  
8 302 We estimated that a sample of 200 patients would provide the study with a power of at  
9  
10  
11 303 least 80% to show a relative risk reduction of 33% for the primary outcome in the  
12  
13  
14 304 intervention group compared with the usual care group (at a two-sided alpha level of  
15  
16  
17 305 0.05), assuming that the proportion of patients who are readmitted within one year is  
18  
19  
20 306 60% in the usual care group (based on a previous study[23]). Assuming that the dropout  
21  
22  
23 307 rate is 10%, we would need to enrol approximately 220 patients.  
24

25  
26 308

27  
28 309 *Statistical analysis*

29  
30  
31 310 The baseline characteristics of the study population will be summarised using  
32  
33  
34 311 descriptive statistics. The intervention group will be compared against the usual group  
35  
36  
37 312 for all primary and secondary outcomes (Table 2). We will use a chi-squared test for  
38  
39  
40 313 binary outcomes and Student's t-test for continuous outcomes. We will calculate the  
41  
42  
43 314 relative risk and number needed to treat with corresponding 95% confidence intervals to  
44  
45  
46 315 compare dichotomous variables, and the difference in the means will be used for an  
47  
48  
49 316 additional analysis of continuous variables. For all tests, we will use 2-sided p-values  
50  
51 317 with an alpha < 0.05 for the level of significance.  
52  
53  
54  
55  
56  
57  
58  
59  
60

1  
2  
3  
4  
5  
6 318 Analyses for all outcomes will include all patients who have undergone  
7  
8  
9 319 randomisation and have provided valid informed consent (intention-to-treat population).  
10  
11 320 Regarding the procedure for missing data, we will exclude the data from participants  
12  
13  
14 321 who are lost to follow-up or whose outcomes are missing. These analyses will be  
15  
16  
17 322 performed using IBM SPSS Statistics Base version 21.0 (IBM Corporation, Nihonbashi,  
18  
19  
20 323 Tokyo, Japan) or Excel statistical software package version 2.11 (Bellcurve for Excel;  
21  
22  
23 324 Social Survey Research Information Co., Ltd., Tokyo, Japan). All analyses will be  
24  
25  
26 325 conducted by investigators who are blinded to the study group allocations.  
27

28  
29  
30  
31 326

### 31 327 **Data management**

32  
33  
34 328 The trial data about study participants will be transmitted to and stored in the research  
35  
36  
37 329 database at National Hospital Organization Tochigi Medical Center. This will not  
38  
39  
40 330 include the participants' identifying information. Rather, individual participants and  
41  
42  
43 331 research data will be identified by a unique study identification number. At the end of  
44  
45  
46 332 the study, the data will be locked. Data will be stored for at least five years after study  
47  
48  
49 333 completion. Access to stored data will be limited to investigators. Data will be stored  
50  
51  
52 334 using codes assigned by the investigators. Data will be kept on password-protected  
53  
54  
55 335 computers.  
56  
57  
58  
59  
60

1  
2  
3  
4  
5  
6 336

7  
8  
9 337 **Monitoring**

10  
11 338 *Data monitoring*

12  
13  
14  
15 339 The risk associated with participation in this study is low, because our aim is to improve  
16  
17 340 the quality of medications in patients. According to the Japanese Ethical Guidelines for  
18  
19 341 Medical and Health Research Involving Human Subjects (as of March 2015), our  
20  
21 342 intervention corresponds with a non-invasive procedure. Therefore, we will not need a  
22  
23 343 data monitoring committee. However, an independent staff pharmacist who is not  
24  
25 344 involved with the trial intervention will monitor the data periodically to ensure safety.  
26  
27  
28  
29  
30

31  
32  
33 345

34  
35  
36 346 *Adverse events*

37  
38  
39  
40 347 In our study, an adverse event will be defined as any undesirable medical occurrence in  
41  
42 348 a participant without regard to the possibility of a causal relationship. Data on adverse  
43  
44 349 events will be collected after the participants have provided consent and enrolled in the  
45  
46 350 study. If a participant experiences an adverse event after the informed consent document  
47  
48 351 is signed and the participant has not yet started to receive the study intervention, the  
49  
50 352 event will be reported as not being related to the study intervention. All adverse events  
51  
52  
53  
54  
55  
56  
57  
58  
59  
60



1  
2  
3  
4  
5  
6 353 that occur after entry into the study and for two years after randomisation will be  
7  
8  
9 354 recorded. A serious adverse event for this study is any undesirable medical occurrence  
10  
11 355 that is believed by the investigators to be causally related to the study intervention and  
12  
13  
14 356 results in any of the following: a life-threatening condition (that is, immediate risk of  
15  
16  
17 357 death) or severe or permanent disability.  
18  
19  
20  
21 358

### 22 23 24 359 *Auditing*

25  
26  
27  
28 360 According to the Japanese Ethical Guidelines for Medical and Health Research  
29  
30  
31 361 Involving Human Subjects (as of March 2015), our intervention corresponds with a  
32  
33  
34 362 non-invasive procedure. Furthermore, past studies investigating the effectiveness of a  
35  
36  
37 363 pharmacist intervention have reported few adverse events.[16-23] Therefore, we will  
38  
39  
40 364 not need auditing.  
41  
42  
43 365

### 44 45 366 **Ethics and dissemination**

46  
47  
48 367 This study protocol was approved by the Medical Ethics Committee of the National  
49  
50  
51 368 Hospital Organization Tochigi Medical Center (Tochigi, Japan). They judged the study  
52  
53  
54 369 design, ethics, and safety. Substantial amendments of the study protocol must be  
55  
56  
57  
58  
59  
60

1  
2  
3  
4  
5  
6 370 approved by the Medical Ethics Committee of the National Hospital Organization  
7  
8  
9 371 Tochigi Medical Center. The trial was registered at the UMIN clinical registry on  
10  
11 372 October 3, 2017. We will obtain informed consent from the trial participants or their  
12  
13  
14 373 authorised surrogates according to the Japanese Ethical Guidelines for Medical and  
15  
16  
17 374 Health Research Involving Human Subjects (as of March 2015). One of three  
18  
19  
20 375 pharmacists (ST, KS, MK) will introduce the trial to patients and discuss the trial with  
21  
22  
23 376 all patients using the information sheets about the nature, purpose, and possible risks  
24  
25  
26 377 and benefits of the trial, which was approved by the Medical Ethics Committee of the  
27  
28  
29 378 National Hospital Organization Tochigi Medical Center. Then, the pharmacists will  
30  
31  
32 379 obtain written informed consent from patients willing to participate in the trial. To  
33  
34 380 assure confidentiality, trial participants will be allocated a unique trial identification  
35  
36  
37 381 number throughout the trial.

38  
39  
40 382 A manuscript with the results of the primary study will be published in a  
41  
42  
43 383 peer-reviewed journal. Separate manuscripts will be written on each of the secondary  
44  
45  
46 384 aims, and these manuscripts will also be submitted for publication in peer-reviewed  
47  
48  
49 385 journals.

50  
51 386

52  
53  
54 387 **DISCUSSION**

1  
2  
3  
4  
5  
6 388           Given that polypharmacy and potentially inappropriate prescribing among  
7  
8  
9 389   elderly patients is common in acute care settings,[10] it is important to improve the  
10  
11 390   appropriateness of medications during hospitalisation. Therefore, the role of hospital  
12  
13  
14 391   pharmacists in improving polypharmacy and potentially inappropriate prescribing in  
15  
16  
17 392   hospitalised elderly patients is important. Nonetheless, there are conflicting results  
18  
19  
20 393   regarding the effectiveness with which pharmacist interventions in elderly inpatient care  
21  
22  
23 394   can improve polypharmacy and potentially inappropriate prescribing to affect  
24  
25  
26 395   patient-relevant outcomes.[17-21] Given that few past randomised controlled trials have  
27  
28  
29 396   evaluated a patient-relevant outcome as a primary endpoint,[22,23] it is important to  
30  
31 397   conduct a randomised controlled trial to evaluate whether a pharmacist-led intervention  
32  
33  
34 398   improves patient-relevant outcomes, such as readmission and death, in hospitalised  
35  
36  
37 399   elderly orthopaedic patients with polypharmacy or potentially inappropriate prescribing.

40  
41 400           There are several limitations to this study. First, the non-blinded study design  
42  
43 401   may overestimate the effectiveness of pharmacist intervention.[30] However, due to the  
44  
45  
46 402   nature of the intervention, it is difficult for both participants and clinical pharmacists to  
47  
48  
49 403   be blinded to the allocation. Second, this study is a single-centre trial. Although most  
50  
51  
52 404   past randomised controlled trials were also a single-centre trials,[21,23,31-34] the  
53  
54  
55 405   external validity of this study is limited. Therefore, an additional randomised controlled

1  
2  
3  
4  
5  
6 406 trial may be needed. Third, we will exclude elderly orthopaedic patients who are  
7  
8  
9 407 admitted electively or who are taking less than five prescribed medications or have no  
10  
11 408 potentially inappropriate prescriptions. Furthermore, elderly patients admitted to other  
12  
13  
14 409 specialty wards, such as internal medicine or general surgery, will also be excluded.  
15  
16  
17 410 Therefore, it is unclear whether the findings of this trial will be applicable to elderly  
18  
19  
20 411 patients who are admitted electively or to other wards besides the orthopaedic ward.  
21  
22  
23 412 Finally, we will not assess the cost-effectiveness of the intervention.  
24

25  
26 413 Although these limitations are important, this study is one of a few randomised  
27  
28 414 controlled trials to investigate the effectiveness of a pharmacist-led intervention and use  
29  
30  
31 415 a patient-relevant outcome as the primary outcome for hospitalised elderly patients.  
32  
33  
34 416 Given that the burdens of polypharmacy and multi-morbidities among elderly patients  
35  
36  
37 417 have increased in recent years, this trial will provide important information on  
38  
39  
40 418 improving the acute care of elderly patients with polypharmacy or potentially  
41  
42  
43 419 inappropriate prescribing.  
44

45  
46  
47  
48 420

49  
50  
51 421 **Acknowledgements:** None.  
52

53  
54  
55  
56  
57  
58  
59  
60 422

1  
2  
3  
4  
5  
6 423 **Contributors:** KS and JK conceived the project. JK performed the literature search and  
7  
8  
9 424 review. KS, JK, ST, and MK designed the study. KS and JK wrote the draft of the  
10  
11 425 protocol for the study. All authors contributed equally to writing the original protocol  
12  
13  
14 426 for this study. KS is the chief investigator of this study. JK wrote the draft of this  
15  
16  
17 427 manuscript. All authors provided final approval for submission of this manuscript for  
18  
19  
20 428 publication consideration.  
21  
22

23 429  
24  
25 430 **Competing interests:** All authors have completed the ICMJE unified disclosure from  
26  
27  
28 431 competing interest form at [www.icmje.org/coi\\_disclosure.pdf](http://www.icmje.org/coi_disclosure.pdf) (available upon request  
29  
30  
31 432 from the corresponding author). All authors declare that they have no conflicts of  
32  
33  
34 433 interest.  
35  
36

37 434  
38  
39 435 **Funding:** This study is investigator initiated and self-funded. It is not supported by a  
40  
41  
42 436 specific grant from any funding agency in the public, commercial, or not-for-profit  
43  
44  
45 437 sector.  
46  
47

48 438  
49  
50  
51 439 **Ethical approval:** This study was approved by the Medical Ethics Committee of the  
52  
53  
54 440 National Hospital Organization Tochigi Medical Center (No. 29-22).  
55  
56  
57  
58  
59  
60

441

442 **REFERENCES**

- 443 1 Wolff JL, Starfield B, Anderson G. Prevalence, expenditures, and complications of  
444 multiple chronic conditions in the elderly. *Arch Intern Med* 2002;162:2269-76.  
445 doi:10.1001/archinte.162.20.2269.
- 446 2 Kaufman DW, Kelly JP, Rosenberg L et al. Recent patterns of medication use in the  
447 ambulatory adult population of the United States: The Slone survey. *JAMA*  
448 2002;287:337-44. doi:10.1001/jama.287.3.337.
- 449 3 Boyd CM, Dare J, Boult C, et al. Clinical practice guidelines and quality of care for  
450 older patients with multiple comorbid diseases. *JAMA* 2005;294:716-24.  
451 doi:10.1001/jama.294.6.716.
- 452 4 Steinman MA, Landefeld CS, Rosenthal GE, et al. Polypharmacy and prescribing  
453 quality in older people. *J Am Geriatr Soc* 2006;54:1516-23.  
454 doi:10.1111/j.1532-5415.2006.00889.x.
- 455 5 Fried TR, O'Leary J, Towle V, et al. Health outcomes associated with polypharmacy  
456 in community-dwelling older adults: a systematic review. *J Am Geriatr Soc*  
457 2014;62:2261-72. doi:10.1111/jgs.13153.

- 1  
2  
3  
4  
5  
6 458 6 Beijer HJ, de Blaey CJ. Hospitalisations caused by adverse drug reactions (ADR): a  
7  
8  
9 459 meta-analysis of observational studies. *Pharm World Sci* 2002;24:46-54.  
10  
11 460 doi:10.1023/A:1015570104121.  
12  
13  
14 461 7 The American Geriatrics Society 2015 Beers Criteria Update Expert Panel.  
15  
16  
17 462 American Geriatrics Society 2015 updated Beers Criteria for potentially  
18  
19  
20 463 inappropriate medication use in older adults. *J Am Geriatr Soc* 2015;63:2227-46.  
21  
22  
23 464 doi:10.1111/jgs.13702.  
24  
25  
26 465 8 O'Mahony D, O'Sullivan D, Byrne S, et al. STOPP/START criteria for potentially  
27  
28  
29 466 inappropriate prescribing in older people: version 2. *Age Ageing* 2015;44:213-8.  
30  
31 467 doi:10.1093/ageing/aful145.  
32  
33  
34 468 9 Scott IA, Hilmer SN, Reeve E, et al. Reducing inappropriate polypharmacy: the  
35  
36  
37 469 process of deprescribing. *JAMA Intern Med* 2015;175(5):827-34.  
38  
39  
40 470 doi:10.1001/jamainternmed.2015.0324.  
41  
42  
43 471 10 Gallagher P, Lang PO, Cherubini A, et al. Prevalence of potentially inappropriate  
44  
45  
46 472 prescribing in an acutely ill population of older patients admitted to six European  
47  
48  
49 473 hospitals. *Eur J Clin Pharmacol* 2011;67:1175-88. doi:10.1007/s00228-011-1061-0.  
50  
51  
52  
53  
54  
55  
56  
57  
58  
59  
60

- 1  
2  
3  
4  
5  
6 474 11 Tommelein E, Mehuys E, Petrovic M, et al. Potentially inappropriate prescribing in  
7  
8  
9 475 community-dwelling older people across Europe: a systematic literature review. *Eur*  
10  
11 476 *J Clin Pharmacol* 2015;71(12):1415-27. doi:10.1007/s00228-015-1954-4.  
12  
13  
14  
15 477 12 Opondo D, Eslami S, Visscher S, et al. Inappropriateness of medication prescriptions  
16  
17  
18 478 to elderly patients in the primary care setting: a systematic review. *PLoS ONE*  
19  
20  
21 479 2012;7(8):e43617. doi:10.1371/journal.pone.0043617.  
22  
23  
24 480 13 The American College of Emergency Physicians, the American Geriatrics Society,  
25  
26 481 Emergency Nurses Association and the Society for Academic Emergency Medicine.  
27  
28  
29 482 Geriatric emergency department guidelines. *Ann Emerg Med* 2014;63:e7-e25. doi:  
30  
31  
32 483 10.1016/j.annemergmed.2014.02.008.  
33  
34  
35 484 14 Hohl CM, Zed PJ, Brubacher JR, et al. Do emergency physicians attribute  
36  
37  
38 485 drug-related emergency department visits to medication-related problems? *Ann*  
39  
40  
41 486 *Emerg Med* 2010;55:493-502. doi:10.1016/j.annemergmed.2009.10.008.  
42  
43  
44 487 15 Gandhi TK, Weingart SN, Borus J, et al. Adverse drug events in ambulatory care.  
45  
46  
47 488 *New Engl J Med* 2003;348:1556-64. doi:10.1056/NEJMsa020703  
48  
49 489 16 Walsh KA, O’Riordan D, Kearney PM, et al. Improving the appropriateness of  
50  
51  
52 490 prescribing in older patients: a systematic review and meta-analysis of pharmacists’  
53  
54  
55  
56  
57  
58  
59  
60



- 1  
2  
3  
4  
5  
6 491 interventions in secondary care. *Age Ageing* 2016;45:201-9.  
7  
8  
9 492 doi:10.1093/ageing/afv190.  
10  
11 493 17 Kaboli PJ, Hoth AB, McClimon BJ, et al. Clinical pharmacists and inpatient  
12  
13  
14 494 medical care: a systematic review. *Arch Intern Med* 2006;166:955-64.  
15  
16  
17 495 doi:10.1001/archinte.166.9.955.  
18  
19  
20 496 18 Holland R, Desborough J, Goodyer L, et al. Does pharmacist-led medication review  
21  
22  
23 497 help to reduce hospital admissions and deaths in older people? A systematic review  
24  
25  
26 498 and meta-analysis. *Br J Clin Pharmacol* 2007;65(3):303-16.  
27  
28  
29 499 doi:10.111/j.1365-2125.2007.03071.x.  
30  
31 500 19 Koshman SL, Charrois TL, Simpson SH, et al. Pharmacist care of patients with heart  
32  
33  
34 501 failure: a systematic review of randomized trials. *Arch Intern Med*  
35  
36  
37 502 2008;168(7):687-94. doi:10.1001/archinte.168.7.687.  
38  
39  
40 503 20 Renaudin P, Boyer L, Esteve MA, et al. Do pharmacist-led medication reviews in  
41  
42  
43 504 hospitals help reduce hospital readmissions? A systematic review and meta-analysis.  
44  
45  
46 505 *Br J Clin Pharm* 2016;82:1660-73. doi:10.1111/bcp.13085.  
47  
48  
49 506 21 Thomas R, Huntley AL, Mann M, et al. Pharmacist-led interventions to reduce  
50  
51  
52 507 unplanned admissions for older people: a systematic review and meta-analysis of  
53  
54  
55 508 randomised controlled trials. *Age Ageing* 2014;43:174-87.  
56  
57  
58  
59  
60

- 1  
2  
3  
4  
5  
6 509 doi:10.1093/ageing/aft169.  
7  
8  
9 510 22 Nazareth I, Burton A, Shulman S, et al. A pharmacy discharge plan for hospitalized  
10  
11 511 elderly patients: a randomized controlled trial. *Age Ageing* 2001;30:33-40.  
12  
13  
14 512 doi:10.1093/ageing/30.1.33.  
15  
16  
17 513 23 Gillespie U, Alassaad A, Henrohn D, et al. A comprehensive pharmacist  
18  
19 514 intervention to reduce morbidity in patients 80 years or older: a randomized  
20  
21 515 controlled trial. *Arch Intern Med* 2009;169(9):894-900.  
22  
23  
24 516 doi:10.1001/archinternmed.2009.71.  
25  
26  
27  
28 517 24 McMahon CG, Cahir CA, Kenny RA, et al. Inappropriate prescribing in older fallers  
29  
30 518 presenting to an Irish emergency department. *Age Ageing* 2014;43:44-50.  
31  
32  
33 519 doi:10.1093/ageing/aft114.  
34  
35  
36  
37 520 25 Kragh A, Elmståhl S, Atroshi I. Older adults' medication use 6 months before and  
38  
39 521 after hip fracture: A population-based cohort study. *J Am Geriatr Soc* 2011;59:863-8.  
40  
41 522 doi:10.1111/j.1532-5415.2011.03372.x.  
42  
43  
44  
45 523 26 Lai SW, Liao KF, Liao CC, et al. Polypharmacy correlates with increased risk for hip  
46  
47 524 fracture in the elderly. A population-based study. *Medicine* 2010;89:295-9.  
48  
49  
50 525 doi:10.1097/MD.0b013e3181f15efc.  
51  
52  
53  
54  
55  
56  
57  
58  
59  
60

- 1  
2  
3  
4  
5  
6 526 27 Chan AW, Tetzlaff JM, Gøtzsche PC, et al. SPIRIT 2013 explanation and  
7  
8  
9 527 elaboration: guidance for protocols of clinical trials. *BMJ* 2013;346:e7586.  
10  
11 528 doi:10.1136/bmj.e7586.  
12  
13  
14 529 28 Gnjjidic D, Hilmer SN, Blyth FM, et al. Polypharmacy cutoff and outcomes: five or  
15  
16  
17 530 more medicines were used to identify community-dwelling older men at risk of  
18  
19  
20 531 different adverse outcomes. *J Clin Epidemiol* 2012;65:989-95.  
21  
22 532 doi:10.1016/j.jclinepi.2012.02.018.  
23  
24  
25 533 29 Nakagawa S, Kume N. Pharmacy practice in Japan. *Can J Hosp Pharm*  
26  
27  
28 534 2017;70(3):232-42. doi:10.4212/cjhp.v70i3.1663.  
29  
30  
31 535 30 Wood L, Egger M, Gluud LL, et al. Empirical evidence of bias in treatment effect  
32  
33  
34 536 estimates in controlled trials with different interventions and outcomes:  
35  
36  
37 537 meta-epidemiological study. *BMJ* 2008;336(7644):601-5.  
38  
39  
40 538 doi:10.1136/bmj.39465.451748.AD.  
41  
42  
43 539 31 Lisby M, Thomsen A, Nielsen LP, et al. The effect of systematic review in elderly  
44  
45  
46 540 patients admitted to an acute ward of internal medicine. *Basic Clin Pharmacol*  
47  
48 541 *Toxicol* 2010;106(5):422-7. doi:10.1111/j.1742-7843.2009.00511.x.  
49  
50  
51  
52  
53  
54  
55  
56  
57  
58  
59  
60

- 1  
2  
3  
4  
5  
6 542 32 McMullin ST, Hennenfent JA, Ritchie DJ, et al. A prospective, randomized trial to  
7  
8  
9 543 assess the cost impact of pharmacist-initiated interventions. *Arch Intern Med*  
10  
11 544 1999;159(19):2306-9. doi:10.1001/archinte.159.19.2306.  
12  
13  
14 545 33 Spinewine A, Swine C, Dhillon S, et al. Effect of a collaborative approach on the  
15  
16  
17 546 quality of prescribing for geriatric inpatients: a randomized, controlled trial. *J Am*  
18  
19  
20 547 *Geriatr Soc* 2007;55(5):658-65. doi:10.1111/j.1532-5415.2007.01132.x.  
21  
22  
23 548 34 Lipton HL, Bird JA. The impact of clinical pharmacists' consultations on geriatric  
24  
25  
26 549 patients' compliance and medical care use: a randomized controlled trial.  
27  
28 550 *Gerontologist* 1994;34(3):307-15. doi:10.1093/geront/34.3.307.  
29  
30  
31  
32  
33  
34  
35  
36  
37  
38  
39  
40  
41  
42  
43  
44  
45  
46  
47  
48  
49  
50  
51  
52  
53  
54  
55  
56  
57  
58  
59  
60

551 **Table 1.** Time schedule of participant enrolment, interventions, and assessments.

|                            | STUDY PERIOD |                                                                                     |                 |       |       |       |
|----------------------------|--------------|-------------------------------------------------------------------------------------|-----------------|-------|-------|-------|
|                            | Enrolment    | Allocation                                                                          | Post-allocation |       |       |       |
| TIMEPOINT*                 | $-t_1$       | 0                                                                                   | $t_1$           | $t_2$ | $t_3$ | $t_4$ |
| <b>ENROLMENT:</b>          |              |                                                                                     |                 |       |       |       |
| Eligibility screen         | X            |                                                                                     |                 |       |       |       |
| Informed consent           | X            |                                                                                     |                 |       |       |       |
| Allocation                 |              | X                                                                                   |                 |       |       |       |
| <b>INTERVENTIONS:</b>      |              |                                                                                     |                 |       |       |       |
| Pharmacist intervention    |              | 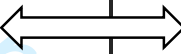   |                 |       |       |       |
| Usual care (control)       |              |  |                 |       |       |       |
| <b>ASSESSMENTS:</b>        |              |                                                                                     |                 |       |       |       |
| Number of medications      | X            |                                                                                     | X               | X     | X     | X     |
| Number of PIP <sup>†</sup> | X            |                                                                                     | X               | X     | X     | X     |
| Number of PPO <sup>†</sup> | X            |                                                                                     | X               | X     | X     | X     |
| Adverse drug events        |              |                                                                                     | X               |       |       |       |
| Discharge destination      |              |                                                                                     | X               |       |       |       |
| Duration of hospital stay  |              |                                                                                     | X               |       |       |       |
| All-cause death            |              |                                                                                     | X               | X     | X     | X     |
| Readmission                |              |                                                                                     |                 | X     | X     | X     |
| ED visit                   |              |                                                                                     |                 | X     | X     | X     |

|                              |  |  |   |   |   |   |
|------------------------------|--|--|---|---|---|---|
| <b>Myocardial infarction</b> |  |  | X | X | X | X |
| <b>Ischaemic stroke</b>      |  |  | X | X | X | X |
| <b>Fracture</b>              |  |  | X | X | X | X |

552 \* $t_1$ , within 72 hours after admission;  $t_1$ , at discharge;  $t_2$ , six months after randomisation;

553  $t_3$ , 12 months after randomisation;  $t_4$ , 24 months after randomisation.

554 †PIP and PPO are defined based on the 2015 STOPP/START Criteria.

555 ED, emergency department; PIP, potentially inappropriate prescribing; PPO, potential

556 prescribing omission.

557

558 **Table 2.** Variables, measures, and analysis methods.

| Variable/outcome                                            | Hypothesis           | Measured outcomes                                                           | Methods of analysis |
|-------------------------------------------------------------|----------------------|-----------------------------------------------------------------------------|---------------------|
| Primary                                                     |                      |                                                                             |                     |
| Readmission* at 12 months                                   | Improvement occurred | Readmission rate % [binary]                                                 | Chi-squared test    |
| Secondary                                                   |                      |                                                                             |                     |
| Number of medications at discharge, at 6, 12, and 24 months | Decline occurred     | Total number of medications [continuous]                                    | T-test              |
| PIP <sup>†</sup> at discharge, at 6, 12, and 24 months      | Decline occurred     | Total number of PIP [continuous]                                            | T-test              |
|                                                             | Improvement occurred | Proportion of patients who take any PIP % [binary]                          | Chi-squared test    |
| PPO <sup>†</sup> at discharge, at 6, 12, and 24 months      | Decline occurred     | Total number of PPO [continuous]                                            | T-test              |
|                                                             | Improvement occurred | Proportion of patients who take any PPO % [binary]                          | Chi-squared test    |
| Readmission* at 6 and 24 months                             | Improvement occurred | Readmission rate % [binary]                                                 | Chi-squared test    |
| ED visit at 6, 12, and 24 months                            | Improvement occurred | Proportion of patients who visit ED % [binary]                              | Chi-squared test    |
| All-cause death at 6, 12, and 24 months                     | Improvement occurred | All-cause mortality % [binary]                                              | Chi-squared test    |
| Acute myocardial infarction at 6, 12, and 24 months         | Improvement occurred | Proportion of patients whom acute myocardial infarction occurred % [binary] | Chi-squared test    |
| Acute ischaemic stroke at 6, 12, and 24 months              | Improvement occurred | Proportion of patients whom acute ischemic stroke occurred % [binary]       | Chi-squared test    |
| Any fractures at 6, 12, and 24 months                       | Improvement occurred | Proportion of patients whom any fractures occurred % [binary]               | Chi-squared test    |

1  
2  
3  
4  
5 559 \*Includes both planned and unplanned hospitalization.  
6

7 560 †PIP and PPO are defined based on the 2015 STOPP/START Criteria.  
8

9 561 ED, emergency department; PIP, potentially inappropriate prescribing; PPO, potential

10 562 prescribing omission.  
11  
12  
13  
14  
15  
16  
17  
18  
19  
20  
21  
22  
23  
24  
25  
26  
27  
28  
29  
30  
31  
32  
33  
34  
35  
36  
37  
38  
39  
40  
41  
42  
43  
44  
45  
46  
47  
48  
49  
50  
51  
52  
53  
54  
55  
56  
57  
58  
59  
60



1  
2  
3  
4  
5  
6  
7  
8  
9  
10  
11  
12  
13  
14  
15  
16  
17  
18  
19  
20  
21  
22  
23  
24  
25  
26  
27  
28  
29  
30  
31  
32  
33  
34  
35  
36  
37  
38  
39  
40  
41  
42  
43  
44  
45  
46  
47  
48  
49  
50  
51  
52  
53  
54  
55  
56  
57  
58  
59  
60

563 **Figure 1.** Flow diagram of the participant.

For peer review only

564

For peer review only

1  
2  
3  
4  
5  
6  
7  
8  
9  
10  
11  
12  
13  
14  
15  
16  
17  
18  
19  
20  
21  
22  
23  
24  
25  
26  
27  
28  
29  
30  
31  
32  
33  
34  
35  
36  
37  
38  
39  
40  
41  
42  
43  
44  
45  
46  
47  
48  
49  
50  
51  
52  
53  
54  
55  
56  
57  
58  
59  
60

1  
2  
3  
4  
5  
6  
7  
8  
9  
10  
11  
12  
13  
14  
15  
16  
17  
18  
19  
20  
21  
22  
23  
24  
25  
26  
27  
28  
29  
30  
31  
32  
33  
34  
35  
36  
37  
38  
39  
40  
41  
42  
43  
44  
45  
46  
47  
48  
49  
50  
51  
52  
53  
54  
55  
56  
57  
58  
59  
60

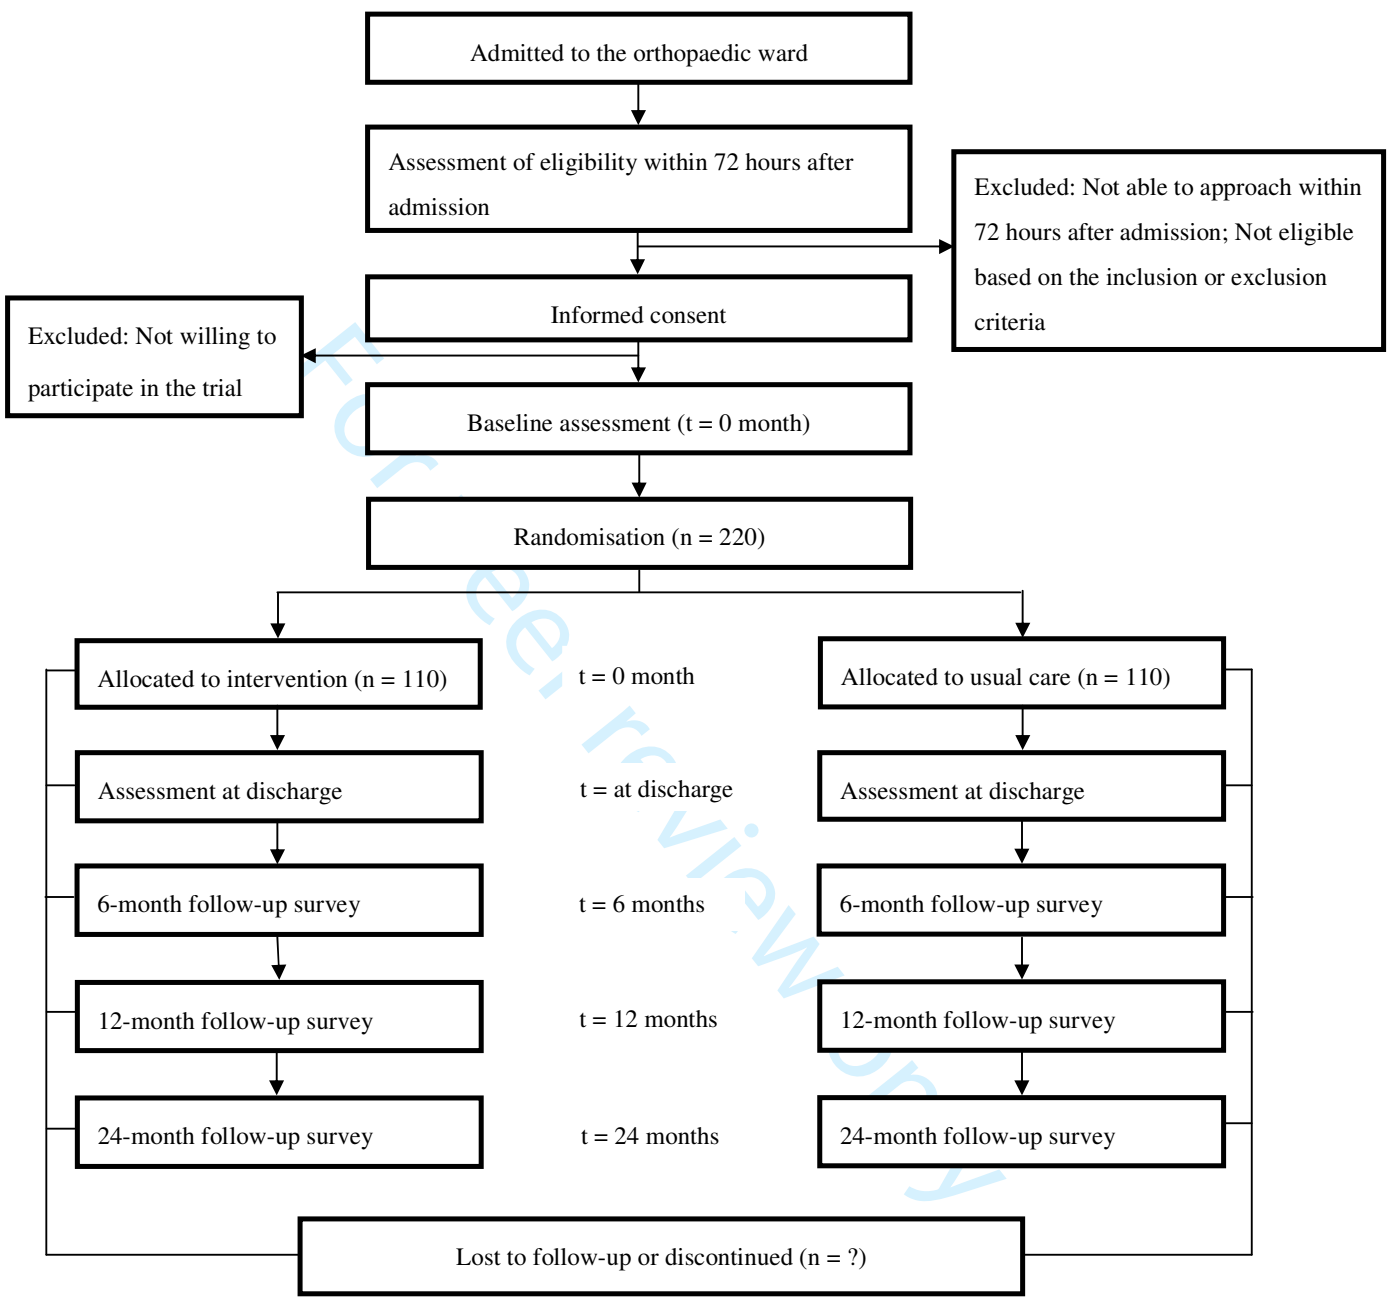

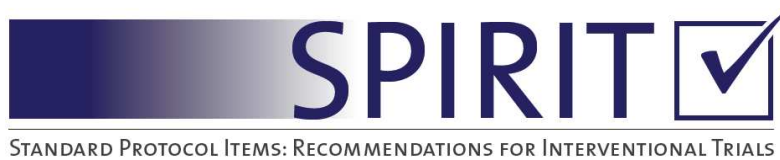

SPIRIT 2013 Checklist: Recommended items to address in a clinical trial protocol and related documents\*

| Section/item                      | Item No | Description                                                                                                                                                                                                                                                                              | Page Number on which item is reported |
|-----------------------------------|---------|------------------------------------------------------------------------------------------------------------------------------------------------------------------------------------------------------------------------------------------------------------------------------------------|---------------------------------------|
| <b>Administrative information</b> |         |                                                                                                                                                                                                                                                                                          |                                       |
| Title                             | 1       | Descriptive title identifying the study design, population, interventions, and, if applicable, trial acronym                                                                                                                                                                             | 1                                     |
| Trial registration                | 2a      | Trial identifier and registry name. If not yet registered, name of intended registry                                                                                                                                                                                                     | 4                                     |
|                                   | 2b      | All items from the World Health Organization Trial Registration Data Set                                                                                                                                                                                                                 | 4                                     |
| Protocol version                  | 3       | Date and version identifier                                                                                                                                                                                                                                                              | NA                                    |
| Funding                           | 4       | Sources and types of financial, material, and other support                                                                                                                                                                                                                              | 27                                    |
| Roles and responsibilities        | 5a      | Names, affiliations, and roles of protocol contributors                                                                                                                                                                                                                                  | 27                                    |
|                                   | 5b      | Name and contact information for the trial sponsor                                                                                                                                                                                                                                       | NA                                    |
|                                   | 5c      | Role of study sponsor and funders, if any, in study design; collection, management, analysis, and interpretation of data; writing of the report; and the decision to submit the report for publication, including whether they will have ultimate authority over any of these activities | NA                                    |
|                                   | 5d      | Composition, roles, and responsibilities of the coordinating centre, steering committee, endpoint adjudication committee, data management team, and other individuals or groups overseeing the trial, if applicable (see Item 21a for data monitoring committee)                         | NA                                    |
| <b>Introduction</b>               |         |                                                                                                                                                                                                                                                                                          |                                       |

|                                                                                                                                  |                                                           |     |                                                                                                                                                                                                                                                                                                                                                                                |       |
|----------------------------------------------------------------------------------------------------------------------------------|-----------------------------------------------------------|-----|--------------------------------------------------------------------------------------------------------------------------------------------------------------------------------------------------------------------------------------------------------------------------------------------------------------------------------------------------------------------------------|-------|
| 1<br>2<br>3<br>4<br>5<br>6                                                                                                       | Background and rationale                                  | 6a  | Description of research question and justification for undertaking the trial, including summary of relevant studies (published and unpublished) examining benefits and harms for each intervention                                                                                                                                                                             | 6-9   |
| 7<br>8                                                                                                                           |                                                           | 6b  | Explanation for choice of comparators                                                                                                                                                                                                                                                                                                                                          | 17    |
| 9<br>10                                                                                                                          | Objectives                                                | 7   | Specific objectives or hypotheses                                                                                                                                                                                                                                                                                                                                              | 8-9   |
| 11<br>12<br>13<br>14<br>15                                                                                                       | Trial design                                              | 8   | Description of trial design including type of trial (eg, parallel group, crossover, factorial, single group), allocation ratio, and framework (eg, superiority, equivalence, noninferiority, exploratory)                                                                                                                                                                      | 10    |
| 16<br>17                                                                                                                         | <b>Methods: Participants, interventions, and outcomes</b> |     |                                                                                                                                                                                                                                                                                                                                                                                |       |
| 18<br>19<br>20<br>21<br>22<br>23                                                                                                 | Study setting                                             | 9   | Description of study settings (eg, community clinic, academic hospital) and list of countries where data will be collected. Reference to where list of study sites can be obtained                                                                                                                                                                                             | 11    |
| 24<br>25<br>26<br>27<br>28                                                                                                       | Eligibility criteria                                      | 10  | Inclusion and exclusion criteria for participants. If applicable, eligibility criteria for study centres and individuals who will perform the interventions (eg, surgeons, psychotherapists)                                                                                                                                                                                   | 11-12 |
| 29<br>30<br>31<br>32<br>33<br>34<br>35<br>36<br>37<br>38                                                                         | Interventions                                             | 11a | Interventions for each group with sufficient detail to allow replication, including how and when they will be administered                                                                                                                                                                                                                                                     | 14-16 |
|                                                                                                                                  |                                                           | 11b | Criteria for discontinuing or modifying allocated interventions for a given trial participant (eg, drug dose change in response to harms, participant request, or improving/worsening disease)                                                                                                                                                                                 | 17    |
|                                                                                                                                  |                                                           | 11c | Strategies to improve adherence to intervention protocols, and any procedures for monitoring adherence (eg, drug tablet return, laboratory tests)                                                                                                                                                                                                                              | NA    |
|                                                                                                                                  |                                                           | 11d | Relevant concomitant care and interventions that are permitted or prohibited during the trial                                                                                                                                                                                                                                                                                  | 16-17 |
| 39<br>40<br>41<br>42<br>43<br>44<br>45<br>46<br>47<br>48<br>49<br>50<br>51<br>52<br>53<br>54<br>55<br>56<br>57<br>58<br>59<br>60 | Outcomes                                                  | 12  | Primary, secondary, and other outcomes, including the specific measurement variable (eg, systolic blood pressure), analysis metric (eg, change from baseline, final value, time to event), method of aggregation (eg, median, proportion), and time point for each outcome. Explanation of the clinical relevance of chosen efficacy and harm outcomes is strongly recommended | 18-19 |

|                                                                     |     |                                                                                                                                                                                                                                                                                                                                                          |                          |
|---------------------------------------------------------------------|-----|----------------------------------------------------------------------------------------------------------------------------------------------------------------------------------------------------------------------------------------------------------------------------------------------------------------------------------------------------------|--------------------------|
| Participant timeline                                                | 13  | Time schedule of enrolment, interventions (including any run-ins and washouts), assessments, and visits for participants. A schematic diagram is highly recommended (see Figure)                                                                                                                                                                         | 17-18, Figure 1, Table 1 |
| Sample size                                                         | 14  | Estimated number of participants needed to achieve study objectives and how it was determined, including clinical and statistical assumptions supporting any sample size calculations                                                                                                                                                                    | 12, 20                   |
| Recruitment                                                         | 15  | Strategies for achieving adequate participant enrolment to reach target sample size                                                                                                                                                                                                                                                                      | 12-13                    |
| <b>Methods: Assignment of interventions (for controlled trials)</b> |     |                                                                                                                                                                                                                                                                                                                                                          |                          |
| Allocation:                                                         |     |                                                                                                                                                                                                                                                                                                                                                          |                          |
| Sequence generation                                                 | 16a | Method of generating the allocation sequence (eg, computer-generated random numbers), and list of any factors for stratification. To reduce predictability of a random sequence, details of any planned restriction (eg, blocking) should be provided in a separate document that is unavailable to those who enrol participants or assign interventions | 13-14                    |
| Allocation concealment mechanism                                    | 16b | Mechanism of implementing the allocation sequence (eg, central telephone; sequentially numbered, opaque, sealed envelopes), describing any steps to conceal the sequence until interventions are assigned                                                                                                                                                | 13-14                    |
| Implementation                                                      | 16c | Who will generate the allocation sequence, who will enrol participants, and who will assign participants to interventions                                                                                                                                                                                                                                | 13-14                    |
| Blinding (masking)                                                  | 17a | Who will be blinded after assignment to interventions (eg, trial participants, care providers, outcome assessors, data analysts), and how                                                                                                                                                                                                                | 14                       |
|                                                                     | 17b | If blinded, circumstances under which unblinding is permissible, and procedure for revealing a participant's allocated intervention during the trial                                                                                                                                                                                                     | NA                       |
| <b>Methods: Data collection, management, and analysis</b>           |     |                                                                                                                                                                                                                                                                                                                                                          |                          |

|                                                                      |                            |     |                                                                                                                                                                                                                                                                                                                                                                                                              |                |
|----------------------------------------------------------------------|----------------------------|-----|--------------------------------------------------------------------------------------------------------------------------------------------------------------------------------------------------------------------------------------------------------------------------------------------------------------------------------------------------------------------------------------------------------------|----------------|
| 1<br>2<br>3<br>4<br>5<br>6<br>7<br>8<br>9<br>10                      | Data collection methods    | 18a | Plans for assessment and collection of outcome, baseline, and other trial data, including any related processes to promote data quality (eg, duplicate measurements, training of assessors) and a description of study instruments (eg, questionnaires, laboratory tests) along with their reliability and validity, if known. Reference to where data collection forms can be found, if not in the protocol | 17-18          |
| 11<br>12<br>13<br>14<br>15<br>16                                     |                            | 18b | Plans to promote participant retention and complete follow-up, including list of any outcome data to be collected for participants who discontinue or deviate from intervention protocols                                                                                                                                                                                                                    | 18             |
| 17<br>18<br>19<br>20<br>21<br>22<br>23<br>24                         | Data management            | 19  | Plans for data entry, coding, security, and storage, including any related processes to promote data quality (eg, double data entry; range checks for data values). Reference to where details of data management procedures can be found, if not in the protocol                                                                                                                                            | 21             |
| 25<br>26<br>27<br>28<br>29                                           | Statistical methods        | 20a | Statistical methods for analysing primary and secondary outcomes. Reference to where other details of the statistical analysis plan can be found, if not in the protocol                                                                                                                                                                                                                                     | 20-21, Table 2 |
| 30<br>31<br>32                                                       |                            | 20b | Methods for any additional analyses (eg, subgroup and adjusted analyses)                                                                                                                                                                                                                                                                                                                                     | 20-21, Table 2 |
| 33<br>34<br>35<br>36<br>37<br>38                                     |                            | 20c | Definition of analysis population relating to protocol non-adherence (eg, as randomised analysis), and any statistical methods to handle missing data (eg, multiple imputation)                                                                                                                                                                                                                              | 21             |
| 39                                                                   | <b>Methods: Monitoring</b> |     |                                                                                                                                                                                                                                                                                                                                                                                                              |                |
| 40<br>41<br>42<br>43<br>44<br>45<br>46<br>47<br>48                   | Data monitoring            | 21a | Composition of data monitoring committee (DMC); summary of its role and reporting structure; statement of whether it is independent from the sponsor and competing interests; and reference to where further details about its charter can be found, if not in the protocol. Alternatively, an explanation of why a DMC is not needed                                                                        | 22             |
| 49<br>50<br>51<br>52<br>53<br>54<br>55<br>56<br>57<br>58<br>59<br>60 |                            | 21b | Description of any interim analyses and stopping guidelines, including who will have access to these interim results and make the final decision to terminate the trial                                                                                                                                                                                                                                      | NA             |

|                                 |     |                                                                                                                                                                                                                                                                                     |       |
|---------------------------------|-----|-------------------------------------------------------------------------------------------------------------------------------------------------------------------------------------------------------------------------------------------------------------------------------------|-------|
| Harms                           | 22  | Plans for collecting, assessing, reporting, and managing solicited and spontaneously reported adverse events and other unintended effects of trial interventions or trial conduct                                                                                                   | 22-23 |
| Auditing                        | 23  | Frequency and procedures for auditing trial conduct, if any, and whether the process will be independent from investigators and the sponsor                                                                                                                                         | 23    |
| <b>Ethics and dissemination</b> |     |                                                                                                                                                                                                                                                                                     |       |
| Research ethics approval        | 24  | Plans for seeking research ethics committee/institutional review board (REC/IRB) approval                                                                                                                                                                                           | 23    |
| Protocol amendments             | 25  | Plans for communicating important protocol modifications (eg, changes to eligibility criteria, outcomes, analyses) to relevant parties (eg, investigators, REC/IRBs, trial participants, trial registries, journals, regulators)                                                    | 23-24 |
| Consent or assent               | 26a | Who will obtain informed consent or assent from potential trial participants or authorised surrogates, and how (see Item 32)                                                                                                                                                        | 24    |
|                                 | 26b | Additional consent provisions for collection and use of participant data and biological specimens in ancillary studies, if applicable                                                                                                                                               | NA    |
| Confidentiality                 | 27  | How personal information about potential and enrolled participants will be collected, shared, and maintained in order to protect confidentiality before, during, and after the trial                                                                                                | 24    |
| Declaration of interests        | 28  | Financial and other competing interests for principal investigators for the overall trial and each study site                                                                                                                                                                       | 27    |
| Access to data                  | 29  | Statement of who will have access to the final trial dataset, and disclosure of contractual agreements that limit such access for investigators                                                                                                                                     | 21    |
| Ancillary and post-trial care   | 30  | Provisions, if any, for ancillary and post-trial care, and for compensation to those who suffer harm from trial participation                                                                                                                                                       | NA    |
| Dissemination policy            | 31a | Plans for investigators and sponsor to communicate trial results to participants, healthcare professionals, the public, and other relevant groups (eg, via publication, reporting in results databases, or other data sharing arrangements), including any publication restrictions | 24    |



|                            |     |                                                                                                                                                                                                |    |
|----------------------------|-----|------------------------------------------------------------------------------------------------------------------------------------------------------------------------------------------------|----|
|                            | 31b | Authorship eligibility guidelines and any intended use of professional writers                                                                                                                 | NA |
|                            | 31c | Plans, if any, for granting public access to the full protocol, participant-level dataset, and statistical code                                                                                | NA |
| <b>Appendices</b>          |     |                                                                                                                                                                                                |    |
| Informed consent materials | 32  | Model consent form and other related documentation given to participants and authorised surrogates                                                                                             | NA |
| Biological specimens       | 33  | Plans for collection, laboratory evaluation, and storage of biological specimens for genetic or molecular analysis in the current trial and for future use in ancillary studies, if applicable | NA |

\*It is strongly recommended that this checklist be read in conjunction with the SPIRIT 2013 Explanation & Elaboration for important clarification on the items. Amendments to the protocol should be tracked and dated. The SPIRIT checklist is copyrighted by the SPIRIT Group under the Creative Commons "[Attribution-NonCommercial-NoDerivs 3.0 Unported](https://creativecommons.org/licenses/by-nc-nd/3.0/)" license.

# BMJ Open

**A study protocol for a single-centre, prospective, non-blinded, randomised, 12-month, parallel-group superiority study to compare the efficacy of pharmacist intervention versus usual care for elderly patients hospitalised in orthopaedic wards**

|                                 |                                                                                                                                                                                                                                                                                                                                                            |
|---------------------------------|------------------------------------------------------------------------------------------------------------------------------------------------------------------------------------------------------------------------------------------------------------------------------------------------------------------------------------------------------------|
| Journal:                        | <i>BMJ Open</i>                                                                                                                                                                                                                                                                                                                                            |
| Manuscript ID                   | bmjopen-2018-021924.R1                                                                                                                                                                                                                                                                                                                                     |
| Article Type:                   | Protocol                                                                                                                                                                                                                                                                                                                                                   |
| Date Submitted by the Author:   | 20-Mar-2018                                                                                                                                                                                                                                                                                                                                                |
| Complete List of Authors:       | Komagamine, Junpei; National Hospital Organization Tochigi Medical Center, Internal Medicine<br>Sugawara, Kenichi; National Hospital Organization Tochigi Medical Center, Pharmacy<br>Kaminaga, Miho; National Hospital Organization Tochigi Medical Center, Pharmacy<br>Tatsumi, Shinpei; National Hospital Organization Tochigi Medical Center, Pharmacy |
| <b>Primary Subject Heading</b>: | Geriatric medicine                                                                                                                                                                                                                                                                                                                                         |
| Secondary Subject Heading:      | Pharmacology and therapeutics                                                                                                                                                                                                                                                                                                                              |
| Keywords:                       | CLINICAL PHARMACOLOGY, ORTHOPAEDIC & TRAUMA SURGERY, GERIATRIC MEDICINE                                                                                                                                                                                                                                                                                    |
|                                 |                                                                                                                                                                                                                                                                                                                                                            |

SCHOLARONE™  
Manuscripts

1 **A study protocol for a single-centre, prospective, non-blinded, randomised,**  
2 **12-month, parallel-group superiority study to compare the efficacy of pharmacist**  
3 **intervention *versus* usual care for elderly patients hospitalised in orthopaedic**  
4 **wards**

5  
6 Junpei Komagamine, MD<sup>1</sup>; Kenichi Sugawara<sup>2</sup>; Miho Kaminaga<sup>2</sup>; Shinpei Tatsumi<sup>2</sup>

7  
8 <sup>1</sup>Department of Internal Medicine, National Hospital Organization Tochigi Medical  
9 Center, 1-10-37, Nakatomatsuri, Utsunomiya, Tochigi 3208580, Japan.

10 <sup>2</sup>Department of Pharmacy, National Hospital Organization Tochigi Medical Center,  
11 1-10-37, Nakatomatsuri, Utsunomiya, Tochigi 3208580, Japan.

12  
13 **Running title:** Pharmacist interventions

14 **Word count:** 278 (abstract) and 3671 (main text)

15 **Source of support:** None

16

- 1  
2  
3  
4  
5  
6 17 **Corresponding author:** Junpei Komagamine, MD, Department of Internal Medicine,  
7  
8  
9 18 National Hospital Organization Tochigi Medical Center, 1-10-37, Nakatomatsuri,  
10  
11 19 Utsunomiya, Tochigi 3208580, Japan.  
12  
13  
14 20 **Tel.:** +81-28-622-5241, **E-mail:** junpei0919@yahoo.co.jp  
15  
16  
17  
18  
19  
20  
21  
22  
23  
24  
25  
26  
27  
28  
29  
30  
31  
32  
33  
34  
35  
36  
37  
38  
39  
40  
41  
42  
43  
44  
45  
46  
47  
48  
49  
50  
51  
52  
53  
54  
55  
56  
57  
58  
59  
60

1  
2  
3  
4  
5  
6 21 **ABSTRACT**

7  
8 22 **Introduction:** Given that polypharmacy and potentially inappropriate prescribing are  
9  
10  
11 23 common in elderly orthopaedic patients, pharmacist interventions to improve  
12  
13  
14 24 medication practices among this population are important. However, past studies have  
15  
16  
17 25 reported mixed results regarding the effectiveness of pharmacist-led interventions in  
18  
19  
20 26 inpatient elderly care. Furthermore, few randomised controlled trials have evaluated  
21  
22  
23 27 patient-relevant outcomes as a primary endpoint. Therefore, we will evaluate whether a  
24  
25  
26 28 pharmacist-led intervention could reduce readmission of hospitalised elderly  
27  
28  
29 29 orthopaedic patients with polypharmacy or potentially inappropriate prescribing.

30 30 **Methods and analysis:** This is an ongoing single-centre, prospective, non-blinded,  
31  
32  
33 31 randomised controlled trial designed to evaluate the superiority of a pharmacist-led  
34  
35  
36 32 intervention for hospitalised elderly patients compared with usual care. The trial will  
37  
38  
39 33 include newly admitted orthopaedic patients 70 years of age and older with  
40  
41  
42 34 polypharmacy or at least one potentially inappropriate prescription, as identified by the  
43  
44  
45 35 2015 STOPP criteria. Usual care includes medication reconciliation, patient education,  
46  
47  
48 36 and monitoring, as well as providing information about discharge medications.  
49  
50  
51 37 Pharmacist interventions, in addition to usual care, include advising the patient's  
52  
53  
54 38 physician to stop unnecessary or inappropriate medications and start necessary  
55  
56  
57  
58  
59  
60

1  
2  
3  
4  
5  
6 39 medications. The primary outcome is the one-year readmission rate. Secondary  
7  
8  
9 40 outcomes are the proportion of patients who undergo emergency department visits and  
10  
11 41 the occurrences of all-cause death, a new fracture, myocardial infarction, and ischaemic  
12  
13  
14 42 stroke. The study started in November 2017, and up to approximately 220 patients will  
15  
16  
17 43 be enrolled.

18  
19  
20 44 **Ethics and dissemination:** The protocol was approved by the Medical Ethics  
21  
22 45 Committee of the National Hospital Organization Tochigi Medical Center (No. 29-22).  
23  
24  
25 46 The trial was registered at the UMIN clinical registry. The results of this trial will be  
26  
27  
28 47 submitted for publication in a peer-reviewed journal.

29  
30  
31 48 **Trial registration number:** UMIN000029404 (registered October 3, 2017).  
32  
33

34  
35  
36  
37 50 **Key words:** Emergency, Orthopaedic ward, Pharmacist intervention, Polypharmacy,  
38  
39 51 Potentially inappropriate prescribing  
40  
41

42  
43 52

#### 44 45 53 **Strengths and limitations of this study**

- 46  
47  
48 54 ● This randomised controlled trial will evaluate the effectiveness of pharmacist  
49  
50  
51 55 interventions for hospitalised orthopaedic elderly patients, using  
52  
53  
54 56 patient-relevant outcomes as the primary outcomes.

- 1  
2  
3  
4  
5  
6 57 ● This is a single-centre study with a small sample size and short-term  
7  
8  
9 58 follow-up.  
10  
11 59 ● Orthopaedic patients who are admitted electively or discharged within less  
12  
13  
14 60 than seven days after admission will be excluded.  
15  
16  
17 61 ● Orthopaedic patients who are prescribed fewer than five medications and are  
18  
19  
20 62 taking no potentially inappropriate medications at admission will be excluded.  
21  
22  
23  
24  
25  
26  
27  
28  
29  
30  
31  
32  
33  
34  
35  
36  
37  
38  
39  
40  
41  
42  
43  
44  
45  
46  
47  
48  
49  
50  
51  
52  
53  
54  
55  
56  
57  
58  
59  
60

## 63 INTRODUCTION

64 In recent decades, as the population has aged, polypharmacy and multi-morbidities have  
65 become more complicated problems among elderly patients.[1-3] Polypharmacy in  
66 elderly patients is associated with inappropriate prescribing[4] and adverse events, such  
67 as adverse drug events and death.[5] Because adverse drug events are a primary cause  
68 of preventable hospital admissions among elderly patients,[6] strategies to prevent  
69 drug-related events has been proposed in recent decades.[7-9] These strategies include  
70 deprescribing for polypharmacy[9] and reducing potentially inappropriate prescribing  
71 and potential prescription omissions.[7,8]

72 Polypharmacy and potentially inappropriate prescribing among elderly patients  
73 are particularly common in acute care settings compared with primary care  
74 settings.[10-12] Therefore, it is important to improve the appropriateness of medications  
75 used during hospitalisation. In fact, the American College of Emergency Physicians  
76 Geriatric Emergency Department Guidelines recommend a multidisciplinary team  
77 intervention for all elderly patients who present to the emergency department and are  
78 prescribed more than five medications or at least one potentially inappropriate  
79 medication, regardless of the presenting complaint.[13] Given that physicians are often  
80 unaware of adverse drug events,[14,15] the role of hospital pharmacists in improving



1  
2  
3  
4  
5  
6 81 polypharmacy and potentially inappropriate prescribing in hospitalised elderly patients  
7  
8 82 is important. Nonetheless, past studies have reported mixed results regarding the  
9  
10  
11 83 effectiveness of a pharmacist-led intervention in improving the appropriateness of  
12  
13  
14 84 medications in inpatient elderly care. Although pharmacist intervention can improve the  
15  
16  
17 85 appropriateness of medications in hospitalised elderly patients,[16] the conclusions of  
18  
19  
20 86 past systematic reviews and meta-analyses have been inconsistent regarding whether  
21  
22  
23 87 patient-relevant outcomes, such as mortality and readmission, were improved by these  
24  
25  
26 88 interventions.[17-20] One recent meta-analysis that included seven randomised  
27  
28  
29 89 controlled trials that evaluated the effectiveness of a pharmacist-led intervention in  
30  
31  
32 90 inpatient elderly care also reported little impact of pharmacist interventions on  
33  
34  
35 91 readmission rates.[21] However, most trials included in this meta-analysis were  
36  
37  
38 92 considered to have a high risk of bias. Furthermore, only two of the seven randomised  
39  
40  
41 93 controlled trials included in the meta-analysis evaluated patient-relevant outcomes as  
42  
43  
44 94 primary endpoints.[22,23] In one of those two trials, a comprehensive pharmacist  
45  
46  
47 95 intervention for hospitalised elderly patients with polypharmacy led to a significant  
48  
49  
50 96 reduction in hospital visits.[23] Therefore, it is still too early to conclude that  
51  
52  
53 97 pharmacist-led interventions for hospitalised elderly patients do not improve  
54  
55  
56 98 patient-relevant outcomes. Furthermore, most studies have targeted internal medicine

1  
2  
3  
4  
5  
6 99 patients, while few studies have ever investigated the effectiveness of pharmacist  
7  
8  
9 100 interventions for elderly patients hospitalised in an orthopaedic ward.[21] The  
10  
11 101 prevalence of polypharmacy and potentially inappropriate prescribing are particularly  
12  
13  
14 102 high in elderly orthopaedic patients, and these practices often continue after recovery  
15  
16  
17 103 from a fracture.[24,25] Furthermore, polypharmacy is associated with an increased risk  
18  
19  
20 104 of fall and fracture.[5,26] Therefore, pharmacist interventions for improving the  
21  
22  
23 105 appropriateness of medications in hospitalised elderly orthopaedic patients may be  
24  
25  
26 106 associated with better patient outcomes compared with other settings. Thus, we will  
27  
28  
29 107 conduct a randomised controlled trial to evaluate whether a pharmacist-led intervention  
30  
31  
32 108 reduces readmission in hospitalised elderly orthopaedic patients with polypharmacy or  
33  
34  
35 109 potentially inappropriate prescribing.  
36  
37  
38 110  
39  
40

## 111 **Objectives**

### 112 *Primary objective*

113 Our primary objective is to determine whether pharmacist intervention for elderly  
114 orthopaedic patients with polypharmacy or potentially inappropriate prescribing at  
115 admission reduces one-year readmission rates compared with usual care. Based on a

1  
2  
3  
4  
5  
6 116 past study,[23] we selected a readmission time frame of one year for the primary

7  
8  
9 117 objective.

10  
11  
12 118

13  
14  
15  
16 119 *Secondary objectives*

17  
18  
19 120 The key secondary objectives are to determine whether pharmacist intervention for

20  
21  
22 121 elderly orthopaedic patients with polypharmacy or potentially inappropriate prescribing

23  
24  
25 122 at admission reduces patient-relevant outcomes, such as all-cause death, myocardial

26  
27  
28 123 infarction, ischaemic stroke, and any fractures, compared with usual care. Other

29  
30  
31 124 secondary objectives are to determine whether pharmacist intervention for elderly

32  
33  
34 125 orthopaedic patients with polypharmacy or potentially inappropriate prescribing at

35  
36  
37 126 admission reduces the total number of medications, potentially inappropriate

38  
39 127 prescribing, and potential prescription omissions.

40  
41  
42  
43 128

44  
45  
46 129 **Literature search and review**

47  
48  
49  
50 130 We performed a literature search and review of pharmacist interventions in elderly

51  
52  
53 131 hospitalised orthopaedic patients. We used the terms “pharmacist”, “polypharmacy”,

1  
2  
3  
4  
5  
6 132 “medication review”, and “inappropriate prescribing” alone and in combination to  
7  
8  
9 133 search the PubMed and Google Scholar databases until 5 August 2017 without limits for  
10  
11 134 the year when the articles were published. We restricted our review to full-text articles  
12  
13  
14 135 published in English or Japanese. We also identified references from the relevant  
15  
16  
17 136 articles. We primarily selected randomised controlled trials, systematic reviews, and  
18  
19  
20 137 meta-analyses. We found a recent systematic review regarding the effectiveness of  
21  
22  
23 138 pharmacist-led intervention on patient outcomes in elderly hospitalised patients.[21]  
24  
25  
26 139 Based on this systematic review, we designed this trial.  
27  
28  
29  
30  
31

## 32 141 **METHODS AND ANALYSIS**

### 33 34 35 142 **Trial design**

36  
37 143 This study is a single-centre, prospective, non-blinded, randomised, controlled,  
38  
39  
40 144 superiority trial with two parallel groups. All participants who provide consent for  
41  
42  
43 145 participation and fulfil the inclusion criteria will be randomly assigned to the pharmacist  
44  
45  
46 146 intervention group or the usual care group with a 1:1 allocation. The study was  
47  
48  
49 147 approved by the Medical Ethics Committee of the National Hospital Organization  
50  
51  
52 148 Tochigi Medical Center (No. 29-22) and will be conducted in accordance with the  
53  
54  
55 149 Declaration of Helsinki. Standard Protocol Items: The Recommendations for  
56  
57  
58  
59  
60

1  
2  
3  
4  
5  
6 150 Interventional Trials (SPIRIT checklist)[27] was followed in designing the study  
7  
8  
9 151 protocol (supplementary appendix). Figure 1 summarises the design of the trial, and  
10  
11  
12 152 each of the trial aspects is described in detail below.  
13  
14  
15  
16  
17  
18

19 154 **Study setting**

20  
21  
22 155 This study will be conducted in the orthopaedic ward at the National Hospital  
23  
24  
25 156 Organization Tochigi Medical Center. Our hospital is a 350-bed acute care community  
26  
27  
28 157 hospital and is one of five main hospitals that serve approximately 0.5 million  
29  
30  
31 158 individuals in Utsunomiya in the Tochigi prefecture in Japan.  
32  
33  
34  
35  
36

37 160 **Eligibility criteria**

38  
39  
40 161 Eligible patients are those who meet all the following inclusion criteria and who do not  
41  
42  
43 162 have any listed exclusion criteria. Based on the American College of Emergency  
44  
45  
46 163 Physicians Geriatric Emergency Department Guidelines,[11] the number of medications  
47  
48  
49 164 taken or the presence of potentially inappropriate prescribing at admission will be used  
50  
51  
52 165 as the inclusion criteria. However, the minimum number of medications for inclusion  
53  
54  
55 166 will be five, based on a past study showing that taking five or more medications was a  
56  
57  
58  
59  
60

1  
2  
3  
4  
5  
6 167 useful parameter for estimating medication-related adverse effects related to frailty,  
7  
8  
9 168 disability, and mortality among men aged 70 years and older.[28] As-needed  
10  
11 169 medications will be not be counted.  
12  
13  
14  
15

16  
17 170

18  
19  
20 171 *Inclusion criteria*

21 172 1. Age 70 years and older

22  
23 173 2. Polypharmacy (defined as 5 or more medications) or at least one potentially

24  
25 174 inappropriate prescription (as defined by the 2015 STOPP criteria[8]) upon

26  
27  
28 175 admission  
29  
30

31 176

32  
33  
34 177 *Exclusion criteria*

35  
36  
37 178 1. Elective admission

38  
39 179 2. Inability to contact patient within 72 hours after their admission

40  
41 180 3. Expected hospital stay duration of < one week  
42  
43  
44

45 181

46  
47  
48 182 **Study duration, enrolment and number of sites**

49  
50  
51 183 The study will be conducted at a single hospital in Japan. The planned sample size is

52  
53 184 approximately 220 patients. This study began after November 2017. The planned  
54  
55  
56  
57  
58  
59  
60

1  
2  
3  
4  
5  
6 185 follow-up duration for each patient will be two years after the randomisation. Our  
7  
8  
9 186 investigation period is projected to be three years. However, unless we can recruit the  
10  
11  
12 187 planned number of patients within three years after beginning this study, we will extend  
13  
14  
15 188 the investigation duration to achieve the planned number of patients.  
16  
17

18  
19  
20  
21 189

### 22 **Screening and registration**

23  
24 191 All elderly patients who are hospitalised in an orthopaedic ward in our hospital will be  
25  
26 192 screened for eligibility for the trial by one of three pharmacists (KS, ST, or MK) every  
27  
28  
29 193 weekday morning. Patients who are hospitalised on weekends will be screened on the  
30  
31  
32 194 following Monday morning. If the screened patients are not eligible, we will document  
33  
34  
35 195 the reason for ineligibility for the trial and the number of ineligible patients. All patients  
36  
37  
38 196 who fulfil the inclusion criteria and have no exclusion criteria will be registered by one  
39  
40  
41 197 of three pharmacists in the central data centre at the National Hospital Organization  
42  
43  
44 198 Tochigi Medical Center. Unless written informed consent is provided by the patients,  
45  
46  
47 199 we will document the reasons why the patients did not provide consent to participate in  
48  
49 200 the trial and document the number of patients who declined to participate in the trial.  
50  
51

52  
53 201  
54  
55  
56  
57  
58  
59  
60

1  
2  
3  
4  
5  
6 202 **Randomisation and allocation concealment**  
7

8  
9 203 All patients who provide consent for participation and who fulfil the inclusion criteria  
10  
11  
12 204 will be randomised. Randomisation will be requested by one of three pharmacists (KS,  
13  
14  
15 205 ST, or MK) to the independent randomisation centre at the National Hospital  
16  
17  
18 206 Organization Tochigi Medical Center via webmail. Participants will be randomly  
19  
20  
21 207 assigned to either the pharmacist intervention group or the usual care group.  
22  
23  
24 208 Randomisation will be performed as block randomisation with a 1:1 allocation. The  
25  
26  
27 209 computer-generated random allocation sequence will be provided by an independent  
28  
29  
30 210 staff pharmacist who is not involved in the treatment of patients or with the assessment  
31  
32  
33 211 of patient outcomes. The randomisation will not be stratified. The block sizes will be  
34  
35  
36 212 concealed until the primary outcome is analysed. Throughout the study, the  
37  
38  
39 213 randomisation list will also be concealed until the end of the study.  
40

41 214

42  
43  
44  
45 215 **Blinding**  
46

47  
48 216 Due to the nature of the intervention, neither the participants nor the clinical  
49  
50  
51 217 pharmacists can be blinded to the allocation. Patients will be informed of the group to  
52  
53  
54 218 which they have been randomly allocated. Assessments regarding the outcomes will be  
55  
56  
57  
58  
59  
60



1  
2  
3  
4  
5  
6 219 conducted by an assessor who knows the treatment allocation. The analysis regarding  
7  
8 220 the primary outcome will be conducted by independent investigators who are blinded to  
9  
10  
11 221 the treatment allocation and are not involved in the assessment of patient outcomes.  
12  
13  
14  
15 222

### 18 223 **Pharmacist intervention group**

19  
20  
21  
22 224 Before starting the study, three study pharmacists (KS, ST, and MK) were trained  
23  
24  
25 225 during a three-month period from May 2017 to July 2017. To standardise the  
26  
27  
28 226 intervention by these pharmacists, approximately 16 sessions (one hour per session)  
29  
30  
31 227 regarding medication use in elderly patients based on the 2015 STOPP/START  
32  
33 228 criteria[8] were provided by one internal medicine physician (JK). Therefore, these  
34  
35  
36 229 pharmacists will perform the interventions by following the 2015 STOPP/START  
37  
38  
39 230 criteria. However, the use of these criteria for the pharmacist intervention will not be  
40  
41  
42 231 mandatory because some criteria have uncertain applicability to Japanese patients. For  
43  
44  
45 232 example, according to the 2015 START criteria, statin therapy is recommended for  
46  
47  
48 233 patients with a past history of cerebral vascular disease unless the patient's status is  
49  
50  
51 234 end-of-life or the patient is aged >85 years. However, the effectiveness of statin therapy  
52  
53 235 for ischaemic stroke patients without dyslipidaemia has not been clearly demonstrated  
54  
55  
56  
57  
58  
59  
60

1  
2  
3  
4  
5  
6 236 in Japan.[29] One of these trained pharmacists (KS, ST, or MK) will treat the

7  
8  
9 237 participants from admission to discharge at the following three stages.

10  
11  
12 238

13  
14  
15  
16 239 *Intervention at admission*

17  
18  
19 240 A comprehensive list of current medications will be compiled within 72 hours after

20  
21  
22 241 admission. A drug review will be performed, and advice regarding the following factors

23  
24  
25 242 will be provided to one of five orthopaedic physicians who care for patients: (1)

26  
27  
28 243 deprescribing inappropriate or unnecessary medications, (2) starting effective or

29  
30  
31 244 necessary medications, and (3) modifying medication dosages. However, the final

32  
33  
34 245 decision to adhere to the advice provided by pharmacists will be determined by the

35  
36  
37 246 orthopaedic physician in charge. Pharmacists will document whether the orthopaedic

38  
39  
40 247 physicians follow their advice. If the orthopaedic physicians accept the advice but defer

41  
42  
43 248 action to the primary care physicians, pharmacists will send the discharge summary

44  
45 249 including their advice to the primary care physicians.

46  
47  
48 250

49  
50  
51  
52 251 *Intervention during hospitalisation*

1  
2  
3  
4  
5  
6 252 During the hospital stay, patients will be educated about the harms and benefits of their  
7  
8  
9 253 medications. Pharmacists will also provide information about the rationale for  
10  
11 254 medication use and therapeutic goals. Patients will be monitored after starting or  
12  
13  
14 255 stopping medications.  
15  
16  
17  
18 256

21 257 *Intervention at discharge*

25 258 Information about discharge medications (e.g., rationale for changes and monitoring  
26  
27  
28 259 needs for newly started or stopped medications) will be summarised in a written  
29  
30  
31 260 document by the pharmacists. Patients will receive discharge counselling with this  
32  
33  
34 261 summary. The summary will also be sent to the primary care physicians and community  
35  
36  
37 262 pharmacists.  
38  
39  
40 263

43 264 **Usual care group**

46  
47 265 Usual care typically includes the same elements as those received by the intervention  
48  
49  
50 266 group but is less extensive. In the usual care group, a comprehensive list of current  
51  
52  
53 267 medications will be compiled by the pharmacists (KS, ST, or MK) within 72 hours after  
54  
55  
56  
57  
58  
59  
60

1  
2  
3  
4  
5  
6 268 admission. Patients will be monitored and educated about newly started medications by  
7  
8  
9 269 their physician and will receive discharge counselling. However, unlike in the  
10  
11 270 intervention group, advice from pharmacists about deprescribing and starting  
12  
13  
14 271 medications will not be provided to the patient's physician, except in cases of apparent  
15  
16  
17 272 harmful effects of medications that are judged to be symptomatic by pharmacists.  
18  
19  
20 273 Furthermore, pharmacists will neither prepare the summary about discharge medications  
21  
22  
23 274 nor send it to the primary care physicians and community pharmacists. However, at the  
24  
25  
26 275 discretion of the pharmacist providing advice about medications for the physicians, the  
27  
28  
29 276 summary about discharge medications will be prepared. These procedures are the  
30  
31 277 standard practice for pharmacists in most Japanese hospitals.[30]  
32  
33  
34  
35  
36  
37  
38  
39  
40  
41  
42  
43  
44  
45  
46  
47  
48  
49  
50  
51  
52  
53  
54  
55  
56  
57  
58  
59  
60

278

### 279 **Data collection**

280 One of the pharmacists (ST, KS, or MK) will collect the demographic and baseline  
281 medical information from the patients and/or their caregivers at admission and  
282 summarise this information on a patient registration form. Participants will be followed  
283 and assessed for two years after study entry (Table 1). One of the pharmacists (ST, KS,  
284 or MK) will assess outcomes at discharge. We will survey the participants or their

1  
2  
3  
4  
5  
6 285 caregivers regarding information about primary and secondary outcomes by sending  
7  
8  
9 286 letters at 6 months, 12 months, and 24 months after randomisation. If the participants do  
10  
11 287 not respond to the survey appropriately, we will contact them or their caregivers by  
12  
13  
14 288 telephone to minimise the effect of missing data on study outcomes. Furthermore, to  
15  
16  
17 289 collect more accurate data, we will also use data from electronic medical records of our  
18  
19  
20 290 hospital if the participants are admitted or visit our hospital regularly during the study  
21  
22  
23 291 period.  
24  
25  
26  
27  
28  
29

## 30 293 **Outcomes**

### 31 32 33 294 *Primary outcome*

34  
35  
36  
37 295 The primary outcome is the readmission rate within one year after randomisation. The  
38  
39  
40 296 readmission rate is defined as the proportion of participants who are readmitted.  
41  
42  
43 297 Readmission includes both planned and unplanned admissions. We will evaluate the  
44  
45  
46 298 difference in the readmission rate within one year after randomisation between the two  
47  
48  
49 299 treatment groups.  
50  
51

52 300  
53  
54  
55  
56  
57  
58  
59  
60

1  
2  
3  
4  
5  
6 301 *Secondary outcomes*  
7  
8

9 302 The secondary outcomes are readmission rates within 6 and 24 months after  
10  
11 303 randomisation. We will evaluate the differences in the readmission rates at 6 and 24  
12  
13 304 months between the two treatment groups. The other secondary outcomes are provided  
14  
15 305 below. These outcomes will be evaluated at discharge and at 6 months, 12 months and  
16  
17 306 24 months after randomisation. We will evaluate the differences between the two  
18  
19 307 treatment groups regarding these outcomes at discharge, 6 months, 12 months and 24  
20  
21 308 months.  
22  
23  
24  
25  
26  
27  
28  
29

30 309 • Any-cause death  
31

32  
33 310 • Total number of medications  
34  
35

36  
37 311 • Potentially inappropriate prescribing based on the 2015 STOPP criteria[8]  
38  
39

40 312 • Potential prescribing omission based on the 2015 START criteria[8]  
41  
42  
43

44 313 • Any fractures  
45  
46

47 314 • Ischaemic stroke  
48  
49

50 315 • Myocardial infarction  
51  
52

53 316 • Emergency department visits  
54  
55  
56  
57  
58  
59  
60

1  
2  
3  
4  
5  
6 317

7  
8 318 **Statistical analysis**

9  
10  
11 319 *Sample size calculation*

12  
13  
14 320 We estimated that a sample of 200 patients would provide the study with a power of at  
15  
16  
17 321 least 80% to show a relative risk reduction of 33% for the primary outcome in the  
18  
19  
20 322 intervention group compared with the usual care group (at a two-sided alpha level of  
21  
22  
23 323 0.05), assuming that the proportion of patients who are readmitted within one year is  
24  
25  
26 324 60% in the usual care group (based on a previous study[23]). Assuming that the dropout  
27  
28  
29 325 rate is 10%, we would need to enrol approximately 220 patients.

30  
31 326

32  
33  
34 327 *Statistical analysis*

35  
36  
37 328 The baseline characteristics of the study population will be summarised using  
38  
39  
40 329 descriptive statistics. The intervention group will be compared against the usual group  
41  
42  
43 330 for all primary and secondary outcomes (Table 2). We will use a chi-squared test for  
44  
45  
46 331 binary outcomes and Student's t-test for continuous outcomes. We will calculate the  
47  
48  
49 332 relative risk and number needed to treat with corresponding 95% confidence intervals to  
50  
51  
52 333 compare dichotomous variables, and the difference in the means will be used for an

1  
2  
3  
4  
5  
6 334 additional analysis of continuous variables. For all tests, we will use 2-sided p-values  
7  
8  
9 335 with an alpha < 0.05 for the level of significance.

10  
11 336 Analyses for all outcomes will include all patients who have undergone  
12  
13  
14 337 randomisation and have provided valid informed consent (intention-to-treat population).  
15  
16  
17 338 Regarding the procedure for missing data, we will exclude the data from participants  
18  
19  
20 339 who are lost to follow-up or whose outcomes are missing. These analyses will be  
21  
22  
23 340 performed using IBM SPSS Statistics Base version 21.0 (IBM Corporation, Nihonbashi,  
24  
25  
26 341 Tokyo, Japan) or Excel statistical software package version 2.11 (Bellcurve for Excel;  
27  
28  
29 342 Social Survey Research Information Co., Ltd., Tokyo, Japan). All analyses will be  
30  
31 343 conducted by investigators who are blinded to the study group allocations.  
32  
33

34  
35  
36  
37 344

#### 37 345 **Data management**

38  
39  
40 346 The trial data of the study participants will be transmitted to and stored in the research  
41  
42  
43 347 database at National Hospital Organization Tochigi Medical Center. This data will not  
44  
45  
46 348 include the participants' identifying information. Instead, individual participants and  
47  
48  
49 349 research data will be identified by unique study identification numbers. At the end of  
50  
51  
52 350 the study, the data will be locked. The data will be stored for at least five years after  
53  
54  
55 351 study completion. Access to the stored data will be limited to investigators. The data  
56  
57  
58  
59  
60



1  
2  
3  
4  
5  
6 352 will be stored using codes assigned by the investigators and kept on password-protected  
7  
8  
9 353 computers.

10  
11  
12 354

13  
14  
15 355 **Monitoring**

16  
17  
18 356 *Data monitoring*

19  
20  
21 357 The risk associated with participation in this study is low, because our aim is to improve  
22  
23  
24 358 the quality of medications in patients. According to the Japanese Ethical Guidelines for  
25  
26  
27 359 Medical and Health Research Involving Human Subjects (as of March 2015), our  
28  
29  
30 360 intervention corresponds with a non-invasive procedure. Therefore, we will not need a  
31  
32  
33 361 data monitoring committee. However, an independent staff pharmacist who is not  
34  
35  
36 362 involved with the trial intervention will monitor the data periodically to ensure safety.

37  
38  
39 363

40  
41  
42  
43 364 *Adverse events*

44  
45  
46 365 In our study, an adverse event will be defined as any undesirable medical occurrence in  
47  
48  
49 366 a participant without regard to the possibility of a causal relationship. Data on adverse  
50  
51  
52 367 events will be collected after the participants have provided consent and enrolled in the  
53  
54  
55 368 study. If a participant experiences an adverse event after the informed consent document

1  
2  
3  
4  
5  
6 369 is signed and the participant has not yet started to receive the study intervention, the  
7  
8  
9 370 event will be reported as not being related to the study intervention. All adverse events  
10  
11 371 that occur after entry into the study and for two years after randomisation will be  
12  
13  
14 372 recorded. A serious adverse event for this study is any undesirable medical occurrence  
15  
16  
17 373 that is believed by the investigators to be causally related to the study intervention and  
18  
19  
20 374 results in any of the following: a life-threatening condition (that is, immediate risk of  
21  
22  
23 375 death) or severe or permanent disability.  
24  
25  
26  
27  
28  
29

### 30 377 *Auditing*

31  
32  
33 378 According to the Japanese Ethical Guidelines for Medical and Health Research  
34  
35  
36 379 Involving Human Subjects (as of March 2015), our intervention corresponds with a  
37  
38  
39 380 non-invasive procedure. Furthermore, past studies investigating the effectiveness of a  
40  
41  
42 381 pharmacist intervention have reported few adverse events.[16-23] Therefore, we will  
43  
44  
45 382 not need auditing.  
46  
47  
48  
49  
50

### 51 384 **Ethics and dissemination**

52  
53  
54  
55  
56  
57  
58  
59  
60

1  
2  
3  
4  
5  
6 385 This study protocol was approved by the Medical Ethics Committee of the National  
7  
8 386 Hospital Organization Tochigi Medical Center (Tochigi, Japan). They judged the study  
9  
10  
11 387 design, ethics, and safety. Substantial amendments to the study protocol must be  
12  
13  
14 388 approved by the Medical Ethics Committee of the National Hospital Organization  
15  
16  
17 389 Tochigi Medical Center. The trial was registered at the UMIN clinical registry on  
18  
19  
20 390 October 3, 2017. We will obtain informed consent from the trial participants or their  
21  
22  
23 391 authorised surrogates according to the Japanese Ethical Guidelines for Medical and  
24  
25  
26 392 Health Research Involving Human Subjects (as of March 2015). One of three  
27  
28  
29 393 pharmacists (ST, KS, or MK) will introduce the trial to patients and discuss the trial  
30  
31  
32 394 with all patients using the information sheets about the nature, purpose, and possible  
33  
34  
35 395 risks and benefits of the trial, which was approved by the Medical Ethics Committee of  
36  
37  
38 396 the National Hospital Organization Tochigi Medical Center. Then, the pharmacists will  
39  
40  
41 397 obtain written informed consent from patients willing to participate in the trial. To  
42  
43  
44 398 assure confidentiality, trial participants will be allocated a unique trial identification  
45  
46  
47 399 number throughout the trial. A manuscript with the results of this study will be  
48  
49  
50 400 published in a peer-reviewed journal.

51 401

52  
53  
54 402 **Patient involvement**

1  
2  
3  
4  
5  
6 403 No patients were involved in determining the research question or outcome measures  
7  
8  
9 404 nor were they involved in developing plans to design or implement the study. No  
10  
11 405 patients were involved in evaluating the burden of the intervention. There are no plans  
12  
13  
14 406 to disseminate the results of this research to study participants or the relevant patient  
15  
16  
17 407 community.  
18  
19  
20 408

## 22 409 **DISCUSSION**

25 410 Given that polypharmacy and potentially inappropriate prescribing among  
26  
27  
28 411 elderly patients is common in acute care settings,[10] it is important to improve the  
29  
30  
31 412 appropriateness of medications during hospitalisation. Therefore, the role of hospital  
32  
33  
34 413 pharmacists in improving polypharmacy and potentially inappropriate prescribing in  
35  
36  
37 414 hospitalised elderly patients is important. Nonetheless, there are conflicting results  
38  
39  
40 415 regarding the effectiveness with which pharmacist interventions in elderly inpatient care  
41  
42  
43 416 can improve polypharmacy and potentially inappropriate prescribing to affect  
44  
45  
46 417 patient-relevant outcomes.[17-21] Given that few past randomised controlled trials have  
47  
48  
49 418 evaluated a patient-relevant outcome as a primary endpoint,[22,23] it is important to  
50  
51 419 conduct a randomised controlled trial to evaluate whether a pharmacist-led intervention  
52  
53  
54  
55  
56  
57  
58  
59  
60

1  
2  
3  
4  
5  
6 420 improves patient-relevant outcomes, such as readmission and death, in hospitalised  
7  
8 421 elderly orthopaedic patients with polypharmacy or potentially inappropriate prescribing.  
9

10  
11  
12 422 There are several limitations to this study. First, the non-blinded study design  
13  
14  
15 423 may overestimate the effectiveness of pharmacist intervention.[31] However, due to the  
16  
17 424 nature of the intervention, it is difficult for both participants and clinical pharmacists to  
18  
19 425 be blinded to the allocation. Second, this study is a single-centre trial. Although most  
20  
21 426 past randomised controlled trials were also single-centre trials,[21,23,32-35] the  
22  
23 427 external validity of this study is limited. Therefore, an additional randomised controlled  
24  
25  
26 428 trial may be needed. Third, we will exclude elderly orthopaedic patients who are  
27  
28  
29 429 admitted electively or who are taking less than five prescribed medications or have no  
30  
31  
32 430 potentially inappropriate prescriptions. Furthermore, elderly patients admitted to other  
33  
34  
35 431 specialty wards, such as internal medicine or general surgery, will also be excluded.  
36  
37  
38 432 Therefore, it is unclear whether the findings of this trial will be applicable to elderly  
39  
40  
41 433 patients who are admitted electively or to other wards besides the orthopaedic ward.  
42  
43  
44 434 Fourth, medication reconciliation is included in the usual care group in this study. The  
45  
46  
47 435 possible beneficial effect of medical reconciliation for hospitalised patients[36] may  
48  
49  
50 436 mitigate the effectiveness of the pharmacist intervention in this study. Finally, we will  
51  
52  
53 437 not assess the cost-effectiveness of the intervention.  
54  
55  
56  
57  
58  
59  
60

1  
2  
3  
4  
5  
6 438 Although these limitations are important, this study is one of a few randomised  
7  
8  
9 439 controlled trials to investigate the effectiveness of a pharmacist-led intervention and use  
10  
11 440 a patient-relevant outcome as the primary outcome for hospitalised elderly patients.

12  
13  
14 441 Given that the burdens of polypharmacy and multi-morbidities among elderly patients  
15  
16  
17 442 have increased in recent years, this trial will provide important information on  
18  
19  
20 443 improving the acute care of elderly patients with polypharmacy or potentially  
21  
22  
23 444 inappropriate prescribing.

24  
25  
26 445

27  
28 446 **Acknowledgements:** None.

29  
30  
31 447

32  
33  
34 448 **Contributors:** KS and JK conceived the project. JK performed the literature search and  
35  
36  
37 449 review. KS, JK, ST, and MK designed the study. KS and JK wrote the draft of the  
38  
39  
40 450 protocol for the study. All authors contributed equally to writing the original protocol  
41  
42  
43 451 for this study. KS is the chief investigator of this study. JK wrote the draft of this  
44  
45  
46 452 manuscript. All authors provided final approval for submission of this manuscript for  
47  
48  
49 453 publication consideration.

50  
51 454

1  
2  
3  
4  
5  
6 455 **Competing interests:** All authors have completed the ICMJE unified disclosure from  
7  
8  
9 456 competing interest form at [www.icmje.org/coi\\_disclosure.pdf](http://www.icmje.org/coi_disclosure.pdf) (available upon request  
10  
11 457 from the corresponding author). All authors declare that they have no conflicts of  
12  
13  
14 458 interest.

15  
16  
17 459  
18  
19  
20 460 **Funding:** This study is investigator initiated and self-funded. It is not supported by a  
21  
22 461 specific grant from any funding agency in the public, commercial, or not-for-profit  
23  
24  
25 462 sector.

26  
27  
28 463  
29  
30  
31 464 **Ethical approval:** This study was approved by the Medical Ethics Committee of the  
32  
33 465 National Hospital Organization Tochigi Medical Center (No. 29-22).

34  
35  
36  
37 466  
38  
39 467 **REFERENCES**

- 40  
41  
42 468 1 Wolff JL, Starfield B, Anderson G. Prevalence, expenditures, and complications of  
43  
44  
45 469 multiple chronic conditions in the elderly. *Arch Intern Med* 2002;162:2269-76.  
46  
47  
48 470 doi:10.1001/archinte.162.20.2269.
- 49  
50  
51 471 2 Kaufman DW, Kelly JP, Rosenberg L et al. Recent patterns of medication use in the  
52  
53  
54 472 ambulatory adult population of the United States: The Slone survey. *JAMA*

- 1  
2  
3  
4  
5  
6 473 2002;287:337-44. doi:10.1001/jama.287.3.337.  
7  
8  
9 474 3 Boyd CM, Dare J, Boulton C, et al. Clinical practice guidelines and quality of care for  
10  
11 475 older patients with multiple comorbid diseases. *JAMA* 2005;294:716-24.  
12  
13  
14 476 doi:10.1001/jama.294.6.716.  
15  
16  
17 477 4 Steinman MA, Landefeld CS, Rosenthal GE, et al. Polypharmacy and prescribing  
18  
19  
20 478 quality in older people. *J Am Geriatr Soc* 2006;54:1516-23.  
21  
22  
23 479 doi:10.1111/j.1532-5415.2006.00889.x.  
24  
25  
26 480 5 Fried TR, O'Leary J, Towle V, et al. Health outcomes associated with polypharmacy  
27  
28 481 in community-dwelling older adults: a systematic review. *J Am Geriatr Soc*  
29  
30  
31 482 2014;62:2261-72. doi:10.1111/jgs.13153.  
32  
33  
34 483 6 Beijer HJ, de Blaeij CJ. Hospitalisations caused by adverse drug reactions (ADR): a  
35  
36  
37 484 meta-analysis of observational studies. *Pharm World Sci* 2002;24:46-54.  
38  
39  
40 485 doi:10.1023/A:1015570104121.  
41  
42  
43 486 7 The American Geriatrics Society 2015 Beers Criteria Update Expert Panel.  
44  
45 487 American Geriatrics Society 2015 updated Beers Criteria for potentially  
46  
47  
48 488 inappropriate medication use in older adults. *J Am Geriatr Soc* 2015;63:2227-46.  
49  
50  
51 489 doi:10.1111/jgs.13702.  
52  
53  
54 490 8 O'Mahony D, O'Sullivan D, Byrne S, et al. STOPP/START criteria for potentially  
55  
56  
57  
58  
59  
60



- 1  
2  
3  
4  
5  
6 491 inappropriate prescribing in older people: version 2. *Age Ageing* 2015;44:213-8.  
7  
8  
9 492 doi:10.1093/ageing/aful145.  
10  
11 493 9 Scott IA, Hilmer SN, Reeve E, et al. Reducing inappropriate polypharmacy: the  
12  
13  
14 494 process of deprescribing. *JAMA Intern Med* 2015;175(5):827-34.  
15  
16  
17 495 doi:10.1001/jamainternmed.2015.0324.  
18  
19  
20 496 10 Gallagher P, Lang PO, Cherubini A, et al. Prevalence of potentially inappropriate  
21  
22  
23 497 prescribing in an acutely ill population of older patients admitted to six European  
24  
25  
26 498 hospitals. *Eur J Clin Pharmacol* 2011;67:1175-88. doi:10.1007/s00228-011-1061-0.  
27  
28  
29 499 11 Tommelein E, Mehuys E, Petrovic M, et al. Potentially inappropriate prescribing in  
30  
31 500 community-dwelling older people across Europe: a systematic literature review. *Eur*  
32  
33  
34 501 *J Clin Pharmacol* 2015;71(12):1415-27. doi:10.1007/s00228-015-1954-4.  
35  
36  
37 502 12 Opondo D, Eslami S, Visscher S, et al. Inappropriateness of medication prescriptions  
38  
39  
40 503 to elderly patients in the primary care setting: a systematic review. *PLoS ONE*  
41  
42  
43 504 2012;7(8):e43617. doi:10.1371/journal.pone.0043617.  
44  
45  
46 505 13 The American College of Emergency Physicians, the American Geriatrics Society,  
47  
48  
49 506 Emergency Nurses Association and the Society for Academic Emergency Medicine.  
50  
51  
52 507 Geriatric emergency department guidelines. *Ann Emerg Med* 2014;63:e7-e25. doi:  
53  
54  
55 508 10.1016/j.annemergmed.2014.02.008.  
56  
57  
58  
59  
60

- 1  
2  
3  
4  
5  
6 509 14 Hohl CM, Zed PJ, Brubacher JR, et al. Do emergency physicians attribute  
7  
8 510 drug-related emergency department visits to medication-related problems? *Ann*  
9  
10  
11 511 *Emerg Med* 2010;55:493-502. doi:10.1016/j.annemergmed.2009.10.008.  
12  
13  
14 512 15 Gandhi TK, Weingart SN, Borus J, et al. Adverse drug events in ambulatory care.  
15  
16 513 *New Engl J Med* 2003;348:1556-64. doi:10.1056/NEJMsa020703  
17  
18  
19  
20 514 16 Walsh KA, O’Riordan D, Kearney PM, et al. Improving the appropriateness of  
21  
22 515 prescribing in older patients: a systematic review and meta-analysis of pharmacists’  
23  
24 516 interventions in secondary care. *Age Ageing* 2016;45:201-9.  
25  
26 517 doi:10.1093/ageing/afv190.  
27  
28  
29  
30  
31 518 17 Kaboli PJ, Hoth AB, McClimon BJ, et al. Clinical pharmacists and inpatient  
32  
33 519 medical care: a systematic review. *Arch Intern Med* 2006;166:955-64.  
34  
35 520 doi:10.1001/archinte.166.9.955.  
36  
37  
38  
39  
40 521 18 Holland R, Desborough J, Goodyer L, et al. Does pharmacist-led medication review  
41  
42 522 help to reduce hospital admissions and deaths in older people? A systematic review  
43  
44 523 and meta-analysis. *Br J Clin Pharmacol* 2007;65(3):303-16.  
45  
46 524 doi:10.1111/j.1365-2125.2007.03071.x.  
47  
48  
49  
50  
51  
52  
53  
54  
55  
56  
57  
58  
59  
60

- 1  
2  
3  
4  
5  
6 525 19 Koshman SL, Charrois TL, Simpson SH, et al. Pharmacist care of patients with heart  
7  
8 failure: a systematic review of randomized trials. *Arch Intern Med*  
9 526  
10  
11 527 2008;168(7):687-94. doi:10.1001/archinte.168.7.687.  
12  
13  
14 528 20 Renaudin P, Boyer L, Esteve MA, et al. Do pharmacist-led medication reviews in  
15  
16 hospitals help reduce hospital readmissions? A systematic review and meta-analysis.  
17 529  
18  
19 530 *Br J Clin Pharm* 2016;82:1660-73. doi:10.1111/bcp.13085.  
20  
21  
22 531 21 Thomas R, Huntley AL, Mann M, et al. Pharmacist-led interventions to reduce  
23  
24 unplanned admissions for older people: a systematic review and meta-analysis of  
25 532  
26  
27 randomised controlled trials. *Age Ageing* 2014;43:174-87.  
28 533  
29  
30 534 doi:10.1093/ageing/aft169.  
31  
32  
33 535 22 Nazareth I, Burton A, Shulman S, et al. A pharmacy discharge plan for hospitalized  
34  
35 elderly patients: a randomized controlled trial. *Age Ageing* 2001;30:33-40.  
36 536  
37  
38 537 doi:10.1093/ageing/30.1.33.  
39  
40  
41 538 23 Gillespie U, Alassaad A, Henrohn D, et al. A comprehensive pharmacist  
42  
43 intervention to reduce morbidity in patients 80 years or older: a randomized  
44 539  
45  
46 controlled trial. *Arch Intern Med* 2009;169(9):894-900.  
47 540  
48  
49 541 doi:10.1001/archinternmed.2009.71.  
50  
51  
52  
53  
54  
55  
56  
57  
58  
59  
60

- 1  
2  
3  
4  
5  
6 542 24 McMahon CG, Cahir CA, Kenny RA, et al. Inappropriate prescribing in older fallers  
7  
8  
9 543 presenting to an Irish emergency department. *Age Ageing* 2014;43:44-50.  
10  
11 544 doi:10.1093/ageing/aft114.  
12  
13  
14 545 25 Kragh A, Elmståhl S, Atroshi I. Older adults' medication use 6 months before and  
15  
16  
17 546 after hip fracture: A population-based cohort study. *J Am Geriatr Soc* 2011;59:863-8.  
18  
19  
20 547 doi:10.1111/j.1532-5415.2011.03372.x.  
21  
22  
23 548 26 Lai SW, Liao KF, Liao CC, et al. Polypharmacy correlates with increased risk for hip  
24  
25  
26 549 fracture in the elderly. A population-based study. *Medicine* 2010;89:295-9.  
27  
28  
29 550 doi:10.1097/MD.0b013e3181f15efc.  
30  
31 551 27 Chan AW, Tetzlaff JM, Gøtzsche PC, et al. SPIRIT 2013 explanation and  
32  
33  
34 552 elaboration: guidance for protocols of clinical trials. *BMJ* 2013;346:e7586.  
35  
36  
37 553 doi:10.1136/bmj.e7586.  
38  
39  
40 554 28 Gnjdjic D, Hilmer SN, Blyth FM, et al. Polypharmacy cutoff and outcomes: five or  
41  
42  
43 555 more medicines were used to identify community-dwelling older men at risk of  
44  
45  
46 556 different adverse outcomes. *J Clin Epidemiol* 2012;65:989-95.  
47  
48  
49 557 doi:10.1016/j.jclinepi.2012.02.018.  
50  
51  
52  
53  
54  
55  
56  
57  
58  
59  
60

- 1  
2  
3  
4  
5  
6 558 29 Hosomi N, Nagai Y, Kohriyama T, et al. The Japan Statin Treatment Against  
7  
8  
9 559 Recurrent Stroke (J-STARS): a multicenter, randomized, open-label, parallel-group  
10  
11 560 study. *EBioMedicine* 2015;2(9):1071-8. doi:10.1016/j.ebiom.2015.08.006.  
12  
13  
14 561 30 Nakagawa S, Kume N. Pharmacy practice in Japan. *Can J Hosp Pharm*  
15  
16  
17 562 2017;70(3):232-42. doi:10.4212/cjhp.v70i3.1663.  
18  
19  
20 563 31 Wood L, Egger M, Gluud LL, et al. Empirical evidence of bias in treatment effect  
21  
22 564 estimates in controlled trials with different interventions and outcomes:  
23  
24  
25 565 meta-epidemiological study. *BMJ* 2008;336(7644):601-5.  
26  
27  
28 566 doi:10.1136/bmj.39465.451748.AD.  
29  
30  
31 567 32 Lisby M, Thomsen A, Nielsen LP, et al. The effect of systematic review in elderly  
32  
33  
34 568 patients admitted to an acute ward of internal medicine. *Basic Clin Pharmacol*  
35  
36  
37 569 *Toxicol* 2010;106(5):422-7. doi:10.1111/j.1742-7843.2009.00511.x.  
38  
39  
40 570 33 McMullin ST, Hennenfent JA, Ritchie DJ, et al. A prospective, randomized trial to  
41  
42 571 assess the cost impact of pharmacist-initiated interventions. *Arch Intern Med*  
43  
44  
45 572 1999;159(19):2306-9. doi:10.1001/archinte.159.19.2306.  
46  
47  
48 573 34 Spinewine A, Swine C, Dhillon S, et al. Effect of a collaborative approach on the  
49  
50  
51 574 quality of prescribing for geriatric inpatients: a randomized, controlled trial. *J Am*  
52  
53  
54 575 *Geriatr Soc* 2007;55(5):658-65. doi:10.1111/j.1532-5415.2007.01132.x.  
55  
56  
57  
58  
59  
60

- 1  
2  
3  
4  
5  
6 576 35 Lipton HL, Bird JA. The impact of clinical pharmacists' consultations on geriatric  
7  
8  
9 577 patients' compliance and medical care use: a randomized controlled trial.  
10  
11 578 *Gerontologist* 1994;34(3):307-15. doi:10.1093/geront/34.3.307.  
12  
13  
14 579 36 Mekonnen AB, McLachlan AJ, Brien JE. Effectiveness of pharmacist-led  
15  
16  
17 580 medication reconciliation programmes on clinical outcomes at hospital transitions:  
18  
19  
20 581 a systematic review and meta-analysis. *BMJ Open* 2016;6:e010003.  
21  
22  
23 582 doi:10.1136/bmjopen-2015-010003.  
24  
25  
26 583

584 **Table 1.** Time schedule of participant enrolment, interventions, and assessments.

|                            | STUDY PERIOD |                                                                                     |                 |       |       |       |
|----------------------------|--------------|-------------------------------------------------------------------------------------|-----------------|-------|-------|-------|
|                            | Enrolment    | Allocation                                                                          | Post-allocation |       |       |       |
| TIMEPOINT*                 | $-t_1$       | 0                                                                                   | $t_1$           | $t_2$ | $t_3$ | $t_4$ |
| <b>ENROLMENT:</b>          |              |                                                                                     |                 |       |       |       |
| Eligibility screen         | X            |                                                                                     |                 |       |       |       |
| Informed consent           | X            |                                                                                     |                 |       |       |       |
| Allocation                 |              | X                                                                                   |                 |       |       |       |
| <b>INTERVENTIONS:</b>      |              |                                                                                     |                 |       |       |       |
| Pharmacist intervention    |              | 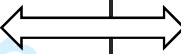   |                 |       |       |       |
| Usual care (control)       |              |  |                 |       |       |       |
| <b>ASSESSMENTS:</b>        |              |                                                                                     |                 |       |       |       |
| Number of medications      | X            |                                                                                     | X               | X     | X     | X     |
| Number of PIP <sup>†</sup> | X            |                                                                                     | X               | X     | X     | X     |
| Number of PPO <sup>†</sup> | X            |                                                                                     | X               | X     | X     | X     |
| Adverse drug events        |              |                                                                                     | X               |       |       |       |
| Discharge destination      |              |                                                                                     | X               |       |       |       |
| Duration of hospital stay  |              |                                                                                     | X               |       |       |       |
| All-cause death            |              |                                                                                     | X               | X     | X     | X     |
| Readmission                |              |                                                                                     |                 | X     | X     | X     |
| ED visit                   |              |                                                                                     |                 | X     | X     | X     |

|                              |  |  |   |   |   |   |
|------------------------------|--|--|---|---|---|---|
| <b>Myocardial infarction</b> |  |  | X | X | X | X |
| <b>Ischaemic stroke</b>      |  |  | X | X | X | X |
| <b>Fracture</b>              |  |  | X | X | X | X |

585 \* $t_1$ , within 72 hours after admission;  $t_1$ , at discharge;  $t_2$ , six months after randomisation;

586  $t_3$ , 12 months after randomisation;  $t_4$ , 24 months after randomisation.

587 †PIP and PPO are defined based on the 2015 STOPP/START Criteria.

588 ED, emergency department; PIP, potentially inappropriate prescribing; PPO, potential

589 prescribing omission.

590



591 **Table 2.** Variables, measures, and analysis methods.

| Variable/outcome                                               | Hypothesis           | Measured outcomes                                                           | Methods of analysis |
|----------------------------------------------------------------|----------------------|-----------------------------------------------------------------------------|---------------------|
| Primary                                                        |                      |                                                                             |                     |
| Readmission* at 12 months                                      | Improvement occurred | Readmission rate % [binary]                                                 | Chi-squared test    |
| Secondary                                                      |                      |                                                                             |                     |
| Number of medications at discharge and at 6, 12, and 24 months | Decline occurred     | Total number of medications [continuous]                                    | T-test              |
| PIP <sup>†</sup> at discharge and at 6, 12, and 24 months      | Decline occurred     | Total number of PIP [continuous]                                            | T-test              |
|                                                                | Improvement occurred | Proportion of patients who take any PIP % [binary]                          | Chi-squared test    |
| PPO <sup>†</sup> at discharge and at 6, 12, and 24 months      | Decline occurred     | Total number of PPO [continuous]                                            | T-test              |
|                                                                | Improvement occurred | Proportion of patients who take any PPO % [binary]                          | Chi-squared test    |
| Readmission* at 6 and 24 months                                | Improvement occurred | Readmission rate % [binary]                                                 | Chi-squared test    |
| ED visit at 6, 12, and 24 months                               | Improvement occurred | Proportion of patients who visit ED % [binary]                              | Chi-squared test    |
| All-cause death at 6, 12, and 24 months                        | Improvement occurred | All-cause mortality % [binary]                                              | Chi-squared test    |
| Acute myocardial infarction at 6, 12, and 24 months            | Improvement occurred | Proportion of patients whom acute myocardial infarction occurred % [binary] | Chi-squared test    |
| Acute ischaemic stroke at 6, 12, and 24 months                 | Improvement occurred | Proportion of patients whom acute ischaemic stroke occurred % [binary]      | Chi-squared test    |
| Any fractures at 6, 12, and 24 months                          | Improvement occurred | Proportion of patients whom any fractures occurred % [binary]               | Chi-squared test    |

1  
2  
3  
4  
5 592 \*Includes both planned and unplanned hospitalisation.  
6

7 593 †PIP and PPO are defined based on the 2015 STOPP/START Criteria.  
8

9 594 ED, emergency department; PIP, potentially inappropriate prescribing; PPO, potential  
10 595 prescribing omission.  
11  
12  
13  
14  
15  
16  
17  
18  
19  
20  
21  
22  
23  
24  
25  
26  
27  
28  
29  
30  
31  
32  
33  
34  
35  
36  
37  
38  
39  
40  
41  
42  
43  
44  
45  
46  
47  
48  
49  
50  
51  
52  
53  
54  
55  
56  
57  
58  
59  
60

1  
2  
3  
4  
5  
6  
7  
8  
9  
10  
11  
12  
13  
14  
15  
16  
17  
18  
19  
20  
21  
22  
23  
24  
25  
26  
27  
28  
29  
30  
31  
32  
33  
34  
35  
36  
37  
38  
39  
40  
41  
42  
43  
44  
45  
46  
47  
48  
49  
50  
51  
52  
53  
54  
55  
56  
57  
58  
59  
60

596 **Figure 1.** Flow diagram of the participant.

For peer review only

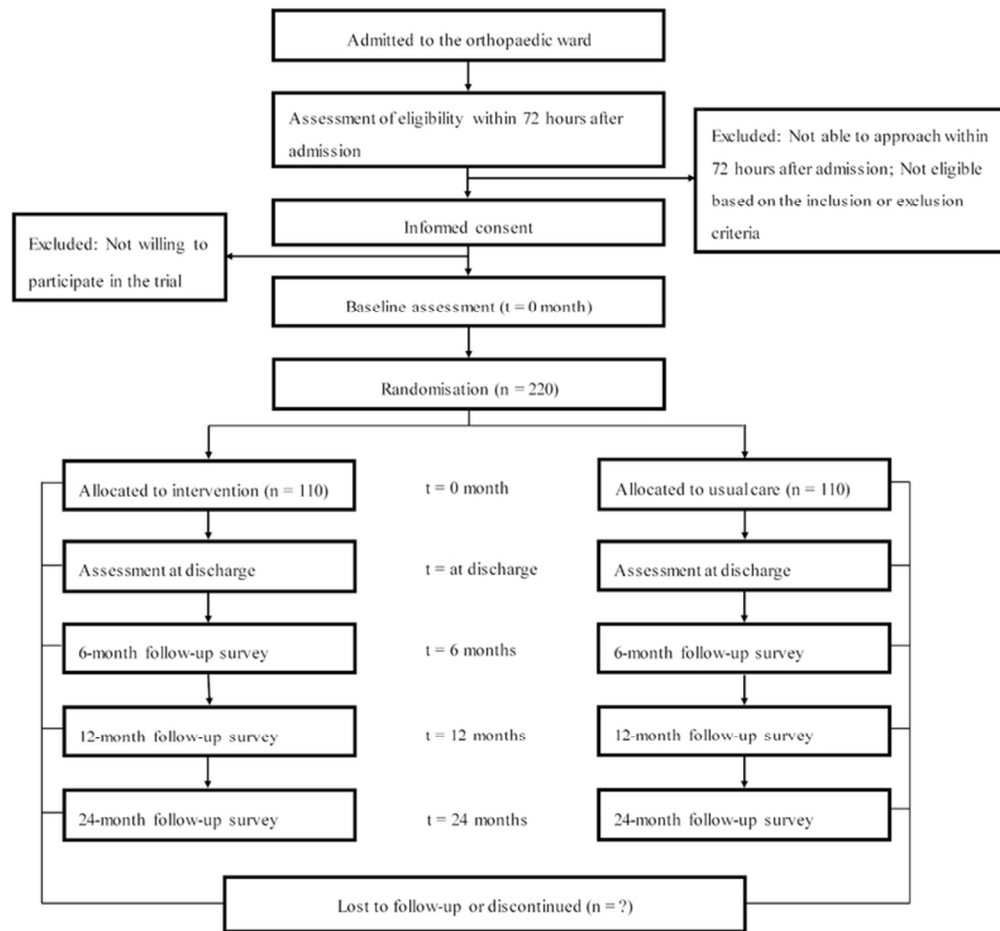

Flow diagram of the participant.

67x64mm (300 x 300 DPI)

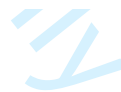

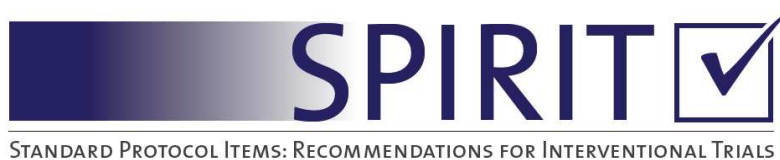

SPIRIT 2013 Checklist: Recommended items to address in a clinical trial protocol and related documents\*

| Section/item                      | Item No | Description                                                                                                                                                                                                                                                                              | Page Number on which item is reported |
|-----------------------------------|---------|------------------------------------------------------------------------------------------------------------------------------------------------------------------------------------------------------------------------------------------------------------------------------------------|---------------------------------------|
| <b>Administrative information</b> |         |                                                                                                                                                                                                                                                                                          |                                       |
| Title                             | 1       | Descriptive title identifying the study design, population, interventions, and, if applicable, trial acronym                                                                                                                                                                             | 1                                     |
| Trial registration                | 2a      | Trial identifier and registry name. If not yet registered, name of intended registry                                                                                                                                                                                                     | 4                                     |
|                                   | 2b      | All items from the World Health Organization Trial Registration Data Set                                                                                                                                                                                                                 | 4                                     |
| Protocol version                  | 3       | Date and version identifier                                                                                                                                                                                                                                                              | NA                                    |
| Funding                           | 4       | Sources and types of financial, material, and other support                                                                                                                                                                                                                              | 29                                    |
| Roles and responsibilities        | 5a      | Names, affiliations, and roles of protocol contributors                                                                                                                                                                                                                                  | 28                                    |
|                                   | 5b      | Name and contact information for the trial sponsor                                                                                                                                                                                                                                       | NA                                    |
|                                   | 5c      | Role of study sponsor and funders, if any, in study design; collection, management, analysis, and interpretation of data; writing of the report; and the decision to submit the report for publication, including whether they will have ultimate authority over any of these activities | NA                                    |
|                                   | 5d      | Composition, roles, and responsibilities of the coordinating centre, steering committee, endpoint adjudication committee, data management team, and other individuals or groups overseeing the trial, if applicable (see Item 21a for data monitoring committee)                         | NA                                    |
| <b>Introduction</b>               |         |                                                                                                                                                                                                                                                                                          |                                       |

|                                                           |     |                                                                                                                                                                                                                                                                                                                                                                                |       |
|-----------------------------------------------------------|-----|--------------------------------------------------------------------------------------------------------------------------------------------------------------------------------------------------------------------------------------------------------------------------------------------------------------------------------------------------------------------------------|-------|
| Background and rationale                                  | 6a  | Description of research question and justification for undertaking the trial, including summary of relevant studies (published and unpublished) examining benefits and harms for each intervention                                                                                                                                                                             | 6-9   |
|                                                           | 6b  | Explanation for choice of comparators                                                                                                                                                                                                                                                                                                                                          | 17    |
| Objectives                                                | 7   | Specific objectives or hypotheses                                                                                                                                                                                                                                                                                                                                              | 8-9   |
| Trial design                                              | 8   | Description of trial design including type of trial (eg, parallel group, crossover, factorial, single group), allocation ratio, and framework (eg, superiority, equivalence, noninferiority, exploratory)                                                                                                                                                                      | 10    |
| <b>Methods: Participants, interventions, and outcomes</b> |     |                                                                                                                                                                                                                                                                                                                                                                                |       |
| Study setting                                             | 9   | Description of study settings (eg, community clinic, academic hospital) and list of countries where data will be collected. Reference to where list of study sites can be obtained                                                                                                                                                                                             | 11    |
| Eligibility criteria                                      | 10  | Inclusion and exclusion criteria for participants. If applicable, eligibility criteria for study centres and individuals who will perform the interventions (eg, surgeons, psychotherapists)                                                                                                                                                                                   | 11-12 |
| Interventions                                             | 11a | Interventions for each group with sufficient detail to allow replication, including how and when they will be administered                                                                                                                                                                                                                                                     | 15-17 |
|                                                           | 11b | Criteria for discontinuing or modifying allocated interventions for a given trial participant (eg, drug dose change in response to harms, participant request, or improving/worsening disease)                                                                                                                                                                                 | 15-17 |
|                                                           | 11c | Strategies to improve adherence to intervention protocols, and any procedures for monitoring adherence (eg, drug tablet return, laboratory tests)                                                                                                                                                                                                                              | NA    |
|                                                           | 11d | Relevant concomitant care and interventions that are permitted or prohibited during the trial                                                                                                                                                                                                                                                                                  | 15-18 |
| Outcomes                                                  | 12  | Primary, secondary, and other outcomes, including the specific measurement variable (eg, systolic blood pressure), analysis metric (eg, change from baseline, final value, time to event), method of aggregation (eg, median, proportion), and time point for each outcome. Explanation of the clinical relevance of chosen efficacy and harm outcomes is strongly recommended | 19-20 |

|                                                                     |     |                                                                                                                                                                                                                                                                                                                                                          |                          |
|---------------------------------------------------------------------|-----|----------------------------------------------------------------------------------------------------------------------------------------------------------------------------------------------------------------------------------------------------------------------------------------------------------------------------------------------------------|--------------------------|
| Participant timeline                                                | 13  | Time schedule of enrolment, interventions (including any run-ins and washouts), assessments, and visits for participants. A schematic diagram is highly recommended (see Figure)                                                                                                                                                                         | 18-19, Figure 1, Table 1 |
| Sample size                                                         | 14  | Estimated number of participants needed to achieve study objectives and how it was determined, including clinical and statistical assumptions supporting any sample size calculations                                                                                                                                                                    | 12, 21                   |
| Recruitment                                                         | 15  | Strategies for achieving adequate participant enrolment to reach target sample size                                                                                                                                                                                                                                                                      | 12-13                    |
| <b>Methods: Assignment of interventions (for controlled trials)</b> |     |                                                                                                                                                                                                                                                                                                                                                          |                          |
| Allocation:                                                         |     |                                                                                                                                                                                                                                                                                                                                                          |                          |
| Sequence generation                                                 | 16a | Method of generating the allocation sequence (eg, computer-generated random numbers), and list of any factors for stratification. To reduce predictability of a random sequence, details of any planned restriction (eg, blocking) should be provided in a separate document that is unavailable to those who enrol participants or assign interventions | 14                       |
| Allocation concealment mechanism                                    | 16b | Mechanism of implementing the allocation sequence (eg, central telephone; sequentially numbered, opaque, sealed envelopes), describing any steps to conceal the sequence until interventions are assigned                                                                                                                                                | 14                       |
| Implementation                                                      | 16c | Who will generate the allocation sequence, who will enrol participants, and who will assign participants to interventions                                                                                                                                                                                                                                | 14                       |
| Blinding (masking)                                                  | 17a | Who will be blinded after assignment to interventions (eg, trial participants, care providers, outcome assessors, data analysts), and how                                                                                                                                                                                                                | 14-15                    |
|                                                                     | 17b | If blinded, circumstances under which unblinding is permissible, and procedure for revealing a participant's allocated intervention during the trial                                                                                                                                                                                                     | NA                       |
| <b>Methods: Data collection, management, and analysis</b>           |     |                                                                                                                                                                                                                                                                                                                                                          |                          |

|                                                                      |                            |     |                                                                                                                                                                                                                                                                                                                                                                                                              |                |
|----------------------------------------------------------------------|----------------------------|-----|--------------------------------------------------------------------------------------------------------------------------------------------------------------------------------------------------------------------------------------------------------------------------------------------------------------------------------------------------------------------------------------------------------------|----------------|
| 1<br>2<br>3<br>4<br>5<br>6<br>7<br>8<br>9<br>10                      | Data collection methods    | 18a | Plans for assessment and collection of outcome, baseline, and other trial data, including any related processes to promote data quality (eg, duplicate measurements, training of assessors) and a description of study instruments (eg, questionnaires, laboratory tests) along with their reliability and validity, if known. Reference to where data collection forms can be found, if not in the protocol | 18-19          |
| 11<br>12<br>13<br>14<br>15<br>16                                     |                            | 18b | Plans to promote participant retention and complete follow-up, including list of any outcome data to be collected for participants who discontinue or deviate from intervention protocols                                                                                                                                                                                                                    | 19             |
| 17<br>18<br>19<br>20<br>21<br>22<br>23<br>24                         | Data management            | 19  | Plans for data entry, coding, security, and storage, including any related processes to promote data quality (eg, double data entry; range checks for data values). Reference to where details of data management procedures can be found, if not in the protocol                                                                                                                                            | 22-23          |
| 25<br>26<br>27<br>28<br>29                                           | Statistical methods        | 20a | Statistical methods for analysing primary and secondary outcomes. Reference to where other details of the statistical analysis plan can be found, if not in the protocol                                                                                                                                                                                                                                     | 21-22, Table 2 |
| 30<br>31<br>32                                                       |                            | 20b | Methods for any additional analyses (eg, subgroup and adjusted analyses)                                                                                                                                                                                                                                                                                                                                     | 21-22, Table 2 |
| 33<br>34<br>35<br>36<br>37<br>38                                     |                            | 20c | Definition of analysis population relating to protocol non-adherence (eg, as randomised analysis), and any statistical methods to handle missing data (eg, multiple imputation)                                                                                                                                                                                                                              | 22             |
| 39                                                                   | <b>Methods: Monitoring</b> |     |                                                                                                                                                                                                                                                                                                                                                                                                              |                |
| 40<br>41<br>42<br>43<br>44<br>45<br>46<br>47<br>48                   | Data monitoring            | 21a | Composition of data monitoring committee (DMC); summary of its role and reporting structure; statement of whether it is independent from the sponsor and competing interests; and reference to where further details about its charter can be found, if not in the protocol. Alternatively, an explanation of why a DMC is not needed                                                                        | 23             |
| 49<br>50<br>51<br>52<br>53<br>54<br>55<br>56<br>57<br>58<br>59<br>60 |                            | 21b | Description of any interim analyses and stopping guidelines, including who will have access to these interim results and make the final decision to terminate the trial                                                                                                                                                                                                                                      | NA             |



|                                 |     |                                                                                                                                                                                                                                                                                     |       |
|---------------------------------|-----|-------------------------------------------------------------------------------------------------------------------------------------------------------------------------------------------------------------------------------------------------------------------------------------|-------|
| Harms                           | 22  | Plans for collecting, assessing, reporting, and managing solicited and spontaneously reported adverse events and other unintended effects of trial interventions or trial conduct                                                                                                   | 23-24 |
| Auditing                        | 23  | Frequency and procedures for auditing trial conduct, if any, and whether the process will be independent from investigators and the sponsor                                                                                                                                         | 24    |
| <b>Ethics and dissemination</b> |     |                                                                                                                                                                                                                                                                                     |       |
| Research ethics approval        | 24  | Plans for seeking research ethics committee/institutional review board (REC/IRB) approval                                                                                                                                                                                           | 25    |
| Protocol amendments             | 25  | Plans for communicating important protocol modifications (eg, changes to eligibility criteria, outcomes, analyses) to relevant parties (eg, investigators, REC/IRBs, trial participants, trial registries, journals, regulators)                                                    | 25    |
| Consent or assent               | 26a | Who will obtain informed consent or assent from potential trial participants or authorised surrogates, and how (see Item 32)                                                                                                                                                        | 25    |
|                                 | 26b | Additional consent provisions for collection and use of participant data and biological specimens in ancillary studies, if applicable                                                                                                                                               | NA    |
| Confidentiality                 | 27  | How personal information about potential and enrolled participants will be collected, shared, and maintained in order to protect confidentiality before, during, and after the trial                                                                                                | 25    |
| Declaration of interests        | 28  | Financial and other competing interests for principal investigators for the overall trial and each study site                                                                                                                                                                       | 29    |
| Access to data                  | 29  | Statement of who will have access to the final trial dataset, and disclosure of contractual agreements that limit such access for investigators                                                                                                                                     | 22    |
| Ancillary and post-trial care   | 30  | Provisions, if any, for ancillary and post-trial care, and for compensation to those who suffer harm from trial participation                                                                                                                                                       | NA    |
| Dissemination policy            | 31a | Plans for investigators and sponsor to communicate trial results to participants, healthcare professionals, the public, and other relevant groups (eg, via publication, reporting in results databases, or other data sharing arrangements), including any publication restrictions | 25    |

|                            |     |                                                                                                                                                                                                |                    |
|----------------------------|-----|------------------------------------------------------------------------------------------------------------------------------------------------------------------------------------------------|--------------------|
|                            | 31b | Authorship eligibility guidelines and any intended use of professional writers                                                                                                                 | NA                 |
|                            | 31c | Plans, if any, for granting public access to the full protocol, participant-level dataset, and statistical code                                                                                | NA                 |
| <b>Appendices</b>          |     |                                                                                                                                                                                                |                    |
| Informed consent materials | 32  | Model consent form and other related documentation given to participants and authorised surrogates                                                                                             | Supplementary file |
| Biological specimens       | 33  | Plans for collection, laboratory evaluation, and storage of biological specimens for genetic or molecular analysis in the current trial and for future use in ancillary studies, if applicable | NA                 |

\*It is strongly recommended that this checklist be read in conjunction with the SPIRIT 2013 Explanation & Elaboration for important clarification on the items. Amendments to the protocol should be tracked and dated. The SPIRIT checklist is copyrighted by the SPIRIT Group under the Creative Commons "[Attribution-NonCommercial-NoDerivs 3.0 Unported](https://creativecommons.org/licenses/by-nc-nd/3.0/)" license.

# BMJ Open

**A study protocol for a single-centre, prospective, non-blinded, randomised, 12-month, parallel-group superiority study to compare the efficacy of pharmacist intervention versus usual care for elderly patients hospitalised in orthopaedic wards**

|                                 |                                                                                                                                                                                                                                                                                                                                                            |
|---------------------------------|------------------------------------------------------------------------------------------------------------------------------------------------------------------------------------------------------------------------------------------------------------------------------------------------------------------------------------------------------------|
| Journal:                        | <i>BMJ Open</i>                                                                                                                                                                                                                                                                                                                                            |
| Manuscript ID                   | bmjopen-2018-021924.R2                                                                                                                                                                                                                                                                                                                                     |
| Article Type:                   | Protocol                                                                                                                                                                                                                                                                                                                                                   |
| Date Submitted by the Author:   | 08-May-2018                                                                                                                                                                                                                                                                                                                                                |
| Complete List of Authors:       | Komagamine, Junpei; National Hospital Organization Tochigi Medical Center, Internal Medicine<br>Sugawara, Kenichi; National Hospital Organization Tochigi Medical Center, Pharmacy<br>Kaminaga, Miho; National Hospital Organization Tochigi Medical Center, Pharmacy<br>Tatsumi, Shinpei; National Hospital Organization Tochigi Medical Center, Pharmacy |
| <b>Primary Subject Heading</b>: | Geriatric medicine                                                                                                                                                                                                                                                                                                                                         |
| Secondary Subject Heading:      | Pharmacology and therapeutics                                                                                                                                                                                                                                                                                                                              |
| Keywords:                       | CLINICAL PHARMACOLOGY, ORTHOPAEDIC & TRAUMA SURGERY, GERIATRIC MEDICINE                                                                                                                                                                                                                                                                                    |
|                                 |                                                                                                                                                                                                                                                                                                                                                            |

SCHOLARONE™  
Manuscripts

1 **A study protocol for a single-centre, prospective, non-blinded, randomised,**  
2 **12-month, parallel-group superiority study to compare the efficacy of pharmacist**  
3 **intervention *versus* usual care for elderly patients hospitalised in orthopaedic**  
4 **wards**

5  
6 Junpei Komagamine, MD<sup>1</sup>; Kenichi Sugawara<sup>2</sup>; Miho Kaminaga<sup>2</sup>; Shinpei Tatsumi<sup>2</sup>

7  
8 <sup>1</sup>Department of Internal Medicine, National Hospital Organization Tochigi Medical  
9 Center, 1-10-37, Nakatomatsuri, Utsunomiya, Tochigi 3208580, Japan.

10 <sup>2</sup>Department of Pharmacy, National Hospital Organization Tochigi Medical Center,  
11 1-10-37, Nakatomatsuri, Utsunomiya, Tochigi 3208580, Japan.

12  
13 **Running title:** Pharmacist interventions

14 **Word count:** 278 (abstract) and 3691 (main text)

15 **Source of support:** None

16

- 1  
2  
3  
4  
5  
6 17 **Corresponding author:** Junpei Komagamine, MD, Department of Internal Medicine,  
7  
8  
9 18 National Hospital Organization Tochigi Medical Center, 1-10-37, Nakatomatsuri,  
10  
11 19 Utsunomiya, Tochigi 3208580, Japan.  
12  
13  
14 20 **Tel.:** +81-28-622-5241, **E-mail:** junpei0919@yahoo.co.jp  
15  
16  
17  
18  
19  
20  
21  
22  
23  
24  
25  
26  
27  
28  
29  
30  
31  
32  
33  
34  
35  
36  
37  
38  
39  
40  
41  
42  
43  
44  
45  
46  
47  
48  
49  
50  
51  
52  
53  
54  
55  
56  
57  
58  
59  
60

1  
2  
3  
4  
5  
6 21 **ABSTRACT**

7  
8 22 **Introduction:** Given that polypharmacy and potentially inappropriate prescribing are  
9  
10  
11 23 common in elderly orthopaedic patients, pharmacist interventions to improve  
12  
13  
14 24 medication practices among this population are important. However, past studies have  
15  
16  
17 25 reported mixed results regarding the effectiveness of pharmacist-led interventions in  
18  
19  
20 26 inpatient elderly care. Furthermore, few randomised controlled trials have evaluated  
21  
22  
23 27 patient-relevant outcomes as a primary endpoint. Therefore, we will evaluate whether a  
24  
25  
26 28 pharmacist-led intervention could reduce readmission of hospitalised elderly  
27  
28  
29 29 orthopaedic patients with polypharmacy or potentially inappropriate prescribing.

30 30 **Methods and analysis:** This is an ongoing single-centre, prospective, non-blinded,  
31  
32  
33 31 randomised controlled trial designed to evaluate the superiority of a pharmacist-led  
34  
35  
36 32 intervention for hospitalised elderly patients compared with usual care. The trial will  
37  
38  
39 33 include newly admitted orthopaedic patients 70 years of age and older with  
40  
41  
42 34 polypharmacy or at least one potentially inappropriate prescription, as identified by the  
43  
44  
45 35 2015 STOPP criteria. Usual care includes medication reconciliation, patient education,  
46  
47  
48 36 and monitoring, as well as providing information about discharge medications.  
49  
50  
51 37 Pharmacist interventions, in addition to usual care, include advising the patient's  
52  
53  
54 38 physician to stop unnecessary or inappropriate medications and start necessary  
55  
56  
57  
58  
59  
60

1  
2  
3  
4  
5  
6 39 medications. The primary outcome is the one-year readmission rate. Secondary  
7  
8  
9 40 outcomes are the proportion of patients who undergo emergency department visits and  
10  
11 41 the occurrences of all-cause death, a new fracture, myocardial infarction, and ischaemic  
12  
13  
14 42 stroke. The study started in November 2017, and up to approximately 220 patients will  
15  
16  
17 43 be enrolled.

18  
19  
20 44 **Ethics and dissemination:** The protocol was approved by the Medical Ethics  
21  
22 45 Committee of the National Hospital Organization Tochigi Medical Center (No. 29-22).  
23  
24  
25 46 The trial was registered at the UMIN clinical registry. The results of this trial will be  
26  
27  
28 47 submitted for publication in a peer-reviewed journal.

29  
30  
31 48 **Trial registration number:** UMIN000029404 (registered October 3, 2017).  
32  
33

34  
35  
36  
37 50 **Key words:** Emergency, Orthopaedic ward, Pharmacist intervention, Polypharmacy,  
38  
39 51 Potentially inappropriate prescribing  
40  
41

#### 42 43 44 45 53 **Strengths and limitations of this study**

- 46  
47  
48 54 ● This randomised controlled trial will evaluate the effectiveness of pharmacist  
49  
50  
51 55 interventions for hospitalised orthopaedic elderly patients, using  
52  
53  
54 56 patient-relevant outcomes as the primary outcomes.

- 1  
2  
3  
4  
5  
6 57 ● This is a single-centre study with a small sample size and short-term  
7  
8  
9 58 follow-up.  
10  
11 59 ● Orthopaedic patients who are admitted electively or discharged within less  
12  
13  
14 60 than seven days after admission will be excluded.  
15  
16  
17 61 ● Orthopaedic patients who are prescribed fewer than five medications and are  
18  
19  
20 62 taking no potentially inappropriate medications at admission will be excluded.  
21  
22  
23  
24  
25  
26  
27  
28  
29  
30  
31  
32  
33  
34  
35  
36  
37  
38  
39  
40  
41  
42  
43  
44  
45  
46  
47  
48  
49  
50  
51  
52  
53  
54  
55  
56  
57  
58  
59  
60



## 63 INTRODUCTION

64 In recent decades, as the population has aged, polypharmacy and multi-morbidities have  
65 become more complicated problems among elderly patients.[1-3] Polypharmacy in  
66 elderly patients is associated with inappropriate prescribing[4] and adverse events, such  
67 as adverse drug events and death.[5] Because adverse drug events are a primary cause  
68 of preventable hospital admissions among elderly patients,[6] strategies to prevent  
69 drug-related events has been proposed in recent decades.[7-9] These strategies include  
70 deprescribing for polypharmacy[9] and reducing potentially inappropriate prescribing  
71 and potential prescription omissions.[7,8]

72 Polypharmacy and potentially inappropriate prescribing among elderly patients  
73 are particularly common in acute care settings compared with primary care  
74 settings.[10-12] Therefore, it is important to improve the appropriateness of medications  
75 used during hospitalisation. In fact, the American College of Emergency Physicians  
76 Geriatric Emergency Department Guidelines recommend a multidisciplinary team  
77 intervention for all elderly patients who present to the emergency department and are  
78 prescribed more than five medications or at least one potentially inappropriate  
79 medication, regardless of the presenting complaint.[13] Given that physicians are often  
80 unaware of adverse drug events,[14,15] the role of hospital pharmacists in improving

1  
2  
3  
4  
5  
6 81 polypharmacy and potentially inappropriate prescribing in hospitalised elderly patients  
7  
8  
9 82 is important. Nonetheless, past studies have reported mixed results regarding the  
10  
11 83 effectiveness of a pharmacist-led intervention in improving the appropriateness of  
12  
13  
14 84 medications in inpatient elderly care. Although pharmacist intervention can improve the  
15  
16  
17 85 appropriateness of medications in hospitalised elderly patients,[16] the conclusions of  
18  
19  
20 86 past systematic reviews and meta-analyses have been inconsistent regarding whether  
21  
22  
23 87 patient-relevant outcomes, such as mortality and readmission, were improved by these  
24  
25  
26 88 interventions.[17-20] One recent meta-analysis that included seven randomised  
27  
28  
29 89 controlled trials that evaluated the effectiveness of a pharmacist-led intervention in  
30  
31  
32 90 inpatient elderly care also reported little impact of pharmacist interventions on  
33  
34  
35 91 readmission rates.[21] However, most trials included in this meta-analysis were  
36  
37  
38 92 considered to have a high risk of bias. Furthermore, only two of the seven randomised  
39  
40  
41 93 controlled trials included in the meta-analysis evaluated patient-relevant outcomes as  
42  
43  
44 94 primary endpoints.[22,23] In one of those two trials, a comprehensive pharmacist  
45  
46  
47 95 intervention for hospitalised elderly patients with polypharmacy led to a significant  
48  
49  
50 96 reduction in hospital visits.[23] Therefore, it is still too early to conclude that  
51  
52  
53 97 pharmacist-led interventions for hospitalised elderly patients do not improve  
54  
55  
56 98 patient-relevant outcomes. Furthermore, most studies have targeted internal medicine

1  
2  
3  
4  
5  
6 99 patients, while few studies have ever investigated the effectiveness of pharmacist  
7  
8  
9 100 interventions for elderly patients hospitalised in an orthopaedic ward.[21] The  
10  
11 101 prevalence of polypharmacy and potentially inappropriate prescribing are particularly  
12  
13  
14 102 high in elderly orthopaedic patients, and these practices often continue after recovery  
15  
16  
17 103 from a fracture.[24,25] Furthermore, polypharmacy is associated with an increased risk  
18  
19  
20 104 of fall and fracture.[5,26] Therefore, pharmacist interventions for improving the  
21  
22  
23 105 appropriateness of medications in hospitalised elderly orthopaedic patients may be  
24  
25  
26 106 associated with better patient outcomes compared with other settings. Thus, we will  
27  
28  
29 107 conduct a randomised controlled trial to evaluate whether a pharmacist-led intervention  
30  
31  
32 108 reduces readmission in hospitalised elderly orthopaedic patients with polypharmacy or  
33  
34  
35 109 potentially inappropriate prescribing.  
36  
37  
38 110  
39  
40

## 111 **Objectives**

### 112 *Primary objective*

113 Our primary objective is to determine whether pharmacist intervention for elderly  
114 orthopaedic patients with polypharmacy or potentially inappropriate prescribing at  
115 admission reduces one-year readmission rates compared with usual care. Based on a

1  
2  
3  
4  
5  
6 116 past study,[23] we selected a readmission time frame of one year for the primary  
7  
8  
9 117 objective.

10  
11  
12 118

13  
14  
15  
16 119 *Secondary objectives*

17  
18  
19 120 The key secondary objectives are to determine whether pharmacist intervention for  
20  
21  
22 121 elderly orthopaedic patients with polypharmacy or potentially inappropriate prescribing  
23  
24  
25 122 at admission reduces patient-relevant outcomes, such as all-cause death, myocardial  
26  
27  
28 123 infarction, ischaemic stroke, and any fractures, compared with usual care. Other  
29  
30  
31 124 secondary objectives are to determine whether pharmacist intervention for elderly  
32  
33  
34 125 orthopaedic patients with polypharmacy or potentially inappropriate prescribing at  
35  
36  
37 126 admission reduces the total number of medications, potentially inappropriate  
38  
39 127 prescribing, and potential prescription omissions.  
40

41  
42  
43 128

44  
45  
46 129 **Literature search and review**

47  
48  
49  
50 130 We performed a literature search and review of pharmacist interventions in elderly  
51  
52  
53 131 hospitalised orthopaedic patients. We used the terms “pharmacist”, “polypharmacy”,  
54  
55  
56  
57  
58  
59

1  
2  
3  
4  
5  
6 132 “medication review”, and “inappropriate prescribing” alone and in combination to  
7  
8  
9 133 search the PubMed and Google Scholar databases until 5 August 2017 without limits for  
10  
11 134 the year when the articles were published. We restricted our review to full-text articles  
12  
13  
14 135 published in English or Japanese. We also identified references from the relevant  
15  
16  
17 136 articles. We primarily selected randomised controlled trials, systematic reviews, and  
18  
19  
20 137 meta-analyses. We found a recent systematic review regarding the effectiveness of  
21  
22  
23 138 pharmacist-led intervention on patient outcomes in elderly hospitalised patients.[21]  
24  
25  
26 139 Based on this systematic review, we designed this trial.  
27  
28  
29  
30  
31

## 32 141 **METHODS AND ANALYSIS**

### 33 34 35 142 **Trial design**

36  
37 143 This study is a single-centre, prospective, non-blinded, randomised, controlled,  
38  
39  
40 144 superiority trial with two parallel groups. All participants who provide consent for  
41  
42  
43 145 participation and fulfil the inclusion criteria will be randomly assigned to the pharmacist  
44  
45  
46 146 intervention group or the usual care group with a 1:1 allocation. The study was  
47  
48  
49 147 approved by the Medical Ethics Committee of the National Hospital Organization  
50  
51  
52 148 Tochigi Medical Center (No. 29-22) and will be conducted in accordance with the  
53  
54  
55 149 Declaration of Helsinki. Standard Protocol Items: The Recommendations for  
56  
57  
58  
59  
60

1  
2  
3  
4  
5  
6 150 Interventional Trials (SPIRIT checklist)[27] was followed in designing the study  
7  
8  
9 151 protocol (supplementary appendix). Figure 1 summarises the design of the trial, and  
10  
11  
12 152 each of the trial aspects is described in detail below.  
13  
14  
15  
16  
17  
18

19 154 **Study setting**

20  
21  
22 155 This study will be conducted in the orthopaedic ward at the National Hospital  
23  
24  
25 156 Organization Tochigi Medical Center. Our hospital is a 350-bed acute care community  
26  
27  
28 157 hospital and is one of five main hospitals that serve approximately 0.5 million  
29  
30  
31 158 individuals in Utsunomiya in the Tochigi prefecture in Japan.  
32  
33  
34  
35  
36

37 160 **Eligibility criteria**

38  
39  
40 161 Eligible patients are those who meet all the following inclusion criteria and who do not  
41  
42  
43 162 have any listed exclusion criteria. Based on the American College of Emergency  
44  
45  
46 163 Physicians Geriatric Emergency Department Guidelines,[11] the number of medications  
47  
48  
49 164 taken or the presence of potentially inappropriate prescribing at admission will be used  
50  
51  
52 165 as the inclusion criteria. However, the minimum number of medications for inclusion  
53  
54  
55 166 will be five, based on a past study showing that taking five or more medications was a  
56  
57  
58  
59  
60

1  
2  
3  
4  
5  
6 167 useful parameter for estimating medication-related adverse effects related to frailty,  
7  
8  
9 168 disability, and mortality among men aged 70 years and older.[28] As-needed  
10  
11 169 medications will be not be considered in the medication count.  
12  
13  
14  
15  
16

17 171 *Inclusion criteria*

- 18  
19  
20 172 1. Age 70 years and older  
21  
22  
23 173 2. Polypharmacy (defined as 5 or more medications) or at least one potentially  
24  
25 174 inappropriate prescription (as defined by the 2015 STOPP criteria[8]) upon  
26  
27  
28 175 admission  
29  
30

31 176

32  
33  
34 177 *Exclusion criteria*

- 35  
36  
37 178 1. Elective admission  
38  
39  
40 179 2. Inability to contact patient within 72 hours after their admission  
41  
42  
43 180 3. Expected hospital stay duration of < one week  
44

45 181

46  
47  
48 182 **Study duration, enrolment and number of sites**

49  
50  
51 183 The study will be conducted at a single hospital in Japan. The planned sample size is  
52  
53  
54 184 approximately 220 patients. This study began after November 2017. The planned  
55  
56  
57  
58  
59  
60

1  
2  
3  
4  
5  
6 185 follow-up duration for each patient will be two years after the randomisation. Our  
7  
8  
9 186 investigation period is projected to be three years. However, unless we can recruit the  
10  
11  
12 187 planned number of patients within three years after beginning this study, we will extend  
13  
14  
15 188 the investigation duration to achieve the planned number of patients.  
16  
17

18  
19  
20  
21 189

### 22 23 24 25 26 27 28 29 30 31 32 33 34 35 36 37 38 39 40 41 42 43 44 45 46 47 48 49 50 51 52 53 54 55 56 57 58 59 60

20 190 **Screening and registration**

21  
22  
23 191 All elderly patients who are hospitalised in an orthopaedic ward in our hospital will be  
24  
25  
26 192 screened for eligibility for the trial by one of three pharmacists (KS, ST, or MK) every  
27  
28  
29 193 weekday morning. Patients who are hospitalised on weekends will be screened on the  
30  
31  
32 194 following Monday morning. If the screened patients are not eligible, we will document  
33  
34  
35 195 the reason for ineligibility for the trial and the number of ineligible patients. All patients  
36  
37  
38 196 who fulfil the inclusion criteria and have no exclusion criteria will be registered by one  
39  
40  
41 197 of three pharmacists in the central data centre at the National Hospital Organization  
42  
43  
44 198 Tochigi Medical Center. Unless written informed consent is provided by the patients,  
45  
46  
47 199 we will document the reasons why the patients did not provide consent to participate in  
48  
49  
50 200 the trial and document the number of patients who declined to participate in the trial.  
51  
52  
53  
54  
55  
56  
57  
58  
59  
60

201



1  
2  
3  
4  
5  
6 202 **Randomisation and allocation concealment**  
7

8  
9 203 All patients who provide consent for participation and who fulfil the inclusion criteria  
10  
11  
12 204 will be randomised. Randomisation will be requested by one of three pharmacists (KS,  
13  
14  
15 205 ST, or MK) to the independent randomisation centre at the National Hospital  
16  
17  
18 206 Organization Tochigi Medical Center via webmail. Participants will be randomly  
19  
20  
21 207 assigned to either the pharmacist intervention group or the usual care group.  
22  
23  
24 208 Randomisation will be performed as block randomisation with a 1:1 allocation. The  
25  
26  
27 209 computer-generated random allocation sequence will be provided by an independent  
28  
29  
30 210 staff pharmacist who is not involved in the treatment of patients or with the assessment  
31  
32  
33 211 of patient outcomes. The randomisation will not be stratified. The block sizes will be  
34  
35  
36 212 concealed until the primary outcome is analysed. Throughout the study, the  
37  
38  
39 213 randomisation list will also be concealed until the end of the study.  
40

41 214

42  
43  
44  
45 215 **Blinding**  
46

47  
48 216 Due to the nature of the intervention, neither the participants nor the clinical  
49  
50  
51 217 pharmacists can be blinded to the allocation. Patients will be informed of the group to  
52  
53  
54 218 which they have been randomly allocated. Assessments regarding the outcomes will be  
55  
56  
57  
58  
59  
60

1  
2  
3  
4  
5  
6 219 conducted by an assessor who knows the treatment allocation. The analysis regarding  
7  
8 220 the primary outcome will be conducted by independent investigators who are blinded to  
9  
10  
11 221 the treatment allocation and are not involved in the assessment of patient outcomes.  
12  
13  
14  
15 222

### 18 223 **Pharmacist intervention group**

20  
21  
22 224 Before starting the study, three study pharmacists (KS, ST, and MK) were trained  
23  
24  
25 225 during a three-month period from May 2017 to July 2017. To standardise the  
26  
27  
28 226 intervention by these pharmacists, approximately 16 sessions (one hour per session)  
29  
30  
31 227 regarding medication use in elderly patients based on the 2015 STOPP/START  
32  
33 228 criteria[8] were provided by one internal medicine physician (JK). Therefore, these  
34  
35  
36 229 pharmacists will perform the interventions by following the 2015 STOPP/START  
37  
38  
39 230 criteria. However, the use of these criteria for the pharmacist intervention will not be  
40  
41  
42 231 mandatory because some criteria have uncertain applicability to Japanese patients. For  
43  
44  
45 232 example, according to the 2015 START criteria, statin therapy is recommended for  
46  
47  
48 233 patients with a past history of cerebral vascular disease unless the patient's status is  
49  
50  
51 234 end-of-life or the patient is aged >85 years. However, the effectiveness of statin therapy  
52  
53  
54 235 for ischaemic stroke patients without dyslipidaemia has not been clearly demonstrated  
55  
56  
57  
58  
59  
60

1  
2  
3  
4  
5  
6 236 in Japan.[29] One of these trained pharmacists (KS, ST, or MK) will treat the

7  
8  
9 237 participants from admission to discharge at the following three stages.

10  
11  
12 238

13  
14  
15  
16 239 *Intervention at admission*

17  
18  
19 240 A comprehensive list of current medications will be compiled within 72 hours after

20  
21  
22 241 admission. A drug review will be performed, and advice regarding the following factors

23  
24  
25 242 will be provided to one of five orthopaedic physicians who care for patients: (1)

26  
27  
28 243 deprescribing inappropriate or unnecessary medications, (2) starting effective or

29  
30  
31 244 necessary medications, and (3) modifying medication dosages. However, the final

32  
33  
34 245 decision to adhere to the advice provided by pharmacists will be determined by the

35  
36  
37 246 orthopaedic physician in charge. Pharmacists will document whether the orthopaedic

38  
39  
40 247 physicians follow their advice. If the orthopaedic physicians accept the advice but defer

41  
42  
43 248 action to the primary care physicians, pharmacists will send the discharge summary

44  
45  
46 249 including their advice to the primary care physicians.

47  
48  
49 250

50  
51  
52 251 *Intervention during hospitalisation*

1  
2  
3  
4  
5  
6 252 During the hospital stay, patients will be educated about the harms and benefits of their  
7  
8  
9 253 medications. Pharmacists will also provide information about the rationale for  
10  
11 254 medication use and therapeutic goals. Patients will be monitored after starting or  
12  
13  
14 255 stopping medications.  
15  
16  
17  
18 256

21 257 *Intervention at discharge*

25 258 Information about discharge medications (e.g., rationale for changes and monitoring  
26  
27  
28 259 needs for newly started or stopped medications) will be summarised in a written  
29  
30  
31 260 document by the pharmacists. Patients will receive discharge counselling with this  
32  
33  
34 261 summary. The summary will also be sent to the primary care physicians and community  
35  
36  
37 262 pharmacists.  
38  
39  
40 263

43 264 **Usual care group**

46  
47 265 Usual care typically includes the same elements as those received by the intervention  
48  
49  
50 266 group but is less extensive. In the usual care group, a comprehensive list of current  
51  
52  
53 267 medications will be compiled by the pharmacists (KS, ST, or MK) within 72 hours after  
54  
55  
56  
57  
58  
59  
60

1  
2  
3  
4  
5  
6 268 admission. Patients will be monitored and educated about newly started medications by  
7  
8  
9 269 their physician and will receive discharge counselling. However, unlike in the  
10  
11 270 intervention group, advice from pharmacists about deprescribing and starting  
12  
13  
14 271 medications will not be provided to the patient's physician, except in cases of apparent  
15  
16  
17 272 harmful effects of medications that are judged to be symptomatic by pharmacists.  
18  
19  
20 273 Furthermore, pharmacists will neither prepare the summary about discharge medications  
21  
22  
23 274 nor send it to the primary care physicians and community pharmacists. However, at the  
24  
25  
26 275 discretion of the pharmacist providing advice about medications for the physicians, the  
27  
28  
29 276 summary about discharge medications will be prepared. These procedures are the  
30  
31 277 standard practice for pharmacists in most Japanese hospitals.[30]  
32  
33  
34  
35  
36  
37  
38  
39  
40  
41  
42  
43  
44  
45  
46  
47  
48  
49  
50  
51  
52  
53  
54  
55  
56  
57  
58  
59  
60

278

### 279 **Data collection**

280 One of the pharmacists (ST, KS, or MK) will collect the demographic and baseline  
281 medical information from the patients and/or their caregivers at admission and  
282 summarise this information on a patient registration form. Participants will be followed  
283 and assessed for two years after study entry (Table 1). One of the pharmacists (ST, KS,  
284 or MK) will assess outcomes at discharge. We will survey the participants or their

1  
2  
3  
4  
5  
6 285 caregivers regarding information about primary and secondary outcomes by sending  
7  
8  
9 286 letters at 6 months, 12 months, and 24 months after randomisation. If the participants do  
10  
11 287 not respond to the survey appropriately, we will contact them or their caregivers by  
12  
13  
14 288 telephone to minimise the effect of missing data on study outcomes. Furthermore, to  
15  
16  
17 289 collect more accurate data, we will also use data from electronic medical records of our  
18  
19  
20 290 hospital if the participants are admitted or visit our hospital regularly during the study  
21  
22  
23 291 period.  
24  
25  
26  
27  
28  
29

## 30 293 **Outcomes**

### 31 32 33 294 *Primary outcome*

34  
35  
36  
37 295 The primary outcome is the readmission rate within one year after randomisation. The  
38  
39  
40 296 readmission rate is defined as the proportion of participants who are re-hospitalised  
41  
42  
43 297 regardless of the cause of hospitalisation (all-cause readmission). Patients who visit an  
44  
45  
46 298 emergency department but are not hospitalised will not be counted. We will evaluate the  
47  
48  
49 299 difference in the readmission rate within one year after randomisation between the two  
50  
51 300 treatment groups.  
52  
53  
54  
55  
56  
57  
58  
59  
60

1  
2  
3  
4  
5  
6 302 *Secondary outcomes*  
7  
8

9 303 The secondary outcomes are readmission rates within 6 and 24 months after  
10  
11  
12 304 randomisation. We will evaluate the differences in the readmission rates at 6 and 24  
13  
14  
15 305 months between the two treatment groups. The other secondary outcomes are provided  
16  
17  
18 306 below. These outcomes will be evaluated at discharge and at 6 months, 12 months and  
19  
20  
21 307 24 months after randomisation. We will evaluate the differences between the two  
22  
23  
24 308 treatment groups regarding these outcomes at discharge, 6 months, 12 months and 24  
25  
26  
27 309 months.

30 310 • Any-cause death

31  
32  
33 311 • Total number of medications

34  
35  
36  
37 312 • Potentially inappropriate prescribing based on the 2015 STOPP criteria[8]  
38  
39

40  
41 313 • Potential prescribing omission based on the 2015 START criteria[8]  
42  
43

44 314 • Any fractures

45  
46  
47  
48 315 • Ischaemic stroke  
49

50  
51 316 • Myocardial infarction  
52  
53

54  
55 317 • Emergency department visits  
56  
57  
58  
59  
60

1  
2  
3  
4  
5  
6 318

7  
8  
9 319 **Statistical analysis**

10  
11 320 *Sample size calculation*

12  
13  
14 321 We estimated that a sample of 200 patients would provide the study with a power of at  
15  
16  
17 322 least 80% to show a relative risk reduction of 33% for the primary outcome in the  
18  
19  
20 323 intervention group compared with the usual care group (at a two-sided alpha level of  
21  
22  
23 324 0.05), assuming that the proportion of patients who are readmitted within one year is  
24  
25  
26 325 60% in the usual care group (based on a previous study[23]). Assuming that the dropout  
27  
28  
29 326 rate is 10%, we would need to enrol approximately 220 patients.

30  
31 327

32  
33  
34 328 *Statistical analysis*

35  
36  
37 329 The baseline characteristics of the study population will be summarised using  
38  
39  
40 330 descriptive statistics. The intervention group will be compared against the usual group  
41  
42  
43 331 for all primary and secondary outcomes (Table 2). We will use a chi-squared test for  
44  
45  
46 332 binary outcomes and Student's t-test for continuous outcomes. We will calculate the  
47  
48  
49 333 relative risk and number needed to treat with corresponding 95% confidence intervals to  
50  
51  
52 334 compare dichotomous variables, and the difference in the means will be used for an



1  
2  
3  
4  
5  
6 335 additional analysis of continuous variables. For all tests, we will use 2-sided p-values  
7  
8  
9 336 with an alpha < 0.05 for the level of significance.

10  
11 337 Analyses for all outcomes will include all patients who have undergone  
12  
13  
14 338 randomisation and have provided valid informed consent (intention-to-treat population).  
15  
16  
17 339 Regarding the procedure for missing data, we will exclude the data from participants  
18  
19  
20 340 who are lost to follow-up or whose outcomes are missing. These analyses will be  
21  
22  
23 341 performed using IBM SPSS Statistics Base version 21.0 (IBM Corporation, Nihonbashi,  
24  
25  
26 342 Tokyo, Japan) or Excel statistical software package version 2.11 (Bellcurve for Excel;  
27  
28  
29 343 Social Survey Research Information Co., Ltd., Tokyo, Japan). All analyses will be  
30  
31 344 conducted by investigators who are blinded to the study group allocations.  
32  
33

34  
35  
36  
37 345

#### 37 346 **Data management**

38  
39  
40 347 The trial data of the study participants will be transmitted to and stored in the research  
41  
42  
43 348 database at National Hospital Organization Tochigi Medical Center. This data will not  
44  
45  
46 349 include the participants' identifying information. Instead, individual participants and  
47  
48  
49 350 research data will be identified by unique study identification numbers. At the end of  
50  
51  
52 351 the study, the data will be locked. The data will be stored for at least five years after  
53  
54  
55 352 study completion. Access to the stored data will be limited to investigators. The data  
56  
57  
58  
59  
60

1  
2  
3  
4  
5  
6 353 will be stored using codes assigned by the investigators and kept on password-protected  
7  
8  
9 354 computers.

10  
11  
12 355

13  
14  
15 356 **Monitoring**

16  
17  
18 357 *Data monitoring*

19  
20  
21 358 The risk associated with participation in this study is low, because our aim is to improve  
22  
23  
24 359 the quality of medications in patients. According to the Japanese Ethical Guidelines for  
25  
26  
27 360 Medical and Health Research Involving Human Subjects (as of March 2015), our  
28  
29  
30 361 intervention corresponds with a non-invasive procedure. Therefore, we will not need a  
31  
32  
33 362 data monitoring committee. However, an independent staff pharmacist who is not  
34  
35  
36 363 involved with the trial intervention will monitor the data periodically to ensure safety.

37  
38  
39 364

40  
41  
42  
43 365 *Adverse events*

44  
45  
46 366 In our study, an adverse event will be defined as any undesirable medical occurrence in  
47  
48  
49 367 a participant without regard to the possibility of a causal relationship. Data on adverse  
50  
51  
52 368 events will be collected after the participants have provided consent and enrolled in the  
53  
54  
55 369 study. If a participant experiences an adverse event after the informed consent document

1  
2  
3  
4  
5  
6 370 is signed and the participant has not yet started to receive the study intervention, the  
7  
8  
9 371 event will be reported as not being related to the study intervention. All adverse events  
10  
11 372 that occur after entry into the study and for two years after randomisation will be  
12  
13  
14 373 recorded. A serious adverse event for this study is any undesirable medical occurrence  
15  
16  
17 374 that is believed by the investigators to be causally related to the study intervention and  
18  
19  
20 375 results in any of the following: a life-threatening condition (that is, immediate risk of  
21  
22  
23 376 death) or severe or permanent disability.  
24  
25

26 377

### 30 378 *Auditing*

31  
32  
33 379 According to the Japanese Ethical Guidelines for Medical and Health Research  
34  
35  
36 380 Involving Human Subjects (as of March 2015), our intervention corresponds with a  
37  
38  
39 381 non-invasive procedure. Furthermore, past studies investigating the effectiveness of a  
40  
41  
42 382 pharmacist intervention have reported few adverse events.[16-23] Therefore, we will  
43  
44  
45 383 not need auditing.  
46  
47

48 384

### 51 385 **Ethics and dissemination**

1  
2  
3  
4  
5  
6 386 This study protocol was approved by the Medical Ethics Committee of the National  
7  
8  
9 387 Hospital Organization Tochigi Medical Center (Tochigi, Japan). They judged the study  
10  
11 388 design, ethics, and safety. Substantial amendments to the study protocol must be  
12  
13  
14 389 approved by the Medical Ethics Committee of the National Hospital Organization  
15  
16  
17 390 Tochigi Medical Center. The trial was registered at the UMIN clinical registry on  
18  
19  
20 391 October 3, 2017. We will obtain informed consent from the trial participants or their  
21  
22  
23 392 authorised surrogates according to the Japanese Ethical Guidelines for Medical and  
24  
25  
26 393 Health Research Involving Human Subjects (as of March 2015). One of three  
27  
28  
29 394 pharmacists (ST, KS, or MK) will introduce the trial to patients and discuss the trial  
30  
31  
32 395 with all patients using the information sheets about the nature, purpose, and possible  
33  
34 396 risks and benefits of the trial, which was approved by the Medical Ethics Committee of  
35  
36  
37 397 the National Hospital Organization Tochigi Medical Center. Then, the pharmacists will  
38  
39  
40 398 obtain written informed consent from patients willing to participate in the trial. To  
41  
42  
43 399 assure confidentiality, trial participants will be allocated a unique trial identification  
44  
45  
46 400 number throughout the trial. A manuscript with the results of this study will be  
47  
48  
49 401 published in a peer-reviewed journal.  
50  
51  
52  
53  
54 403 **Patient involvement**  
55  
56  
57  
58  
59  
60

1  
2  
3  
4  
5  
6 404 No patients were involved in determining the research question or outcome measures  
7  
8  
9 405 nor were any patients involved in developing plans to design or implement the study.  
10  
11 406 No patients were involved in evaluating the burden of the intervention. There are no  
12  
13  
14 407 plans to disseminate the results of this research to study participants or the relevant  
15  
16  
17 408 patient community.  
18  
19  
20  
21  
22

## 23 410 **DISCUSSION**

24  
25 411 Given that polypharmacy and potentially inappropriate prescribing among  
26  
27  
28 412 elderly patients is common in acute care settings,[10] it is important to improve the  
29  
30  
31 413 appropriateness of medications during hospitalisation. Therefore, the role of hospital  
32  
33  
34 414 pharmacists in improving polypharmacy and potentially inappropriate prescribing in  
35  
36  
37 415 hospitalised elderly patients is important. Nonetheless, there are conflicting results  
38  
39  
40 416 regarding the effectiveness with which pharmacist interventions in elderly inpatient care  
41  
42  
43 417 can improve polypharmacy and potentially inappropriate prescribing to affect  
44  
45  
46 418 patient-relevant outcomes.[17-21] Given that few past randomised controlled trials have  
47  
48  
49 419 evaluated a patient-relevant outcome as a primary endpoint,[22,23] it is important to  
50  
51 420 conduct a randomised controlled trial to evaluate whether a pharmacist-led intervention  
52  
53  
54  
55  
56  
57  
58  
59  
60

1  
2  
3  
4  
5  
6 421 improves patient-relevant outcomes, such as readmission and death, in hospitalised  
7  
8 422 elderly orthopaedic patients with polypharmacy or potentially inappropriate prescribing.  
9

10  
11  
12 423       There are several limitations to this study. First, the non-blinded study design  
13  
14  
15 424 may overestimate the effectiveness of pharmacist intervention.[31] However, due to the  
16  
17  
18 425 nature of the intervention, it is difficult for both participants and clinical pharmacists to  
19  
20  
21 426 be blinded to the allocation. Second, this study is a single-centre trial. Although most  
22  
23  
24 427 past randomised controlled trials were also single-centre trials,[21,23,32-35] the  
25  
26  
27 428 external validity of this study is limited. Therefore, an additional randomised controlled  
28  
29  
30 429 trial may be needed. Third, we will exclude elderly orthopaedic patients who are  
31  
32  
33 430 admitted electively or who are taking less than five prescribed medications or have no  
34  
35  
36 431 potentially inappropriate prescriptions. Furthermore, elderly patients admitted to other  
37  
38  
39 432 specialty wards, such as internal medicine or general surgery, will also be excluded.  
40  
41  
42 433 Therefore, it is unclear whether the findings of this trial will be applicable to elderly  
43  
44  
45 434 patients who are admitted electively or to other wards besides the orthopaedic ward.  
46  
47  
48 435 Fourth, medication reconciliation is included in the usual care group in this study. The  
49  
50  
51 436 possible beneficial effect of medical reconciliation for hospitalised patients[36] may  
52  
53  
54 437 mitigate the effectiveness of the pharmacist intervention in this study. Finally, we will  
55  
56  
57 438 not assess the cost-effectiveness of the intervention.  
58  
59  
60

1  
2  
3  
4  
5  
6 439 Although these limitations are important, this study is one of a few randomised  
7  
8  
9 440 controlled trials to investigate the effectiveness of a pharmacist-led intervention and use  
10  
11 441 a patient-relevant outcome as the primary outcome for hospitalised elderly patients.

12  
13  
14 442 Given that the burdens of polypharmacy and multi-morbidities among elderly patients  
15  
16  
17 443 have increased in recent years, this trial will provide important information on  
18  
19  
20 444 improving the acute care of elderly patients with polypharmacy or potentially  
21  
22  
23 445 inappropriate prescribing.

24  
25  
26 446

27  
28 447 **Acknowledgements:** None.

29  
30  
31 448

32  
33  
34 449 **Contributors:** KS and JK conceived the project. JK performed the literature search and  
35  
36  
37 450 review. KS, JK, ST, and MK designed the study. KS and JK wrote the draft of the  
38  
39  
40 451 protocol for the study. All authors contributed equally to writing the original protocol  
41  
42  
43 452 for this study. KS is the chief investigator of this study. JK wrote the draft of this  
44  
45  
46 453 manuscript. All authors provided final approval for submission of this manuscript for  
47  
48  
49 454 publication consideration.

50  
51 455

1  
2  
3  
4  
5  
6 456 **Competing interests:** All authors have completed the ICMJE unified disclosure from  
7  
8  
9 457 competing interest form at [www.icmje.org/coi\\_disclosure.pdf](http://www.icmje.org/coi_disclosure.pdf) (available upon request  
10  
11 458 from the corresponding author). All authors declare that they have no conflicts of  
12  
13  
14 459 interest.

15  
16  
17 460  
18  
19  
20 461 **Funding:** This study is investigator initiated and self-funded. It is not supported by a  
21  
22 462 specific grant from any funding agency in the public, commercial, or not-for-profit  
23  
24 463 sector.

25  
26  
27 464  
28  
29  
30  
31 465 **Ethical approval:** This study was approved by the Medical Ethics Committee of the  
32  
33 466 National Hospital Organization Tochigi Medical Center (No. 29-22).

34  
35  
36  
37 467  
38  
39 468 **REFERENCES**

- 40  
41  
42 469 1 Wolff JL, Starfield B, Anderson G. Prevalence, expenditures, and complications of  
43  
44 470 multiple chronic conditions in the elderly. *Arch Intern Med* 2002;162:2269-76.  
45  
46 471 doi:10.1001/archinte.162.20.2269.  
47  
48  
49  
50  
51 472 2 Kaufman DW, Kelly JP, Rosenberg L et al. Recent patterns of medication use in the  
52  
53 473 ambulatory adult population of the United States: The Slone survey. *JAMA*



- 1  
2  
3  
4  
5  
6 474 2002;287:337-44. doi:10.1001/jama.287.3.337.  
7  
8  
9 475 3 Boyd CM, Dare J, Boulton C, et al. Clinical practice guidelines and quality of care for  
10  
11 476 older patients with multiple comorbid diseases. *JAMA* 2005;294:716-24.  
12  
13  
14 477 doi:10.1001/jama.294.6.716.  
15  
16  
17 478 4 Steinman MA, Landefeld CS, Rosenthal GE, et al. Polypharmacy and prescribing  
18  
19  
20 479 quality in older people. *J Am Geriatr Soc* 2006;54:1516-23.  
21  
22  
23 480 doi:10.1111/j.1532-5415.2006.00889.x.  
24  
25  
26 481 5 Fried TR, O'Leary J, Towle V, et al. Health outcomes associated with polypharmacy  
27  
28 482 in community-dwelling older adults: a systematic review. *J Am Geriatr Soc*  
29  
30  
31 483 2014;62:2261-72. doi:10.1111/jgs.13153.  
32  
33  
34 484 6 Beijer HJ, de Blaey CJ. Hospitalisations caused by adverse drug reactions (ADR): a  
35  
36  
37 485 meta-analysis of observational studies. *Pharm World Sci* 2002;24:46-54.  
38  
39  
40 486 doi:10.1023/A:1015570104121.  
41  
42  
43 487 7 The American Geriatrics Society 2015 Beers Criteria Update Expert Panel.  
44  
45 488 American Geriatrics Society 2015 updated Beers Criteria for potentially  
46  
47  
48 489 inappropriate medication use in older adults. *J Am Geriatr Soc* 2015;63:2227-46.  
49  
50  
51 490 doi:10.1111/jgs.13702.  
52  
53  
54 491 8 O'Mahony D, O'Sullivan D, Byrne S, et al. STOPP/START criteria for potentially  
55  
56  
57  
58  
59  
60

- 1  
2  
3  
4  
5  
6 492 inappropriate prescribing in older people: version 2. *Age Ageing* 2015;44:213-8.  
7  
8  
9 493 doi:10.1093/ageing/aful145.  
10  
11 494 9 Scott IA, Hilmer SN, Reeve E, et al. Reducing inappropriate polypharmacy: the  
12  
13  
14 495 process of deprescribing. *JAMA Intern Med* 2015;175(5):827-34.  
15  
16  
17 496 doi:10.1001/jamainternmed.2015.0324.  
18  
19  
20 497 10 Gallagher P, Lang PO, Cherubini A, et al. Prevalence of potentially inappropriate  
21  
22  
23 498 prescribing in an acutely ill population of older patients admitted to six European  
24  
25  
26 499 hospitals. *Eur J Clin Pharmacol* 2011;67:1175-88. doi:10.1007/s00228-011-1061-0.  
27  
28  
29 500 11 Tommelein E, Mehuys E, Petrovic M, et al. Potentially inappropriate prescribing in  
30  
31 501 community-dwelling older people across Europe: a systematic literature review. *Eur*  
32  
33  
34 502 *J Clin Pharmacol* 2015;71(12):1415-27. doi:10.1007/s00228-015-1954-4.  
35  
36  
37 503 12 Opondo D, Eslami S, Visscher S, et al. Inappropriateness of medication prescriptions  
38  
39  
40 504 to elderly patients in the primary care setting: a systematic review. *PLoS ONE*  
41  
42  
43 505 2012;7(8):e43617. doi:10.1371/journal.pone.0043617.  
44  
45  
46 506 13 The American College of Emergency Physicians, the American Geriatrics Society,  
47  
48  
49 507 Emergency Nurses Association and the Society for Academic Emergency Medicine.  
50  
51  
52 508 Geriatric emergency department guidelines. *Ann Emerg Med* 2014;63:e7-e25. doi:  
53  
54  
55 509 10.1016/j.annemergmed.2014.02.008.  
56  
57  
58  
59  
60

- 1  
2  
3  
4  
5  
6 510 14 Hohl CM, Zed PJ, Brubacher JR, et al. Do emergency physicians attribute  
7  
8 511 drug-related emergency department visits to medication-related problems? *Ann*  
9  
10  
11 512 *Emerg Med* 2010;55:493-502. doi:10.1016/j.annemergmed.2009.10.008.  
12  
13  
14 513 15 Gandhi TK, Weingart SN, Borus J, et al. Adverse drug events in ambulatory care.  
15  
16 514 *New Engl J Med* 2003;348:1556-64. doi:10.1056/NEJMsa020703  
17  
18  
19  
20 515 16 Walsh KA, O’Riordan D, Kearney PM, et al. Improving the appropriateness of  
21  
22 516 prescribing in older patients: a systematic review and meta-analysis of pharmacists’  
23  
24 517 interventions in secondary care. *Age Ageing* 2016;45:201-9.  
25  
26 518 doi:10.1093/ageing/afv190.  
27  
28  
29  
30  
31 519 17 Kaboli PJ, Hoth AB, McClimon BJ, et al. Clinical pharmacists and inpatient  
32  
33 520 medical care: a systematic review. *Arch Intern Med* 2006;166:955-64.  
34  
35 521 doi:10.1001/archinte.166.9.955.  
36  
37  
38  
39  
40 522 18 Holland R, Desborough J, Goodyer L, et al. Does pharmacist-led medication review  
41  
42 523 help to reduce hospital admissions and deaths in older people? A systematic review  
43  
44 524 and meta-analysis. *Br J Clin Pharmacol* 2007;65(3):303-16.  
45  
46 525 doi:10.1111/j.1365-2125.2007.03071.x.  
47  
48  
49  
50  
51  
52  
53  
54  
55  
56  
57  
58  
59  
60

- 1  
2  
3  
4  
5  
6 526 19 Koshman SL, CHarrois TL, Simpson SH, et al. Pharmacist care of patients with heart  
7  
8  
9 527 failure: a systematic review of randomized trials. *Arch Intern Med*  
10  
11 528 2008;168(7):687-94. doi:10.1001/archinte.168.7.687.  
12  
13  
14 529 20 Renaudin P, Boyer L, Esteve MA, et al. Do pharmacist-led medication reviews in  
15  
16  
17 530 hospitals help reduce hospital readmissions? A systematic review and meta-analysis.  
18  
19  
20 531 *Br J Clin Pharm* 2016;82:1660-73. doi:10.1111/bcp.13085.  
21  
22  
23 532 21 Thomas R, Huntley AL, Mann M, et al. Pharmacist-led interventions to reduce  
24  
25  
26 533 unplanned admissions for older people: a systematic review and meta-analysis of  
27  
28  
29 534 randomised controlled trials. *Age Ageing* 2014;43:174-87.  
30  
31 535 doi:10.1093/ageing/aft169.  
32  
33  
34 536 22 Nazareth I, Burton A, Shulman S, et al. A pharmacy discharge plan for hospitalized  
35  
36  
37 537 elderly patients: a randomized controlled trial. *Age Ageing* 2001;30:33-40.  
38  
39  
40 538 doi:10.1093/ageing/30.1.33.  
41  
42  
43 539 23 Gillespie U, Alassaad A, Henrohn D, et al. A comprehensive pharmacist  
44  
45  
46 540 intervention to reduce morbidity in patients 80 years or older: a randomized  
47  
48  
49 541 controlled trial. *Arch Intern Med* 2009;169(9):894-900.  
50  
51 542 doi:10.1001/archinternmed.2009.71.  
52  
53  
54  
55  
56  
57  
58  
59  
60

- 1  
2  
3  
4  
5  
6 543 24 McMahon CG, Cahir CA, Kenny RA, et al. Inappropriate prescribing in older fallers  
7  
8  
9 544 presenting to an Irish emergency department. *Age Ageing* 2014;43:44-50.  
10  
11 545 doi:10.1093/ageing/aft114.  
12  
13  
14 546 25 Kragh A, Elmståhl S, Atroshi I. Older adults' medication use 6 months before and  
15  
16  
17 547 after hip fracture: A population-based cohort study. *J Am Geriatr Soc* 2011;59:863-8.  
18  
19  
20 548 doi:10.1111/j.1532-5415.2011.03372.x.  
21  
22  
23 549 26 Lai SW, Liao KF, Liao CC, et al. Polypharmacy correlates with increased risk for hip  
24  
25  
26 550 fracture in the elderly. A population-based study. *Medicine* 2010;89:295-9.  
27  
28  
29 551 doi:10.1097/MD.0b013e3181f15efc.  
30  
31  
32 552 27 Chan AW, Tetzlaff JM, Gøtzsche PC, et al. SPIRIT 2013 explanation and  
33  
34  
35 553 elaboration: guidance for protocols of clinical trials. *BMJ* 2013;346:e7586.  
36  
37  
38 554 doi:10.1136/bmj.e7586.  
39  
40  
41 555 28 Gnjidic D, Hilmer SN, Blyth FM, et al. Polypharmacy cutoff and outcomes: five or  
42  
43  
44 556 more medicines were used to identify community-dwelling older men at risk of  
45  
46  
47 557 different adverse outcomes. *J Clin Epidemiol* 2012;65:989-95.  
48  
49  
50 558 doi:10.1016/j.jclinepi.2012.02.018.  
51  
52  
53  
54  
55  
56  
57  
58  
59  
60

- 1  
2  
3  
4  
5  
6 559 29 Hosomi N, Nagai Y, Kohriyama T, et al. The Japan Statin Treatment Against  
7  
8 560 Recurrent Stroke (J-STARS): a multicenter, randomized, open-label, parallel-group  
9  
10  
11 561 study. *EBioMedicine* 2015;2(9):1071-8. doi:10.1016/j.ebiom.2015.08.006.  
12  
13  
14 562 30 Nakagawa S, Kume N. Pharmacy practice in Japan. *Can J Hosp Pharm*  
15  
16 563 2017;70(3):232-42. doi:10.4212/cjhp.v70i3.1663.  
17  
18  
19 564 31 Wood L, Egger M, Gluud LL, et al. Empirical evidence of bias in treatment effect  
20  
21 565 estimates in controlled trials with different interventions and outcomes:  
22  
23 566 meta-epidemiological study. *BMJ* 2008;336(7644):601-5.  
24  
25 567 doi:10.1136/bmj.39465.451748.AD.  
26  
27  
28 568 32 Lisby M, Thomsen A, Nielsen LP, et al. The effect of systematic review in elderly  
29  
30 569 patients admitted to an acute ward of internal medicine. *Basic Clin Pharmacol*  
31  
32 570 *Toxicol* 2010;106(5):422-7. doi:10.1111/j.1742-7843.2009.00511.x.  
33  
34 571 33 McMullin ST, Hennenfent JA, Ritchie DJ, et al. A prospective, randomized trial to  
35  
36 572 assess the cost impact of pharmacist-initiated interventions. *Arch Intern Med*  
37  
38 573 1999;159(19):2306-9. doi:10.1001/archinte.159.19.2306.  
39  
40 574 34 Spinewine A, Swine C, Dhillon S, et al. Effect of a collaborative approach on the  
41  
42 575 quality of prescribing for geriatric inpatients: a randomized, controlled trial. *J Am*  
43  
44 576 *Geriatr Soc* 2007;55(5):658-65. doi:10.1111/j.1532-5415.2007.01132.x.  
45  
46  
47  
48  
49  
50  
51  
52  
53  
54  
55  
56  
57  
58  
59  
60

- 1  
2  
3  
4  
5  
6 577 35 Lipton HL, Bird JA. The impact of clinical pharmacists' consultations on geriatric  
7  
8  
9 578 patients' compliance and medical care use: a randomized controlled trial.  
10  
11 579 *Gerontologist* 1994;34(3):307-15. doi:10.1093/geront/34.3.307.  
12  
13  
14 580 36 Mekonnen AB, McLachlan AJ, Brien JE. Effectiveness of pharmacist-led  
15  
16  
17 581 medication reconciliation programmes on clinical outcomes at hospital transitions:  
18  
19  
20 582 a systematic review and meta-analysis. *BMJ Open* 2016;6:e010003.  
21  
22  
23 583 doi:10.1136/bmjopen-2015-010003.  
24  
25  
26 584

585 **Table 1.** Time schedule of participant enrolment, interventions, and assessments.

|                            | STUDY PERIOD |                                                                                     |                 |       |       |       |
|----------------------------|--------------|-------------------------------------------------------------------------------------|-----------------|-------|-------|-------|
|                            | Enrolment    | Allocation                                                                          | Post-allocation |       |       |       |
| TIMEPOINT*                 | $-t_1$       | 0                                                                                   | $t_1$           | $t_2$ | $t_3$ | $t_4$ |
| <b>ENROLMENT:</b>          |              |                                                                                     |                 |       |       |       |
| Eligibility screen         | X            |                                                                                     |                 |       |       |       |
| Informed consent           | X            |                                                                                     |                 |       |       |       |
| Allocation                 |              | X                                                                                   |                 |       |       |       |
| <b>INTERVENTIONS:</b>      |              |                                                                                     |                 |       |       |       |
| Pharmacist intervention    |              | 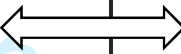   |                 |       |       |       |
| Usual care (control)       |              |  |                 |       |       |       |
| <b>ASSESSMENTS:</b>        |              |                                                                                     |                 |       |       |       |
| Number of medications      | X            |                                                                                     | X               | X     | X     | X     |
| Number of PIP <sup>†</sup> | X            |                                                                                     | X               | X     | X     | X     |
| Number of PPO <sup>†</sup> | X            |                                                                                     | X               | X     | X     | X     |
| Adverse drug events        |              |                                                                                     | X               |       |       |       |
| Discharge destination      |              |                                                                                     | X               |       |       |       |
| Duration of hospital stay  |              |                                                                                     | X               |       |       |       |
| All-cause death            |              |                                                                                     | X               | X     | X     | X     |
| Readmission <sup>‡</sup>   |              |                                                                                     |                 | X     | X     | X     |
| ED visit                   |              |                                                                                     |                 | X     | X     | X     |



|                              |  |  |   |   |   |   |
|------------------------------|--|--|---|---|---|---|
| <b>Myocardial infarction</b> |  |  | X | X | X | X |
| <b>Ischaemic stroke</b>      |  |  | X | X | X | X |
| <b>Fracture</b>              |  |  | X | X | X | X |

586 \* $t_1$ , within 72 hours after admission;  $t_1$ , at discharge;  $t_2$ , six months after randomisation;

587  $t_3$ , 12 months after randomisation;  $t_4$ , 24 months after randomisation.

588 †PIP and PPO are defined based on the 2015 STOPP/START Criteria.

589 ‡Includes all-cause hospitalisation regardless of the cause of hospitalisation.

590 ED, emergency department; PIP, potentially inappropriate prescribing; PPO, potential

591 prescribing omission.

592

593 **Table 2.** Variables, measures, and analysis methods.

| Variable/outcome                                               | Hypothesis           | Measured outcomes                                                           | Methods of analysis |
|----------------------------------------------------------------|----------------------|-----------------------------------------------------------------------------|---------------------|
| Primary                                                        |                      |                                                                             |                     |
| Readmission* at 12 months                                      | Improvement occurred | Readmission rate % [binary]                                                 | Chi-squared test    |
| Secondary                                                      |                      |                                                                             |                     |
| Number of medications at discharge and at 6, 12, and 24 months | Decline occurred     | Total number of medications [continuous]                                    | T-test              |
| PIP <sup>†</sup> at discharge and at 6, 12, and 24 months      | Decline occurred     | Total number of PIP [continuous]                                            | T-test              |
|                                                                | Improvement occurred | Proportion of patients who take any PIP % [binary]                          | Chi-squared test    |
| PPO <sup>†</sup> at discharge and at 6, 12, and 24 months      | Decline occurred     | Total number of PPO [continuous]                                            | T-test              |
|                                                                | Improvement occurred | Proportion of patients who take any PPO % [binary]                          | Chi-squared test    |
| Readmission* at 6 and 24 months                                | Improvement occurred | Readmission rate % [binary]                                                 | Chi-squared test    |
| ED visit at 6, 12, and 24 months                               | Improvement occurred | Proportion of patients who visit ED % [binary]                              | Chi-squared test    |
| All-cause death at 6, 12, and 24 months                        | Improvement occurred | All-cause mortality % [binary]                                              | Chi-squared test    |
| Acute myocardial infarction at 6, 12, and 24 months            | Improvement occurred | Proportion of patients whom acute myocardial infarction occurred % [binary] | Chi-squared test    |
| Acute ischaemic stroke at 6, 12, and 24 months                 | Improvement occurred | Proportion of patients whom acute ischaemic stroke occurred % [binary]      | Chi-squared test    |
| Any fractures at 6, 12, and 24 months                          | Improvement occurred | Proportion of patients whom any fractures occurred % [binary]               | Chi-squared test    |

1  
2  
3  
4  
5 594 \*Includes all-cause hospitalisation regardless of the cause of hospitalisation.  
6

7 595 †PIP and PPO are defined based on the 2015 STOPP/START Criteria.  
8

9 596 ED, emergency department; PIP, potentially inappropriate prescribing; PPO, potential  
10

11 597 prescribing omission.  
12  
13  
14  
15  
16  
17  
18  
19  
20  
21  
22  
23  
24  
25  
26  
27  
28  
29  
30  
31  
32  
33  
34  
35  
36  
37  
38  
39  
40  
41  
42  
43  
44  
45  
46  
47  
48  
49  
50  
51  
52  
53  
54  
55  
56  
57  
58  
59  
60

1  
2  
3  
4  
5  
6  
7  
8  
9  
10  
11  
12  
13  
14  
15  
16  
17  
18  
19  
20  
21  
22  
23  
24  
25  
26  
27  
28  
29  
30  
31  
32  
33  
34  
35  
36  
37  
38  
39  
40  
41  
42  
43  
44  
45  
46  
47  
48  
49  
50  
51  
52  
53  
54  
55  
56  
57  
58  
59  
60

598 **Figure 1.** Flow diagram of the participant.

For peer review only

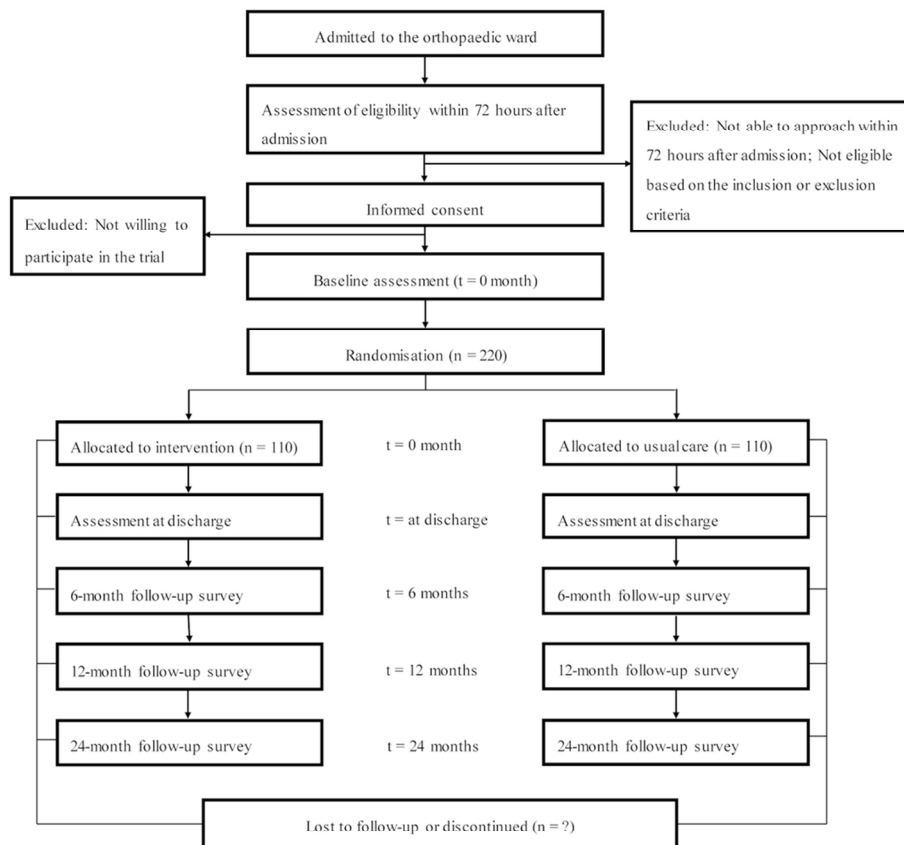

Flow diagram of the participant.

99x99mm (300 x 300 DPI)

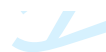

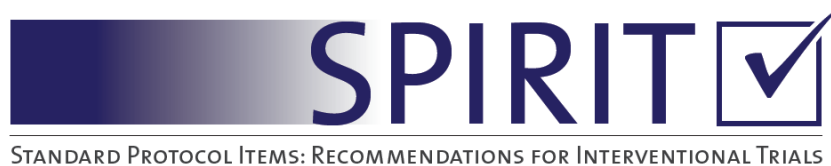

STANDARD PROTOCOL ITEMS: RECOMMENDATIONS FOR INTERVENTIONAL TRIALS

SPIRIT 2013 Checklist: Recommended items to address in a clinical trial protocol and related documents\*

| Section/item                      | Item No | Description                                                                                                                                                                                                                                                                              | Page Number on which item is reported |
|-----------------------------------|---------|------------------------------------------------------------------------------------------------------------------------------------------------------------------------------------------------------------------------------------------------------------------------------------------|---------------------------------------|
| <b>Administrative information</b> |         |                                                                                                                                                                                                                                                                                          |                                       |
| Title                             | 1       | Descriptive title identifying the study design, population, interventions, and, if applicable, trial acronym                                                                                                                                                                             | 1                                     |
| Trial registration                | 2a      | Trial identifier and registry name. If not yet registered, name of intended registry                                                                                                                                                                                                     | 4                                     |
|                                   | 2b      | All items from the World Health Organization Trial Registration Data Set                                                                                                                                                                                                                 | 4                                     |
| Protocol version                  | 3       | Date and version identifier                                                                                                                                                                                                                                                              | NA                                    |
| Funding                           | 4       | Sources and types of financial, material, and other support                                                                                                                                                                                                                              | 29                                    |
| Roles and responsibilities        | 5a      | Names, affiliations, and roles of protocol contributors                                                                                                                                                                                                                                  | 28                                    |
|                                   | 5b      | Name and contact information for the trial sponsor                                                                                                                                                                                                                                       | NA                                    |
|                                   | 5c      | Role of study sponsor and funders, if any, in study design; collection, management, analysis, and interpretation of data; writing of the report; and the decision to submit the report for publication, including whether they will have ultimate authority over any of these activities | NA                                    |
|                                   | 5d      | Composition, roles, and responsibilities of the coordinating centre, steering committee, endpoint adjudication committee, data management team, and other individuals or groups overseeing the trial, if applicable (see Item 21a for data monitoring committee)                         | NA                                    |
| <b>Introduction</b>               |         |                                                                                                                                                                                                                                                                                          |                                       |

|                                                           |     |                                                                                                                                                                                                                                                                                                                                                                                |       |
|-----------------------------------------------------------|-----|--------------------------------------------------------------------------------------------------------------------------------------------------------------------------------------------------------------------------------------------------------------------------------------------------------------------------------------------------------------------------------|-------|
| Background and rationale                                  | 6a  | Description of research question and justification for undertaking the trial, including summary of relevant studies (published and unpublished) examining benefits and harms for each intervention                                                                                                                                                                             | 6-9   |
|                                                           | 6b  | Explanation for choice of comparators                                                                                                                                                                                                                                                                                                                                          | 17    |
| Objectives                                                | 7   | Specific objectives or hypotheses                                                                                                                                                                                                                                                                                                                                              | 8-9   |
| Trial design                                              | 8   | Description of trial design including type of trial (eg, parallel group, crossover, factorial, single group), allocation ratio, and framework (eg, superiority, equivalence, noninferiority, exploratory)                                                                                                                                                                      | 10    |
| <b>Methods: Participants, interventions, and outcomes</b> |     |                                                                                                                                                                                                                                                                                                                                                                                |       |
| Study setting                                             | 9   | Description of study settings (eg, community clinic, academic hospital) and list of countries where data will be collected. Reference to where list of study sites can be obtained                                                                                                                                                                                             | 11    |
| Eligibility criteria                                      | 10  | Inclusion and exclusion criteria for participants. If applicable, eligibility criteria for study centres and individuals who will perform the interventions (eg, surgeons, psychotherapists)                                                                                                                                                                                   | 11-12 |
| Interventions                                             | 11a | Interventions for each group with sufficient detail to allow replication, including how and when they will be administered                                                                                                                                                                                                                                                     | 15-17 |
|                                                           | 11b | Criteria for discontinuing or modifying allocated interventions for a given trial participant (eg, drug dose change in response to harms, participant request, or improving/worsening disease)                                                                                                                                                                                 | 15-17 |
|                                                           | 11c | Strategies to improve adherence to intervention protocols, and any procedures for monitoring adherence (eg, drug tablet return, laboratory tests)                                                                                                                                                                                                                              | NA    |
|                                                           | 11d | Relevant concomitant care and interventions that are permitted or prohibited during the trial                                                                                                                                                                                                                                                                                  | 15-18 |
| Outcomes                                                  | 12  | Primary, secondary, and other outcomes, including the specific measurement variable (eg, systolic blood pressure), analysis metric (eg, change from baseline, final value, time to event), method of aggregation (eg, median, proportion), and time point for each outcome. Explanation of the clinical relevance of chosen efficacy and harm outcomes is strongly recommended | 19-20 |

|                                                                     |     |                                                                                                                                                                                                                                                                                                                                                          |                          |
|---------------------------------------------------------------------|-----|----------------------------------------------------------------------------------------------------------------------------------------------------------------------------------------------------------------------------------------------------------------------------------------------------------------------------------------------------------|--------------------------|
| Participant timeline                                                | 13  | Time schedule of enrolment, interventions (including any run-ins and washouts), assessments, and visits for participants. A schematic diagram is highly recommended (see Figure)                                                                                                                                                                         | 18-19, Figure 1, Table 1 |
| Sample size                                                         | 14  | Estimated number of participants needed to achieve study objectives and how it was determined, including clinical and statistical assumptions supporting any sample size calculations                                                                                                                                                                    | 12, 21                   |
| Recruitment                                                         | 15  | Strategies for achieving adequate participant enrolment to reach target sample size                                                                                                                                                                                                                                                                      | 12-13                    |
| <b>Methods: Assignment of interventions (for controlled trials)</b> |     |                                                                                                                                                                                                                                                                                                                                                          |                          |
| Allocation:                                                         |     |                                                                                                                                                                                                                                                                                                                                                          |                          |
| Sequence generation                                                 | 16a | Method of generating the allocation sequence (eg, computer-generated random numbers), and list of any factors for stratification. To reduce predictability of a random sequence, details of any planned restriction (eg, blocking) should be provided in a separate document that is unavailable to those who enrol participants or assign interventions | 14                       |
| Allocation concealment mechanism                                    | 16b | Mechanism of implementing the allocation sequence (eg, central telephone; sequentially numbered, opaque, sealed envelopes), describing any steps to conceal the sequence until interventions are assigned                                                                                                                                                | 14                       |
| Implementation                                                      | 16c | Who will generate the allocation sequence, who will enrol participants, and who will assign participants to interventions                                                                                                                                                                                                                                | 14                       |
| Blinding (masking)                                                  | 17a | Who will be blinded after assignment to interventions (eg, trial participants, care providers, outcome assessors, data analysts), and how                                                                                                                                                                                                                | 14-15                    |
|                                                                     | 17b | If blinded, circumstances under which unblinding is permissible, and procedure for revealing a participant's allocated intervention during the trial                                                                                                                                                                                                     | NA                       |
| <b>Methods: Data collection, management, and analysis</b>           |     |                                                                                                                                                                                                                                                                                                                                                          |                          |



|                                                          |                            |     |                                                                                                                                                                                                                                                                                                                                                                                                              |                |
|----------------------------------------------------------|----------------------------|-----|--------------------------------------------------------------------------------------------------------------------------------------------------------------------------------------------------------------------------------------------------------------------------------------------------------------------------------------------------------------------------------------------------------------|----------------|
| 1<br>2<br>3<br>4<br>5<br>6<br>7<br>8<br>9<br>10<br>11    | Data collection methods    | 18a | Plans for assessment and collection of outcome, baseline, and other trial data, including any related processes to promote data quality (eg, duplicate measurements, training of assessors) and a description of study instruments (eg, questionnaires, laboratory tests) along with their reliability and validity, if known. Reference to where data collection forms can be found, if not in the protocol | 18-19          |
| 12<br>13<br>14<br>15<br>16<br>17                         |                            | 18b | Plans to promote participant retention and complete follow-up, including list of any outcome data to be collected for participants who discontinue or deviate from intervention protocols                                                                                                                                                                                                                    | 19             |
| 18<br>19<br>20<br>21<br>22<br>23<br>24<br>25             | Data management            | 19  | Plans for data entry, coding, security, and storage, including any related processes to promote data quality (eg, double data entry; range checks for data values). Reference to where details of data management procedures can be found, if not in the protocol                                                                                                                                            | 22-23          |
| 26<br>27<br>28<br>29<br>30<br>31                         | Statistical methods        | 20a | Statistical methods for analysing primary and secondary outcomes. Reference to where other details of the statistical analysis plan can be found, if not in the protocol                                                                                                                                                                                                                                     | 21-22, Table 2 |
| 32<br>33<br>34                                           |                            | 20b | Methods for any additional analyses (eg, subgroup and adjusted analyses)                                                                                                                                                                                                                                                                                                                                     | 21-22, Table 2 |
| 35<br>36<br>37<br>38<br>39<br>40                         |                            | 20c | Definition of analysis population relating to protocol non-adherence (eg, as randomised analysis), and any statistical methods to handle missing data (eg, multiple imputation)                                                                                                                                                                                                                              | 22             |
| 41<br>42                                                 | <b>Methods: Monitoring</b> |     |                                                                                                                                                                                                                                                                                                                                                                                                              |                |
| 43<br>44<br>45<br>46<br>47<br>48<br>49<br>50<br>51<br>52 | Data monitoring            | 21a | Composition of data monitoring committee (DMC); summary of its role and reporting structure; statement of whether it is independent from the sponsor and competing interests; and reference to where further details about its charter can be found, if not in the protocol. Alternatively, an explanation of why a DMC is not needed                                                                        | 23             |
| 53<br>54<br>55<br>56<br>57<br>58<br>59<br>60             |                            | 21b | Description of any interim analyses and stopping guidelines, including who will have access to these interim results and make the final decision to terminate the trial                                                                                                                                                                                                                                      | NA             |

|                                 |     |                                                                                                                                                                                                                                                                                     |       |
|---------------------------------|-----|-------------------------------------------------------------------------------------------------------------------------------------------------------------------------------------------------------------------------------------------------------------------------------------|-------|
| Harms                           | 22  | Plans for collecting, assessing, reporting, and managing solicited and spontaneously reported adverse events and other unintended effects of trial interventions or trial conduct                                                                                                   | 23-24 |
| Auditing                        | 23  | Frequency and procedures for auditing trial conduct, if any, and whether the process will be independent from investigators and the sponsor                                                                                                                                         | 24    |
| <b>Ethics and dissemination</b> |     |                                                                                                                                                                                                                                                                                     |       |
| Research ethics approval        | 24  | Plans for seeking research ethics committee/institutional review board (REC/IRB) approval                                                                                                                                                                                           | 25    |
| Protocol amendments             | 25  | Plans for communicating important protocol modifications (eg, changes to eligibility criteria, outcomes, analyses) to relevant parties (eg, investigators, REC/IRBs, trial participants, trial registries, journals, regulators)                                                    | 25    |
| Consent or assent               | 26a | Who will obtain informed consent or assent from potential trial participants or authorised surrogates, and how (see Item 32)                                                                                                                                                        | 25    |
|                                 | 26b | Additional consent provisions for collection and use of participant data and biological specimens in ancillary studies, if applicable                                                                                                                                               | NA    |
| Confidentiality                 | 27  | How personal information about potential and enrolled participants will be collected, shared, and maintained in order to protect confidentiality before, during, and after the trial                                                                                                | 25    |
| Declaration of interests        | 28  | Financial and other competing interests for principal investigators for the overall trial and each study site                                                                                                                                                                       | 29    |
| Access to data                  | 29  | Statement of who will have access to the final trial dataset, and disclosure of contractual agreements that limit such access for investigators                                                                                                                                     | 22    |
| Ancillary and post-trial care   | 30  | Provisions, if any, for ancillary and post-trial care, and for compensation to those who suffer harm from trial participation                                                                                                                                                       | NA    |
| Dissemination policy            | 31a | Plans for investigators and sponsor to communicate trial results to participants, healthcare professionals, the public, and other relevant groups (eg, via publication, reporting in results databases, or other data sharing arrangements), including any publication restrictions | 25    |

|                            |     |                                                                                                                                                                                                |                    |
|----------------------------|-----|------------------------------------------------------------------------------------------------------------------------------------------------------------------------------------------------|--------------------|
|                            | 31b | Authorship eligibility guidelines and any intended use of professional writers                                                                                                                 | NA                 |
|                            | 31c | Plans, if any, for granting public access to the full protocol, participant-level dataset, and statistical code                                                                                | NA                 |
| <b>Appendices</b>          |     |                                                                                                                                                                                                |                    |
| Informed consent materials | 32  | Model consent form and other related documentation given to participants and authorised surrogates                                                                                             | Supplementary file |
| Biological specimens       | 33  | Plans for collection, laboratory evaluation, and storage of biological specimens for genetic or molecular analysis in the current trial and for future use in ancillary studies, if applicable | NA                 |

\*It is strongly recommended that this checklist be read in conjunction with the SPIRIT 2013 Explanation & Elaboration for important clarification on the items. Amendments to the protocol should be tracked and dated. The SPIRIT checklist is copyrighted by the SPIRIT Group under the Creative Commons "[Attribution-NonCommercial-NoDerivs 3.0 Unported](https://creativecommons.org/licenses/by-nc-nd/3.0/)" license.

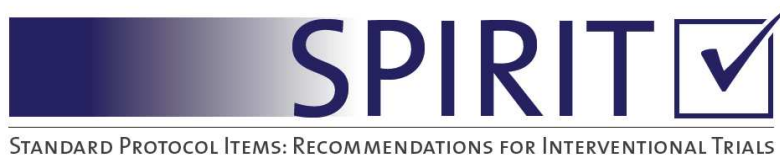

SPIRIT 2013 Checklist: Recommended items to address in a clinical trial protocol and related documents\*

| Section/item                      | Item No | Description                                                                                                                                                                                                                                                                              | Page Number on which item is reported |
|-----------------------------------|---------|------------------------------------------------------------------------------------------------------------------------------------------------------------------------------------------------------------------------------------------------------------------------------------------|---------------------------------------|
| <b>Administrative information</b> |         |                                                                                                                                                                                                                                                                                          |                                       |
| Title                             | 1       | Descriptive title identifying the study design, population, interventions, and, if applicable, trial acronym                                                                                                                                                                             | 1                                     |
| Trial registration                | 2a      | Trial identifier and registry name. If not yet registered, name of intended registry                                                                                                                                                                                                     | 4                                     |
|                                   | 2b      | All items from the World Health Organization Trial Registration Data Set                                                                                                                                                                                                                 | 4                                     |
| Protocol version                  | 3       | Date and version identifier                                                                                                                                                                                                                                                              | NA                                    |
| Funding                           | 4       | Sources and types of financial, material, and other support                                                                                                                                                                                                                              | 29                                    |
| Roles and responsibilities        | 5a      | Names, affiliations, and roles of protocol contributors                                                                                                                                                                                                                                  | 28                                    |
|                                   | 5b      | Name and contact information for the trial sponsor                                                                                                                                                                                                                                       | NA                                    |
|                                   | 5c      | Role of study sponsor and funders, if any, in study design; collection, management, analysis, and interpretation of data; writing of the report; and the decision to submit the report for publication, including whether they will have ultimate authority over any of these activities | NA                                    |
|                                   | 5d      | Composition, roles, and responsibilities of the coordinating centre, steering committee, endpoint adjudication committee, data management team, and other individuals or groups overseeing the trial, if applicable (see Item 21a for data monitoring committee)                         | NA                                    |
| <b>Introduction</b>               |         |                                                                                                                                                                                                                                                                                          |                                       |

|                                                           |     |                                                                                                                                                                                                                                                                                                                                                                                |       |
|-----------------------------------------------------------|-----|--------------------------------------------------------------------------------------------------------------------------------------------------------------------------------------------------------------------------------------------------------------------------------------------------------------------------------------------------------------------------------|-------|
| Background and rationale                                  | 6a  | Description of research question and justification for undertaking the trial, including summary of relevant studies (published and unpublished) examining benefits and harms for each intervention                                                                                                                                                                             | 6-9   |
|                                                           | 6b  | Explanation for choice of comparators                                                                                                                                                                                                                                                                                                                                          | 17    |
| Objectives                                                | 7   | Specific objectives or hypotheses                                                                                                                                                                                                                                                                                                                                              | 8-9   |
| Trial design                                              | 8   | Description of trial design including type of trial (eg, parallel group, crossover, factorial, single group), allocation ratio, and framework (eg, superiority, equivalence, noninferiority, exploratory)                                                                                                                                                                      | 10    |
| <b>Methods: Participants, interventions, and outcomes</b> |     |                                                                                                                                                                                                                                                                                                                                                                                |       |
| Study setting                                             | 9   | Description of study settings (eg, community clinic, academic hospital) and list of countries where data will be collected. Reference to where list of study sites can be obtained                                                                                                                                                                                             | 11    |
| Eligibility criteria                                      | 10  | Inclusion and exclusion criteria for participants. If applicable, eligibility criteria for study centres and individuals who will perform the interventions (eg, surgeons, psychotherapists)                                                                                                                                                                                   | 11-12 |
| Interventions                                             | 11a | Interventions for each group with sufficient detail to allow replication, including how and when they will be administered                                                                                                                                                                                                                                                     | 15-17 |
|                                                           | 11b | Criteria for discontinuing or modifying allocated interventions for a given trial participant (eg, drug dose change in response to harms, participant request, or improving/worsening disease)                                                                                                                                                                                 | 15-17 |
|                                                           | 11c | Strategies to improve adherence to intervention protocols, and any procedures for monitoring adherence (eg, drug tablet return, laboratory tests)                                                                                                                                                                                                                              | NA    |
|                                                           | 11d | Relevant concomitant care and interventions that are permitted or prohibited during the trial                                                                                                                                                                                                                                                                                  | 15-18 |
| Outcomes                                                  | 12  | Primary, secondary, and other outcomes, including the specific measurement variable (eg, systolic blood pressure), analysis metric (eg, change from baseline, final value, time to event), method of aggregation (eg, median, proportion), and time point for each outcome. Explanation of the clinical relevance of chosen efficacy and harm outcomes is strongly recommended | 19-20 |

|                                                                     |     |                                                                                                                                                                                                                                                                                                                                                          |                          |
|---------------------------------------------------------------------|-----|----------------------------------------------------------------------------------------------------------------------------------------------------------------------------------------------------------------------------------------------------------------------------------------------------------------------------------------------------------|--------------------------|
| Participant timeline                                                | 13  | Time schedule of enrolment, interventions (including any run-ins and washouts), assessments, and visits for participants. A schematic diagram is highly recommended (see Figure)                                                                                                                                                                         | 18-19, Figure 1, Table 1 |
| Sample size                                                         | 14  | Estimated number of participants needed to achieve study objectives and how it was determined, including clinical and statistical assumptions supporting any sample size calculations                                                                                                                                                                    | 12, 21                   |
| Recruitment                                                         | 15  | Strategies for achieving adequate participant enrolment to reach target sample size                                                                                                                                                                                                                                                                      | 12-13                    |
| <b>Methods: Assignment of interventions (for controlled trials)</b> |     |                                                                                                                                                                                                                                                                                                                                                          |                          |
| Allocation:                                                         |     |                                                                                                                                                                                                                                                                                                                                                          |                          |
| Sequence generation                                                 | 16a | Method of generating the allocation sequence (eg, computer-generated random numbers), and list of any factors for stratification. To reduce predictability of a random sequence, details of any planned restriction (eg, blocking) should be provided in a separate document that is unavailable to those who enrol participants or assign interventions | 14                       |
| Allocation concealment mechanism                                    | 16b | Mechanism of implementing the allocation sequence (eg, central telephone; sequentially numbered, opaque, sealed envelopes), describing any steps to conceal the sequence until interventions are assigned                                                                                                                                                | 14                       |
| Implementation                                                      | 16c | Who will generate the allocation sequence, who will enrol participants, and who will assign participants to interventions                                                                                                                                                                                                                                | 14                       |
| Blinding (masking)                                                  | 17a | Who will be blinded after assignment to interventions (eg, trial participants, care providers, outcome assessors, data analysts), and how                                                                                                                                                                                                                | 14-15                    |
|                                                                     | 17b | If blinded, circumstances under which unblinding is permissible, and procedure for revealing a participant's allocated intervention during the trial                                                                                                                                                                                                     | NA                       |
| <b>Methods: Data collection, management, and analysis</b>           |     |                                                                                                                                                                                                                                                                                                                                                          |                          |

|                                                                      |                            |     |                                                                                                                                                                                                                                                                                                                                                                                                              |                |
|----------------------------------------------------------------------|----------------------------|-----|--------------------------------------------------------------------------------------------------------------------------------------------------------------------------------------------------------------------------------------------------------------------------------------------------------------------------------------------------------------------------------------------------------------|----------------|
| 1<br>2<br>3<br>4<br>5<br>6<br>7<br>8<br>9<br>10                      | Data collection methods    | 18a | Plans for assessment and collection of outcome, baseline, and other trial data, including any related processes to promote data quality (eg, duplicate measurements, training of assessors) and a description of study instruments (eg, questionnaires, laboratory tests) along with their reliability and validity, if known. Reference to where data collection forms can be found, if not in the protocol | 18-19          |
| 11<br>12<br>13<br>14<br>15<br>16                                     |                            | 18b | Plans to promote participant retention and complete follow-up, including list of any outcome data to be collected for participants who discontinue or deviate from intervention protocols                                                                                                                                                                                                                    | 19             |
| 17<br>18<br>19<br>20<br>21<br>22<br>23<br>24                         | Data management            | 19  | Plans for data entry, coding, security, and storage, including any related processes to promote data quality (eg, double data entry; range checks for data values). Reference to where details of data management procedures can be found, if not in the protocol                                                                                                                                            | 22-23          |
| 25<br>26<br>27<br>28<br>29                                           | Statistical methods        | 20a | Statistical methods for analysing primary and secondary outcomes. Reference to where other details of the statistical analysis plan can be found, if not in the protocol                                                                                                                                                                                                                                     | 21-22, Table 2 |
| 30<br>31<br>32                                                       |                            | 20b | Methods for any additional analyses (eg, subgroup and adjusted analyses)                                                                                                                                                                                                                                                                                                                                     | 21-22, Table 2 |
| 33<br>34<br>35<br>36<br>37<br>38                                     |                            | 20c | Definition of analysis population relating to protocol non-adherence (eg, as randomised analysis), and any statistical methods to handle missing data (eg, multiple imputation)                                                                                                                                                                                                                              | 22             |
| 39                                                                   | <b>Methods: Monitoring</b> |     |                                                                                                                                                                                                                                                                                                                                                                                                              |                |
| 40<br>41<br>42<br>43<br>44<br>45<br>46<br>47<br>48                   | Data monitoring            | 21a | Composition of data monitoring committee (DMC); summary of its role and reporting structure; statement of whether it is independent from the sponsor and competing interests; and reference to where further details about its charter can be found, if not in the protocol. Alternatively, an explanation of why a DMC is not needed                                                                        | 23             |
| 49<br>50<br>51<br>52<br>53<br>54<br>55<br>56<br>57<br>58<br>59<br>60 |                            | 21b | Description of any interim analyses and stopping guidelines, including who will have access to these interim results and make the final decision to terminate the trial                                                                                                                                                                                                                                      | NA             |

|                                 |     |                                                                                                                                                                                                                                                                                     |       |
|---------------------------------|-----|-------------------------------------------------------------------------------------------------------------------------------------------------------------------------------------------------------------------------------------------------------------------------------------|-------|
| Harms                           | 22  | Plans for collecting, assessing, reporting, and managing solicited and spontaneously reported adverse events and other unintended effects of trial interventions or trial conduct                                                                                                   | 23-24 |
| Auditing                        | 23  | Frequency and procedures for auditing trial conduct, if any, and whether the process will be independent from investigators and the sponsor                                                                                                                                         | 24    |
| <b>Ethics and dissemination</b> |     |                                                                                                                                                                                                                                                                                     |       |
| Research ethics approval        | 24  | Plans for seeking research ethics committee/institutional review board (REC/IRB) approval                                                                                                                                                                                           | 25    |
| Protocol amendments             | 25  | Plans for communicating important protocol modifications (eg, changes to eligibility criteria, outcomes, analyses) to relevant parties (eg, investigators, REC/IRBs, trial participants, trial registries, journals, regulators)                                                    | 25    |
| Consent or assent               | 26a | Who will obtain informed consent or assent from potential trial participants or authorised surrogates, and how (see Item 32)                                                                                                                                                        | 25    |
|                                 | 26b | Additional consent provisions for collection and use of participant data and biological specimens in ancillary studies, if applicable                                                                                                                                               | NA    |
| Confidentiality                 | 27  | How personal information about potential and enrolled participants will be collected, shared, and maintained in order to protect confidentiality before, during, and after the trial                                                                                                | 25    |
| Declaration of interests        | 28  | Financial and other competing interests for principal investigators for the overall trial and each study site                                                                                                                                                                       | 29    |
| Access to data                  | 29  | Statement of who will have access to the final trial dataset, and disclosure of contractual agreements that limit such access for investigators                                                                                                                                     | 22    |
| Ancillary and post-trial care   | 30  | Provisions, if any, for ancillary and post-trial care, and for compensation to those who suffer harm from trial participation                                                                                                                                                       | NA    |
| Dissemination policy            | 31a | Plans for investigators and sponsor to communicate trial results to participants, healthcare professionals, the public, and other relevant groups (eg, via publication, reporting in results databases, or other data sharing arrangements), including any publication restrictions | 25    |



|                            |     |                                                                                                                                                                                                |                    |
|----------------------------|-----|------------------------------------------------------------------------------------------------------------------------------------------------------------------------------------------------|--------------------|
|                            | 31b | Authorship eligibility guidelines and any intended use of professional writers                                                                                                                 | NA                 |
|                            | 31c | Plans, if any, for granting public access to the full protocol, participant-level dataset, and statistical code                                                                                | NA                 |
| <b>Appendices</b>          |     |                                                                                                                                                                                                |                    |
| Informed consent materials | 32  | Model consent form and other related documentation given to participants and authorised surrogates                                                                                             | Supplementary file |
| Biological specimens       | 33  | Plans for collection, laboratory evaluation, and storage of biological specimens for genetic or molecular analysis in the current trial and for future use in ancillary studies, if applicable | NA                 |

\*It is strongly recommended that this checklist be read in conjunction with the SPIRIT 2013 Explanation & Elaboration for important clarification on the items. Amendments to the protocol should be tracked and dated. The SPIRIT checklist is copyrighted by the SPIRIT Group under the Creative Commons "[Attribution-NonCommercial-NoDerivs 3.0 Unported](https://creativecommons.org/licenses/by-nc-nd/3.0/)" license.
